# Supplementary material for: Structure and bonding patterns in heterometallic organometallics with linear Ln–Pd–Ln motifs
Source: Royal Society of Chemistry journal article supplement (doi:10.1039/d2sc06933d), 2023-01-01
Supplement: d2sc06933d1.pdf [file d2sc06933d1.pdf]

## Supporting Information for the manuscript:

### Structure and Bonding Patterns in Heterometallic Organometallics with linear Ln-Pd-Ln motifs

Valeriu Cemortan,<sup>a,b</sup> Thomas Simler,<sup>a</sup> Jules Moutet,<sup>a</sup> Arnaud Jaoul,<sup>a</sup> Carine Clavaguéra<sup>b\*</sup> and  
Grégory Nocton<sup>a\*</sup>

- a. LCM, CNRS, Ecole polytechnique, Institut Polytechnique de Paris, Route de Saclay, 91120 Palaiseau, France
- b. Université Paris-Saclay, CNRS, Institut de Chimie Physique, UMR8000, 91405 Orsay, France.

## Table of contents

|      |                                                                                    |      |
|------|------------------------------------------------------------------------------------|------|
| I.   | Syntheses.....                                                                     | S4   |
| II.  | <sup>1</sup> H NMR .....                                                           | S7   |
| 1.   | Complex <b>1</b> .....                                                             | S7   |
| 2.   | Compounds <b>2</b> and <b>3</b> .....                                              | S8   |
| a)   | NMR of compounds .....                                                             | S8   |
| b)   | <i>In situ</i> studies of addition of Cp* <sub>2</sub> Yb(OEt <sub>2</sub> ) ..... | S11  |
| 3.   | Complex <b>4</b> .....                                                             | S16  |
| a)   | NMR of compounds .....                                                             | S16  |
| b)   | Variable temperature NMR of complex <b>4</b> .....                                 | S18  |
| c)   | Formation reactions of compound <b>4</b> .....                                     | S20  |
| 4.   | Complex <b>5</b> .....                                                             | S22  |
| a)   | NMR of compounds .....                                                             | S22  |
| b)   | Variable temperature NMR of complex <b>5</b> .....                                 | S23  |
| c)   | <i>In situ</i> formation reactions of <b>5</b> .....                               | S25  |
| 5.   | Compound <b>6</b> .....                                                            | S29  |
| III. | Magnetism.....                                                                     | S30  |
| IV.  | Crystallographic data.....                                                         | S31  |
| V.   | Theoretical calculations.....                                                      | S66  |
| 1.   | Geometry optimisations and electronic structure .....                              | S67  |
| a)   | Compound <b>1</b> .....                                                            | S67  |
| b)   | Compound <b>4</b> .....                                                            | S69  |
| 1)   | DFT calculations.....                                                              | S69  |
| 2)   | CASSCF calculations .....                                                          | S75  |
| c)   | Compound <b>5</b> .....                                                            | S77  |
| 1)   | DFT calculations.....                                                              | S77  |
| 2)   | CASSCF calculations .....                                                          | S83  |
| d)   | Compound <b>6</b> .....                                                            | S87  |
| 2.   | Topological analyses.....                                                          | S93  |
| a)   | <b>Density Overlap Regions Indicator (DORI) results</b> .....                      | S93  |
| b)   | <b>QTAIM</b> analysis .....                                                        | S95  |
| c)   | <b>ELF</b> analysis .....                                                          | S96  |
| 3.   | C-H activation – calculating the transition state .....                            | S100 |
| 1.   | Computations on the compound <b>1</b> .....                                        | S100 |
| a)   | Transition state calculations.....                                                 | S100 |
| b)   | Second possible transition state.....                                              | S101 |

|                 |                                                                                  |      |
|-----------------|----------------------------------------------------------------------------------|------|
| c)              | Computing the departure of the methyl .....                                      | S102 |
| d)              | Comparison between the two possible transition states.....                       | S102 |
| 2.              | Computations with addition of lanthanides .....                                  | S104 |
| a)              | Modelling an interaction between Cp* <sub>2</sub> Ln and compound <b>1</b> ..... | S104 |
| 3.              | Computations with the explicit addition of another lanthanide .....              | S109 |
| a)              | Modelling the addition of a further lanthanide .....                             | S109 |
| b)              | Species on the full C-H activation energy profile .....                          | S113 |
| References..... |                                                                                  | S117 |

## I. Syntheses

All reactions were performed using standard Schlenk-line techniques or in nitrogen-filled gloveboxes (MBraun, Garching, Germany). All glassware was dried at 140 °C for at least 12 h prior to use. Tetrahydrofuran (THF), THF- $d_8$ , toluene, and toluene- $d_8$  were dried over sodium, degassed, and transferred under reduced pressure in a cold flask. Acetonitrile (MeCN), MeCN- $d_3$ , pyridine (pyr), pyr- $d_5$  were dried over  $CaH_2$ , distilled and degassed prior to use.  $^1H$  NMR spectra were recorded in 5-mm tubes adapted with a J. Young valve on Bruker AVANCE II or III-300 MHz (Bruker, Billerica, MA, USA) spectrometers.  $^1H$  chemical shifts were expressed relative to TMS (tetramethylsilane) in ppm. Temperature dependent magnetic susceptibility measurements were made with a SQUID in sealed quartz tube on a SQUID at 0.5 and 2 T. Diamagnetic corrections were made using Pascal's constants. Elemental analyses were obtained from Mikroanalytisches Labor Pascher (Remagen, Germany). 2-(benzimidazol-2-yl)pyrimidine (Hbimp),<sup>1</sup> (tmeda)Pd(Me)<sub>2</sub>,<sup>2</sup> Cp\*<sub>2</sub>Sm(OEt)<sub>2</sub><sup>3</sup> and Cp\*<sub>2</sub>Yb(OEt)<sub>2</sub><sup>4</sup> were synthesized according to described procedures.

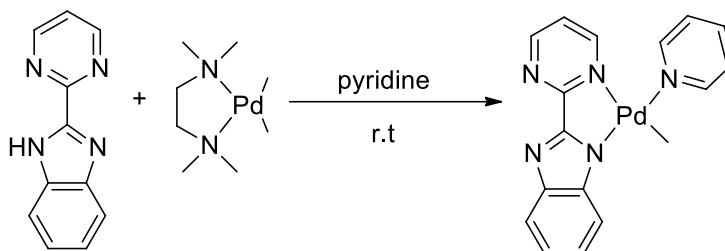

**(bimpm)Pd(pyr)(Me) (1).** Hbimp (390 mg, 2.0 mmol, 1 eq) and (tmeda)Pd(Me)<sub>2</sub> (520 mg, 2.05 mmol, 1.03 eq) were dissolved in pyridine. The initially colourless suspension gradually turned to a golden solution within 30 minutes. An intense gaseous evolution was concurrently observed. The mixture was stirred for an hour. Adding pentane to the solution precipitated the product as a beige solid. The solid was recovered by filtering the mixture. Further washing with pentane and diethyl ether yielded analytically pure (bimpm)Pd(py)(Me), **1** (700 mg, 1.77 mmol, 88% yield). Crystals suitable for XRD studies were obtained by dissolving the compound in pyridine (golden solution), filtering it through a MF-Millipore membrane filter and performing a low vapour diffusion of pentane in the pyridine solution at room temperature.  $^1H$  NMR (300 MHz, THF- $d_8$ , 60 °C):  $\delta$  (ppm): 8.51 (2H, pyridine), 8.30 (1H, pyrimidine), 8.07 (2H, pyrimidine), 7.62 (1H, py), 7.20 (2H, py), 7.15 (4H, benzimidazole), 1.10 (3H, CH<sub>3</sub>). Anal. calculated for C<sub>17</sub>H<sub>15</sub>N<sub>5</sub>Pd: C, 51.59; H, 3.82; N, 17.70; Pd, 26.89. Found: C, 45.87, H, 3.89, N, 11.4.

**(bimpm)Pd(py- $d_5$ )(Me) (1-py- $d_5$ ).** Acetonitrile was poured over Hbimp (80 mg, 0.4 mmol, 1 eq) and (tmeda)Pd(Me)<sub>2</sub> (110 mg, 0.43 mmol, 1.06 eq) under stirring, yielding a beige suspension. A few drops of pyr- $d_5$  were then added to the mixture. Within 30 minutes, the suspension acquired a rich golden hue. The mixture was stirred for 4 h. A gaseous evolution was concurrently observed. At the end of the reaction, all the volatiles were evaporated, after which a yellow powder was obtained. Further washing with pentane and diethyl ether yielded (bimpm)Pd(py- $d_5$ )(Me) (150 mg, 0.36 mmol, 91% yield).

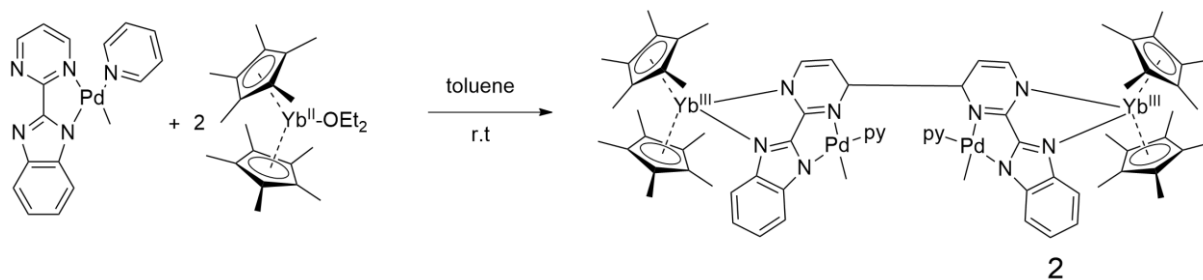

**[Cp\*<sub>2</sub>Yb(bimpm)Pd(py)(Me)]<sub>2</sub> (2).** Toluene was added to a mixture of (bimpm)Pd(Py)(Me) (**1**) (54 mg, 0.14 mmol, 1.4 eq) and Cp\*<sub>2</sub>Yb(OEt<sub>2</sub>) (52 mg, 0.10 mmol, 1.0 eq). The resulting black suspension was stirred for approximately 30 s before the supernatant was filtered. The black solution was evaporated under vacuum without stirring. The black-brown powder was washed thrice with cold pentane. Evaporating the volatiles yielded [Cp\*<sub>2</sub>Yb(bimpm)Pd(py)(Me)]<sub>2</sub> (**2**) as a brown powder (91 mg, 0.054 mmol, 95% yield). Crystals suitable for XRD analysis were grown by dissolving the powder in toluene. Adequate plates were formed after a few days by storing the solution at -40 °C. The product is thermally sensitive above 70 °C. <sup>1</sup>H NMR (300 MHz, Tol-d<sub>8</sub>): δ (ppm): 210.62 (s, 2H), 188.21 (s, 2H), 50.12 (s, 2H), 30.29 (s, 2H), 26.43 (s, 2H), 16.95 (s, 2H), 5.31 (s, Cp\*, 30H), 3.21 (s, Cp\*, 30H), -3.08 (s, 2H), -4.46 (s, Me, 6H), -9.29 (s, 2H), -24.80 (s, 2H). Anal. calculated for C<sub>74</sub>H<sub>90</sub>N<sub>10</sub>Pd<sub>2</sub>Yb<sub>2</sub>: C, 52.89; H, 5.52; N, 8.33. Found: C, 53.04, H, 5.48, N, 8.45.

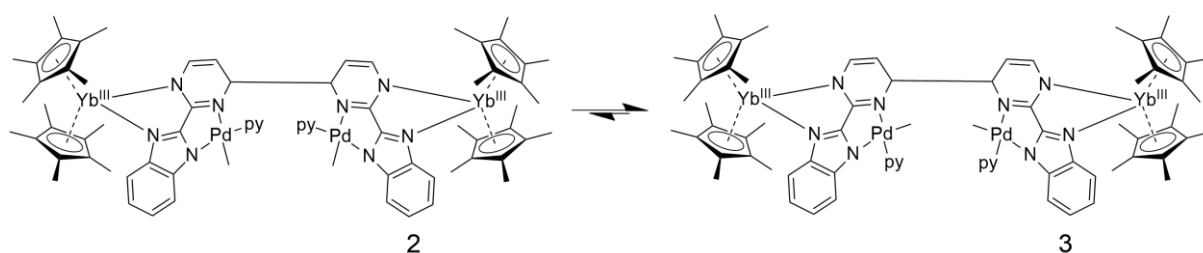

**[Cp\*<sub>2</sub>Yb(bimpm)Pd(Me)(py)]<sub>2</sub> (3)** : Toluene was added to 30 mg of **2**. The dark red-brown solution was stirred at room temperature for 3 days, during which the solution acquired a darker hue. The solution was evaporated under reduced pressure, quantitatively yielding **3** as an analytically pure brown powder. Crystals suitable for XRD analysis were grown by dissolving the powder in toluene. Thin red-brown needles were formed after a few days by storing the solution at -40 °C. <sup>1</sup>H NMR (300 MHz, Tol-d<sub>8</sub>): δ (ppm): 229.08 (s, 2H), 189.21 (s, 2H), 49.59 (s, 2H), 39.99 (s, 2H), 25.16 (s, 2H), 13.44 (s, 2H), 5.48 (s, Cp\*, 30H), 2.49 (s, Cp\*, 30H), -0.08 (s, 4H, py), -14.45 (s, 2H), -33.38 (s, Me, 6H). Anal. calculated for C<sub>74</sub>H<sub>90</sub>N<sub>10</sub>Pd<sub>2</sub>Yb<sub>2</sub>: C, 52.89; H, 5.52; N, 8.33. Found: C, 51.98, H, 5.26, N, 7.95. The product is thermally sensitive above 70 °C.

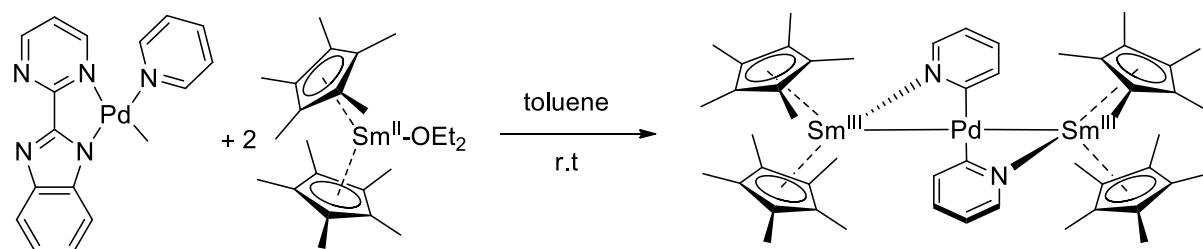

**(Cp\*<sub>2</sub>Sm)<sub>2</sub>[μ-Pd(pyridyl)]<sub>2</sub> (4).** Toluene was added to a mixture of (bimpm)Pd(Py)(Me) (**1**) (100 mg, 0.25 mmol, 1.0 eq) and Cp\*<sub>2</sub>Sm(OEt<sub>2</sub>) (250 mg, 0.52 mmol, 2.1 eq). A black solution with yellow hues was formed instantly. A gaseous evolution was also concurrently observed. The solution was stirred for 30 minutes at room temperature before being filtered. The solution was concentrated under

reduced pressure and left overnight in the freezer at  $-40\text{ }^{\circ}\text{C}$  to obtain brown blocks, suitable for XRD studies. The crystals were dried, washed 5 times with cold pentane, dried again to yield **4** (28.4 mg, 10% yield). The washing solutions were evaporated and the solid was re-dissolved in toluene. Upon concentration and crystallisation, further clean crystals were obtained at  $-40\text{ }^{\circ}\text{C}$ .  $^1\text{H NMR}$  (300 MHz, THF- $d_8$ ):  $\delta$  (ppm): 4.87 (s, 2H, pyridyl), 4.64 (s, 2H, pyridyl), 1.11 (s, Cp\*, 60H), -0.81 (s, pyridyl, 2H), -9.06 (s, pyridyl, 2H). Anal. Calculated for  $\text{C}_{50}\text{H}_{68}\text{N}_2\text{PdSm}_2$ : C, 54.39; H, 6.21; N, 2.54; Pd, 9.64; Sm, 27.23. Found: C, 54.83; H, 6.45; N, 3.33.

**(Cp\* $_2$ Sm) $_2$ [ $\mu$ -Pd(pyridyl- $d_4$ ) $_2$ ] (4-py- $d_4$ )**. The procedure used was identical to that used for the synthesis of **4**, using **1-py- $d_5$**  instead of **1**.

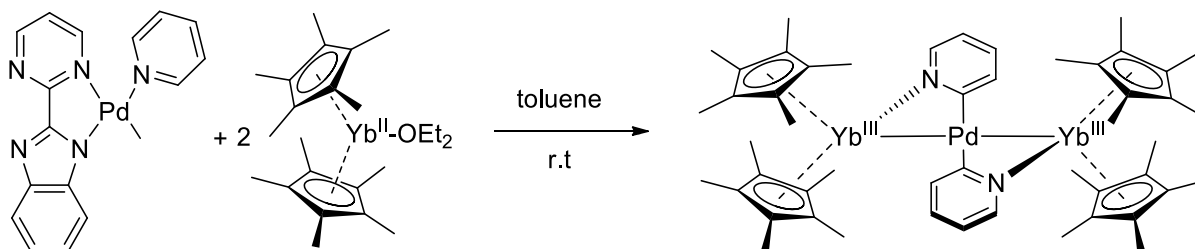

**(Cp\* $_2$ Yb) $_2$ [ $\mu$ -Pd(pyridyl) $_2$ ] (5)**. Toluene was added to a mixture of (bimpm)Pd(Py)(Me) (**1**) (100 mg, 0.25 mmol, 1 eq) and Cp\* $_2$ Yb(OEt $_2$ ) (265 mg, 0.51 mmol, 2.0 eq). Within 5 minutes, the resulting brown suspension gave a black solution. A gaseous evolution was also concurrently observed. The solution was stirred for 30 minutes at room temperature before being filtered. The solution was concentrated and left overnight in the freezer at  $-40\text{ }^{\circ}\text{C}$  to obtain brown blocks of **5** suitable for XRD studies. The crystals were dried, washed 5 times with cold pentane, dried again to yield another crop of crystals (total amount of crystalline material: 36 mg, 0.03 mmol, 12% yield). The washing solutions were evaporated and the solid was re-dissolved in toluene. Upon concentration and crystallisation, an additional amount of clean crystals can be obtained.  $^1\text{H NMR}$  (300 MHz, THF- $d_8$ ):  $\delta$  (ppm): 228.25 (s, 2H, pyridyl), 116.84 (s, 2H, pyridyl), 25.78 (s, 2H, pyridyl), 24.89 (s, 2H, pyridyl), 9.02 (s, 60H, Cp\*). Anal. Calculated for  $\text{C}_{50}\text{H}_{66}\text{N}_2\text{PdYb}_2$ : C, 52.24; H, 5.96; N, 2.44. Found: C, 52.08; H, 6.07; N, 3.53.

**[Cp\* $_2$ Yb( $\mu$ -Me) $_2$ PdCp\*] (6)** and **Cp\*Yb(thf)[Cp\* $_2$ Yb(bimpm)] $_2$  (7)** are obtained as side-products in the above reaction. The products **6** and **7** were isolated from the last crystallization fractions in toluene. **6** can be obtained as the major product following an extraction in diethyl ether and evaporation of the solvent under reduced pressure.  $^1\text{H NMR}$  (300 MHz, Tol- $d_8$ ):  $\delta$  (ppm): 388.22 (s, 6H, Me), 4.10 (s, 30H, Cp\*Yb), -11.34 (s, 15H, Cp\*Pd). No elemental analysis have been obtained.

## II. $^1\text{H}$ NMR

### 1. Complex 1

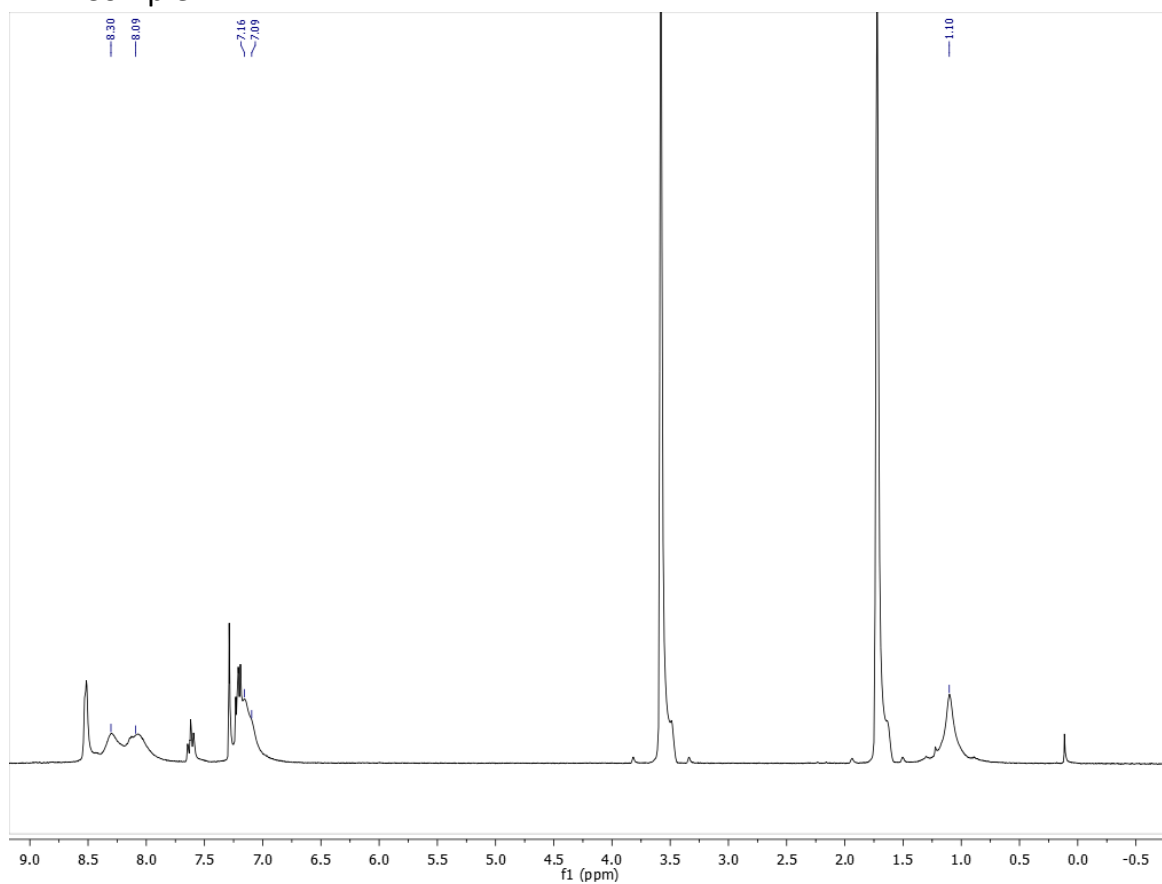

**Figure S1.**  $^1\text{H}$  NMR of complex 1 in  $\text{THF-d}_8$  at 333 K. The NMR spectrum was recorded at this temperature to sharpen the signals.

2. Compounds 2 and 3  
a) NMR of compounds

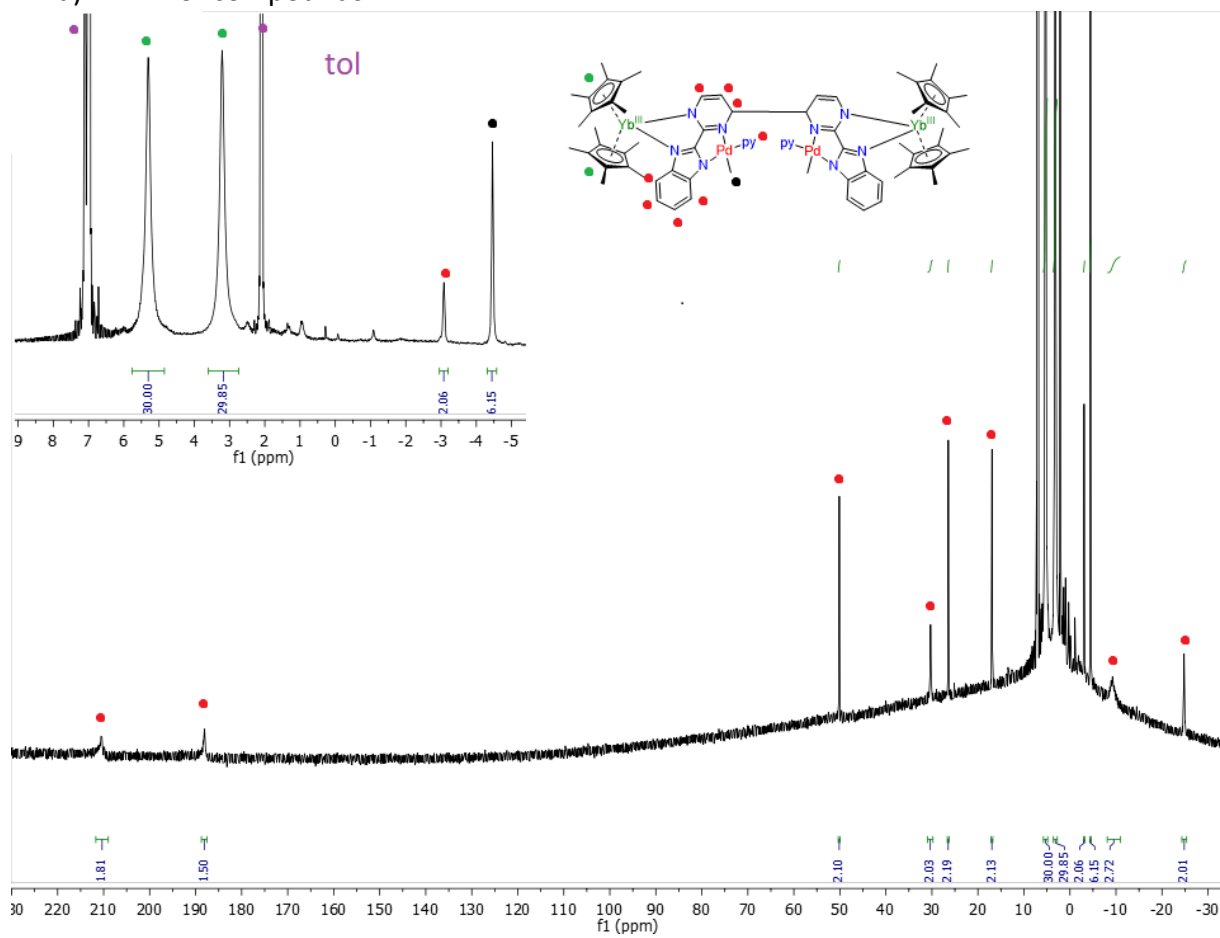

Figure S2.  $^1\text{H}$  NMR of 2 in  $\text{tol-}d_8$  at 293 K.



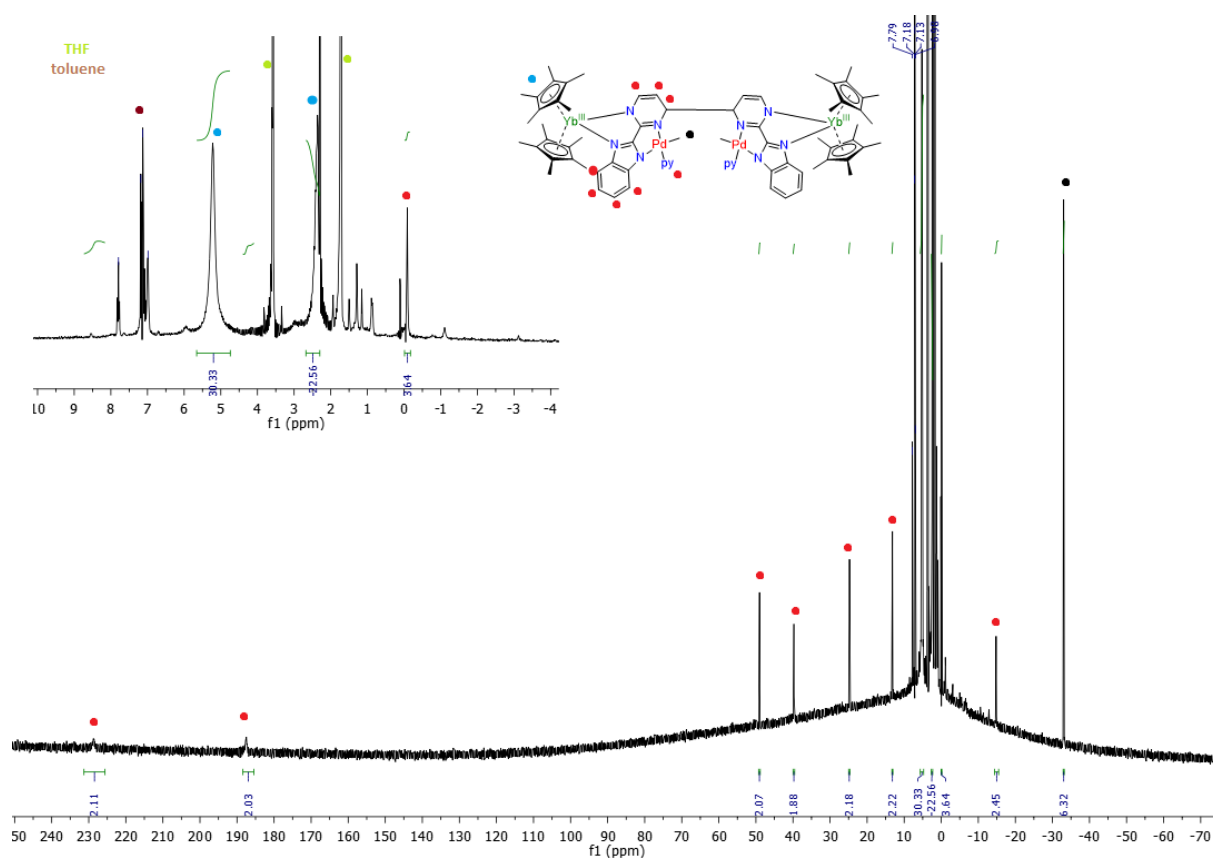

Figure S3.  $^1\text{H}$  NMR of **3** in  $\text{THF-d}_8$  at 293 K.

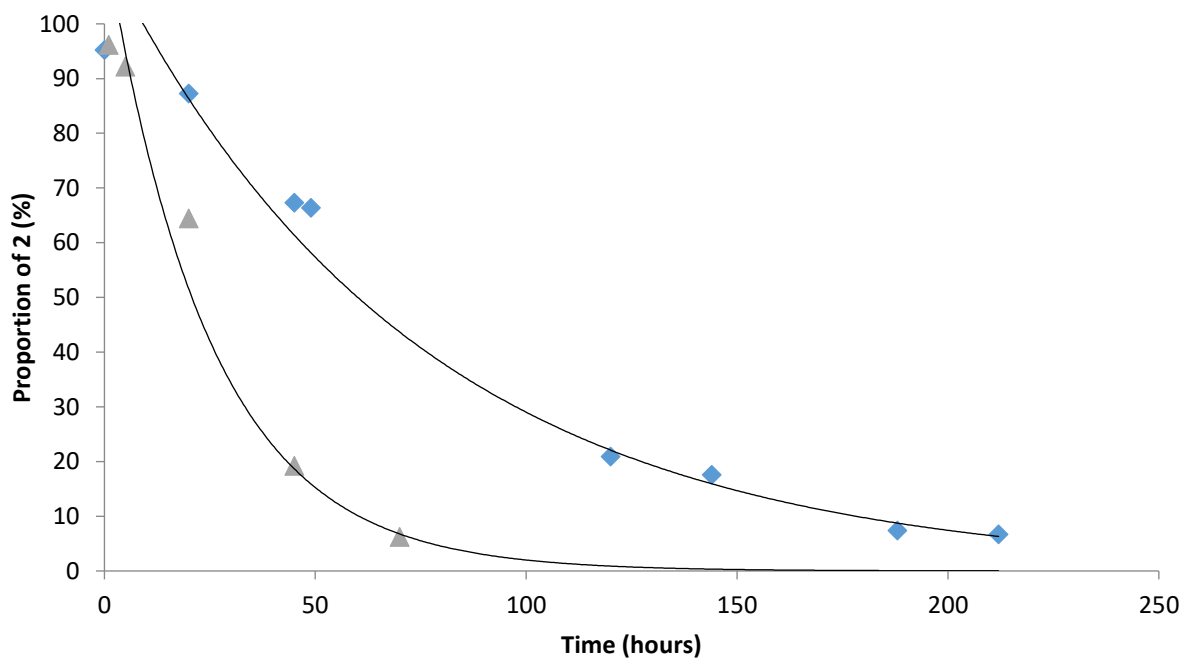

Figure S4. Time evolution (hours) of the clean isomerisation of **2** to **3** without (blue lozenges) and with stirring (grey triangles).

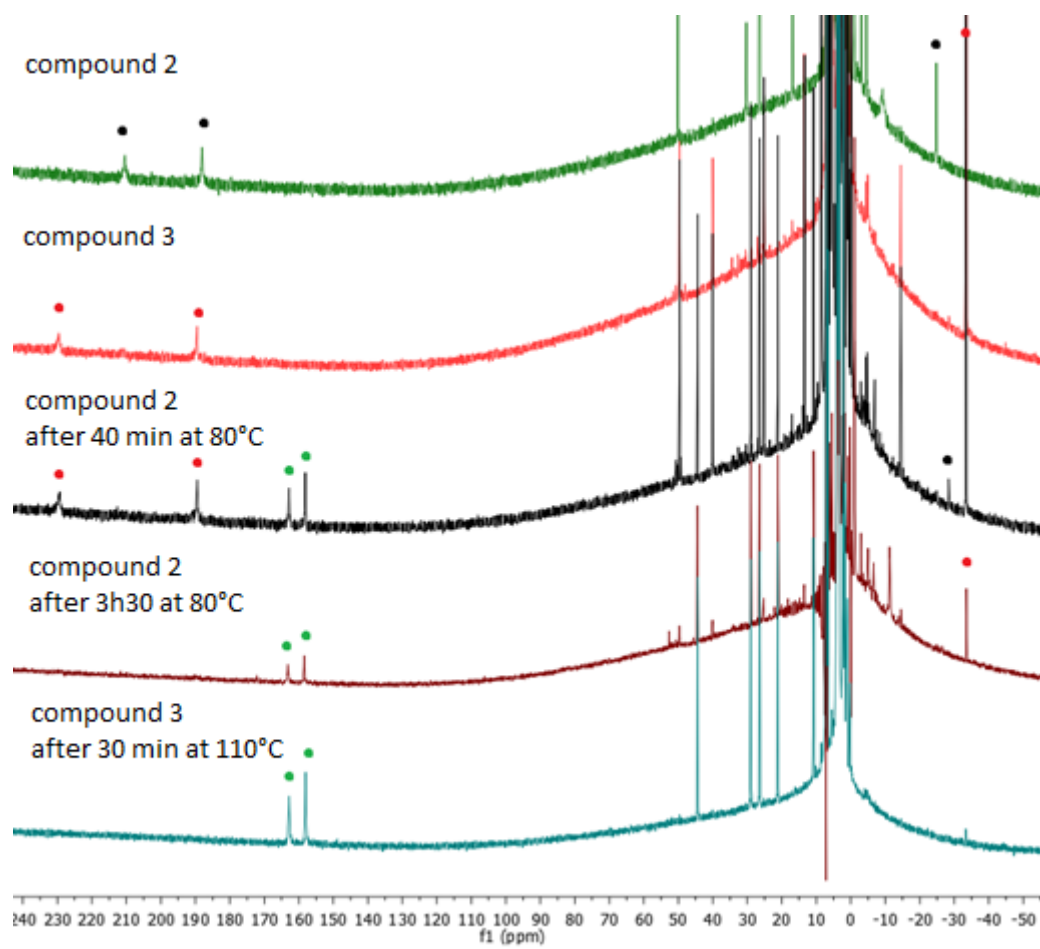

*Figure S5. The effect of heating on compounds 2 (black dots) and 3 (red dots). An unknown, but identical product, is formed in both cases (green dots).*

b) *In situ* studies of addition of  $\text{Cp}^*\text{Yb}(\text{OEt}_2)$

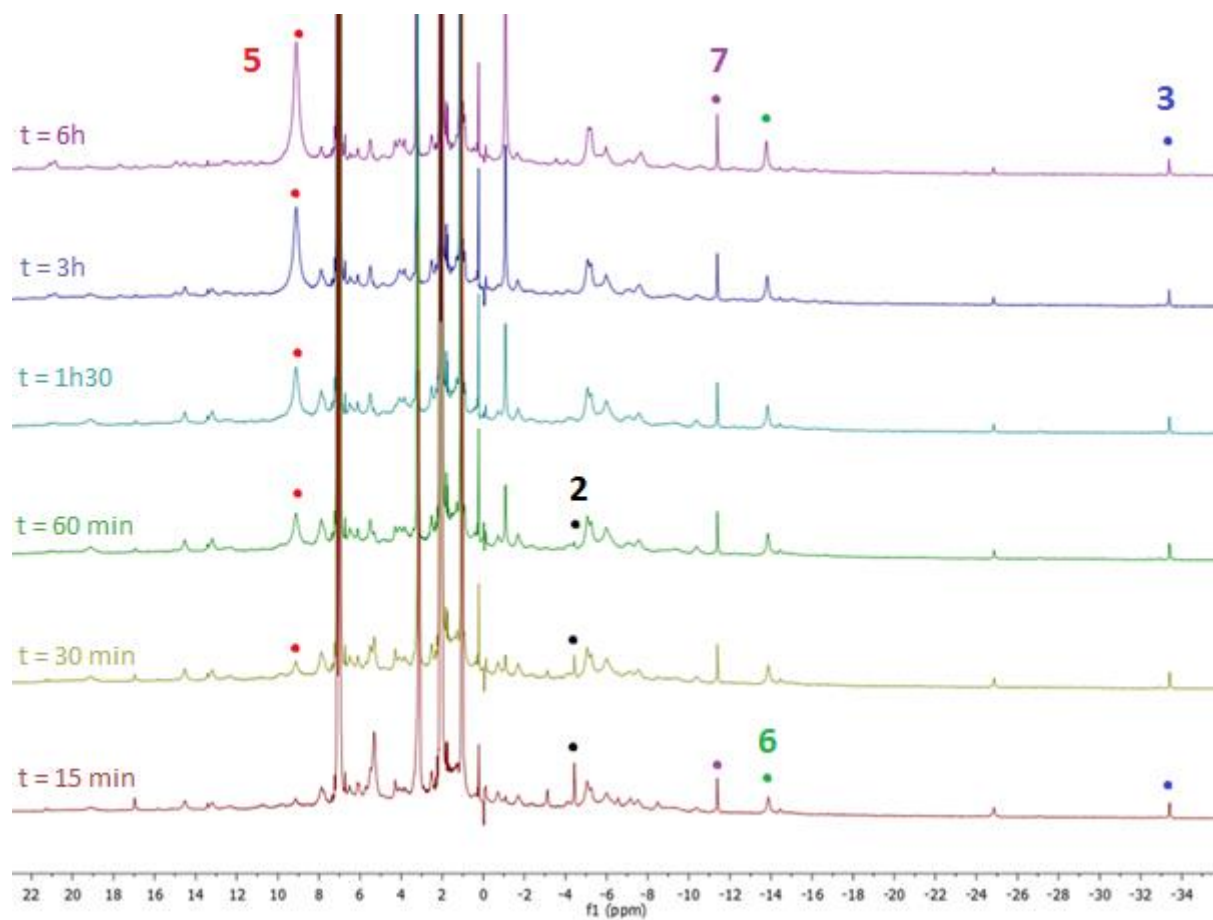

**Figure S6.** *In situ* study of the addition of  $\text{Cp}^*\text{Yb}(\text{OEt}_2)$  to **2** over different reaction times. The signals consistent with the formation of **5**, **6** and **7** can be noted.

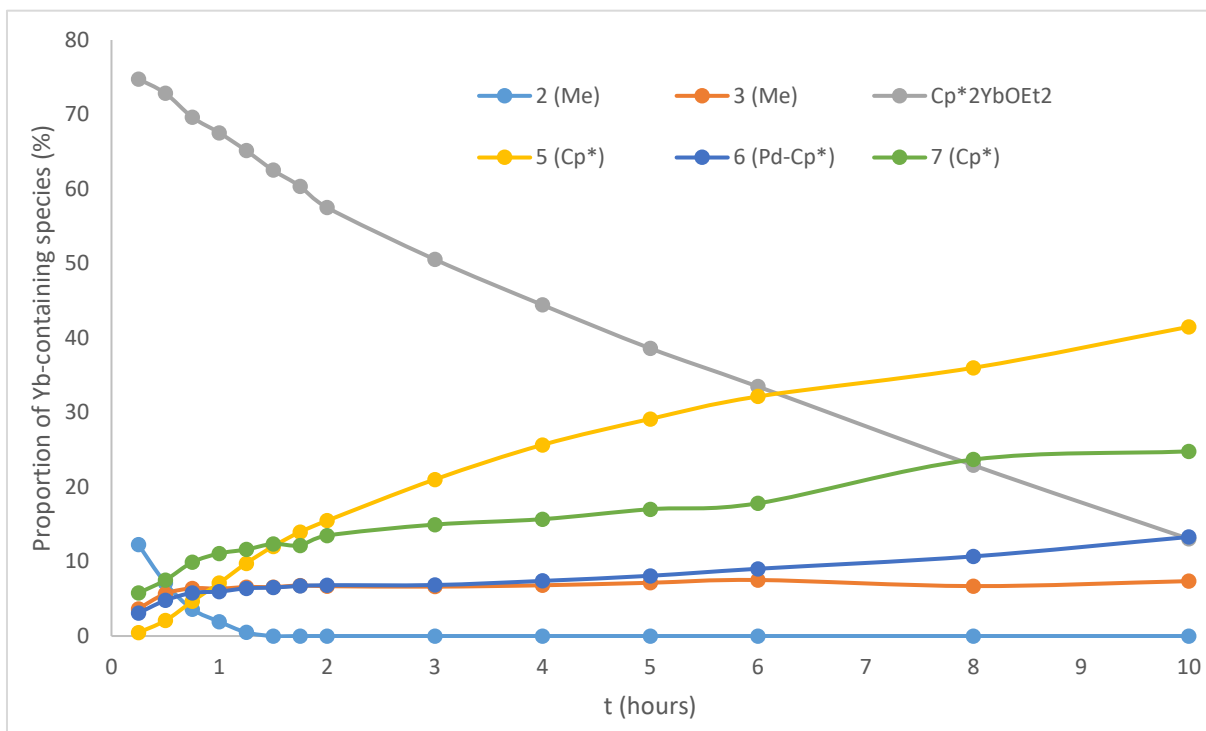

**Figure S7.** In situ qualitative study of the addition of  $\text{Cp}^*_2\text{Yb}(\text{OEt})_2$  to **2**. For every compound, whenever possible, the signal with the cleanest integration was chosen. All the compounds were integrated with respect to an internal reference. Lines are only for guiding the eye.

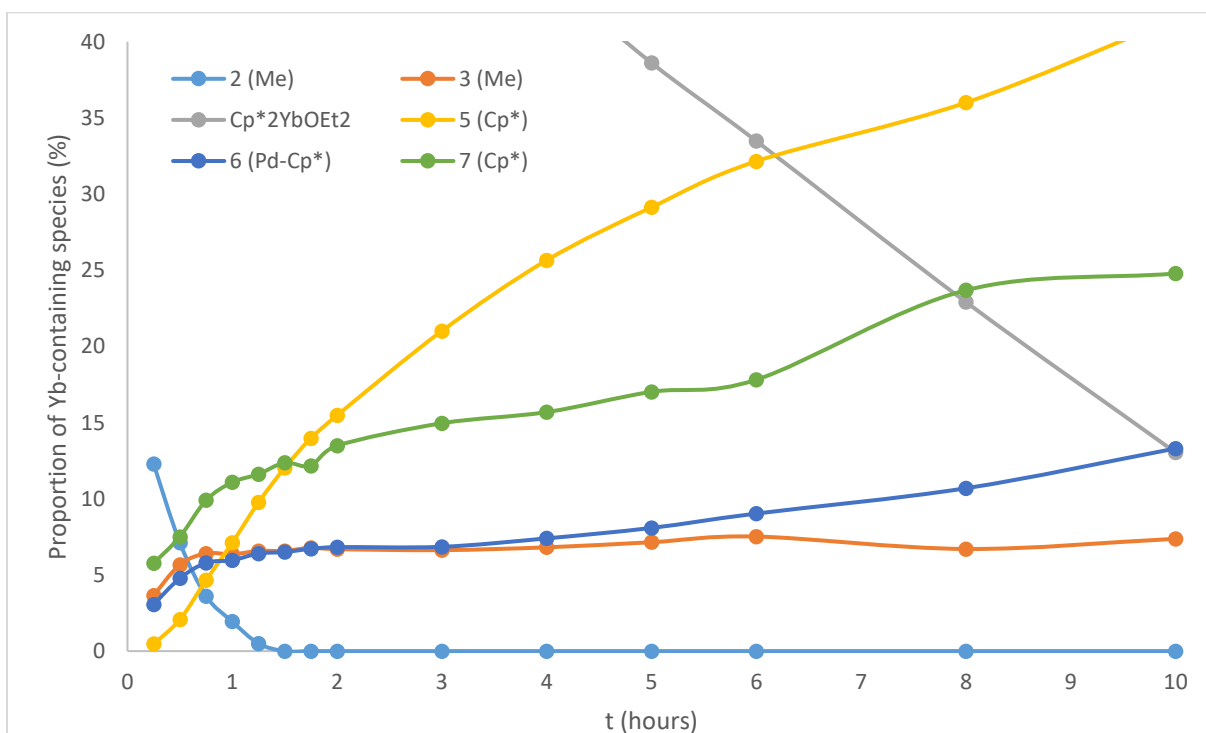

**Figure S8.** In situ qualitative study of the addition of  $\text{Cp}^*_2\text{Yb}(\text{OEt})_2$  to **2**. For every compound, whenever possible, the signal with the cleanest integration was chosen. All the compounds were integrated with respect to an internal reference. Lines are only for guiding the eye.

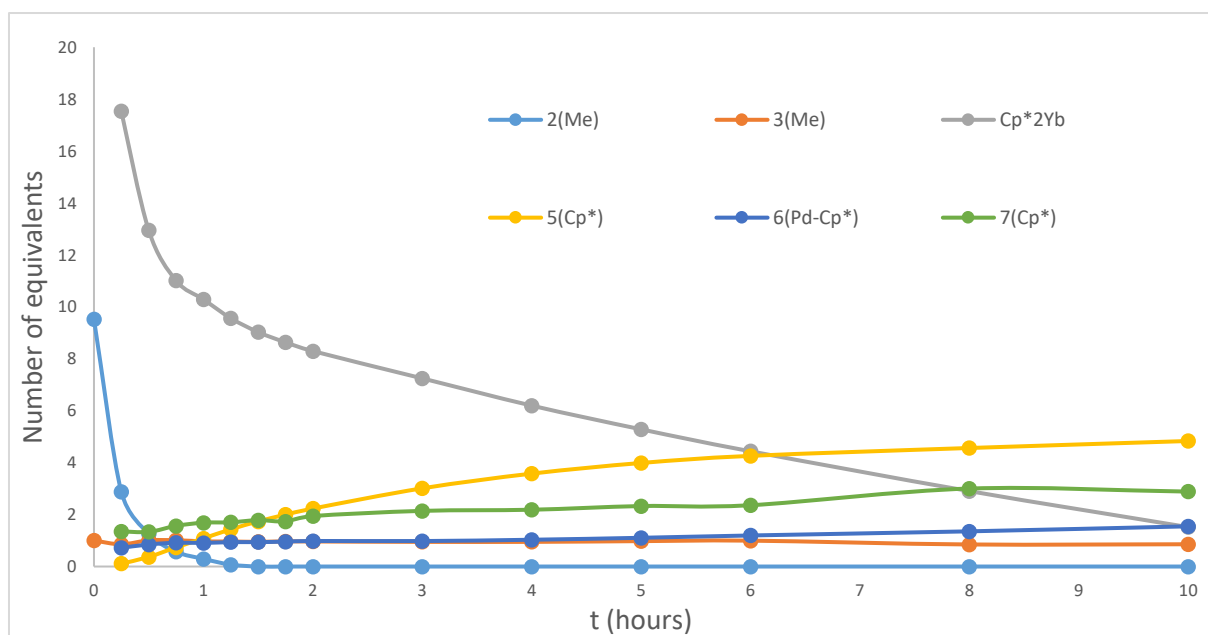

Kinetic study of the reaction between **2** and an excess of ytterbocene in *tol-d*<sub>8</sub>. *t*<sub>0</sub> is the scan prior to the addition of ytterbocene, included to show the relative proportions of **2** and **3** in the initial mixture. For every compound, whenever possible, the signal with the cleanest integration was chosen. All the compounds were integrated with respect to an internal reference. Lines are only for guiding the eye.

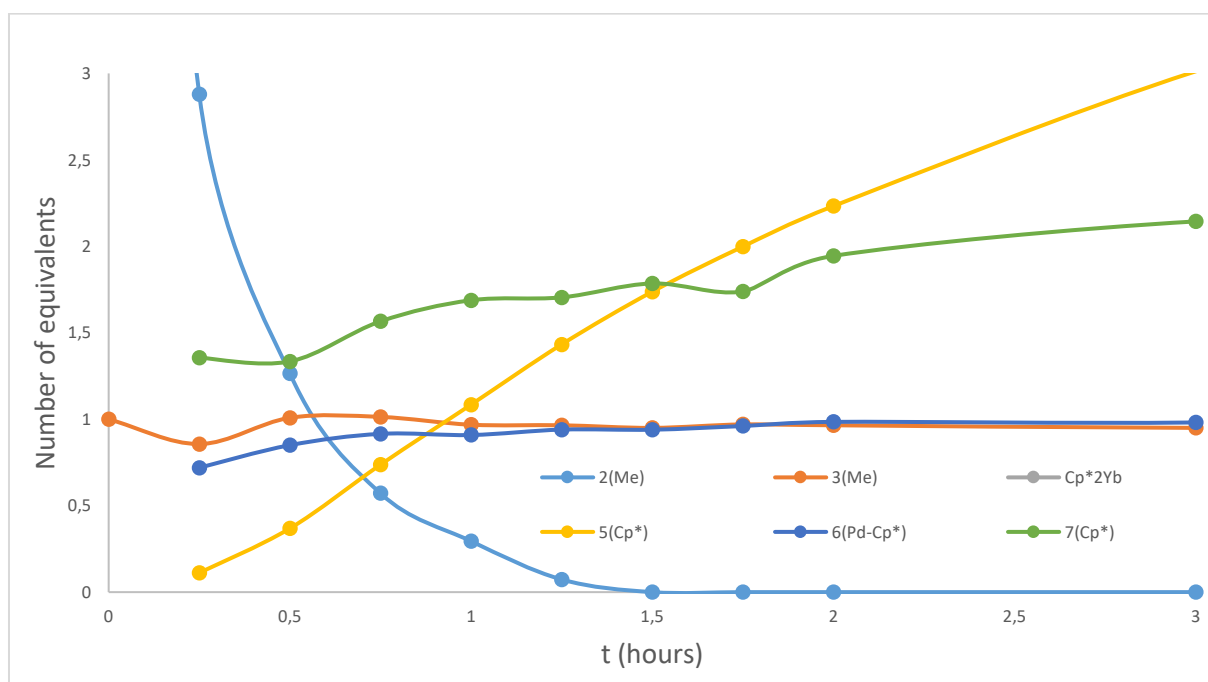

Kinetic study of the reaction between **2** and an excess of ytterbocene in *tol-d*<sub>8</sub> – zoom into the evolution for the first three hours. *t*<sub>0</sub> is the scan prior to the addition of ytterbocene, included to show the relative proportions of **2** and **3** in the initial mixture. For every compound, whenever possible, the signal with the cleanest integration was chosen. All the compounds were integrated with respect to an internal reference. Lines are only for guiding the eye.

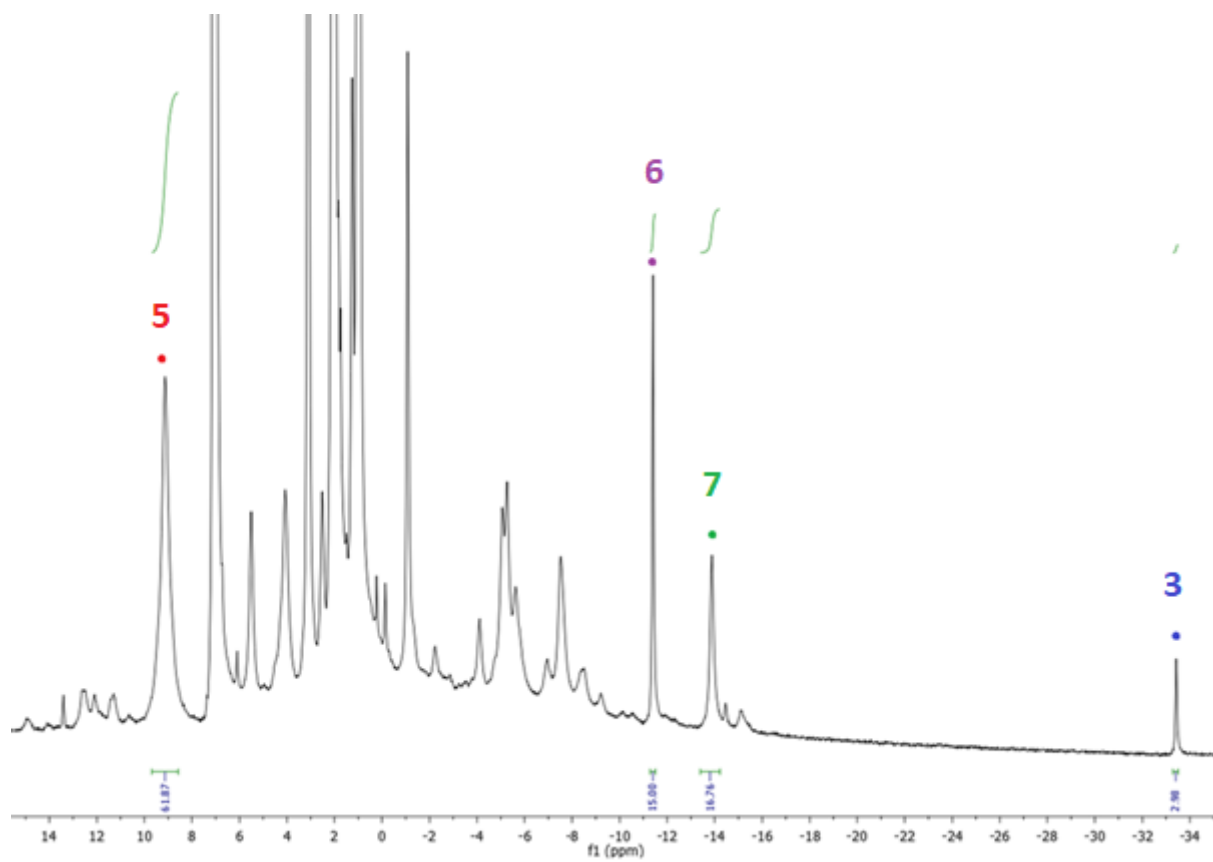

**Figure S9.** *In situ* qualitative study of the addition of  $\text{Cp}^*\text{Yb}(\text{OEt})_2$  to **3** after two weeks. The signals consistent with the formation of **5**, **6** and **7** are observed. Note that after two weeks, not all the starting material is consumed.

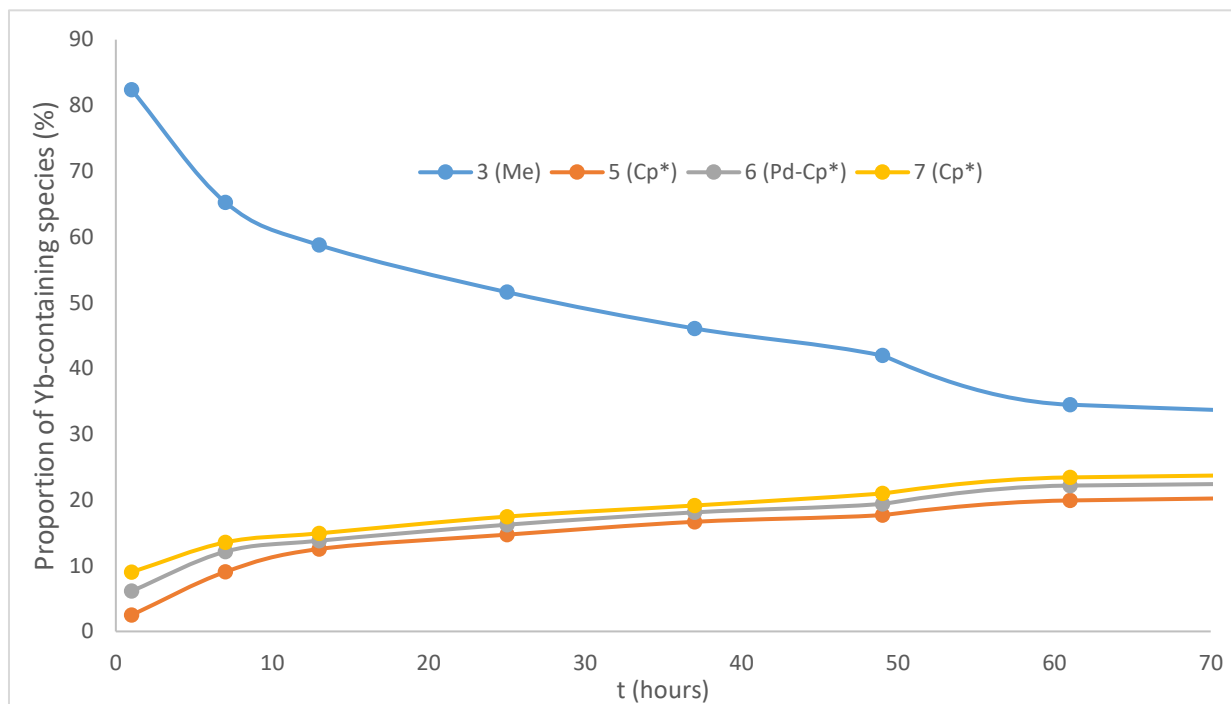

**Figure S10** : In-situ qualitative study of the addition of  $\text{Cp}^*_2\text{Yb}(\text{OEt}_2)$  to **3**. All the compounds were integrated with respect to an internal reference. Lines are only for guiding the eye. Due to the lesser solubility of the compound, a reliable integration of the  $\text{Cp}^*_2\text{Yb}(\text{OEt}_2)$  was not possible.

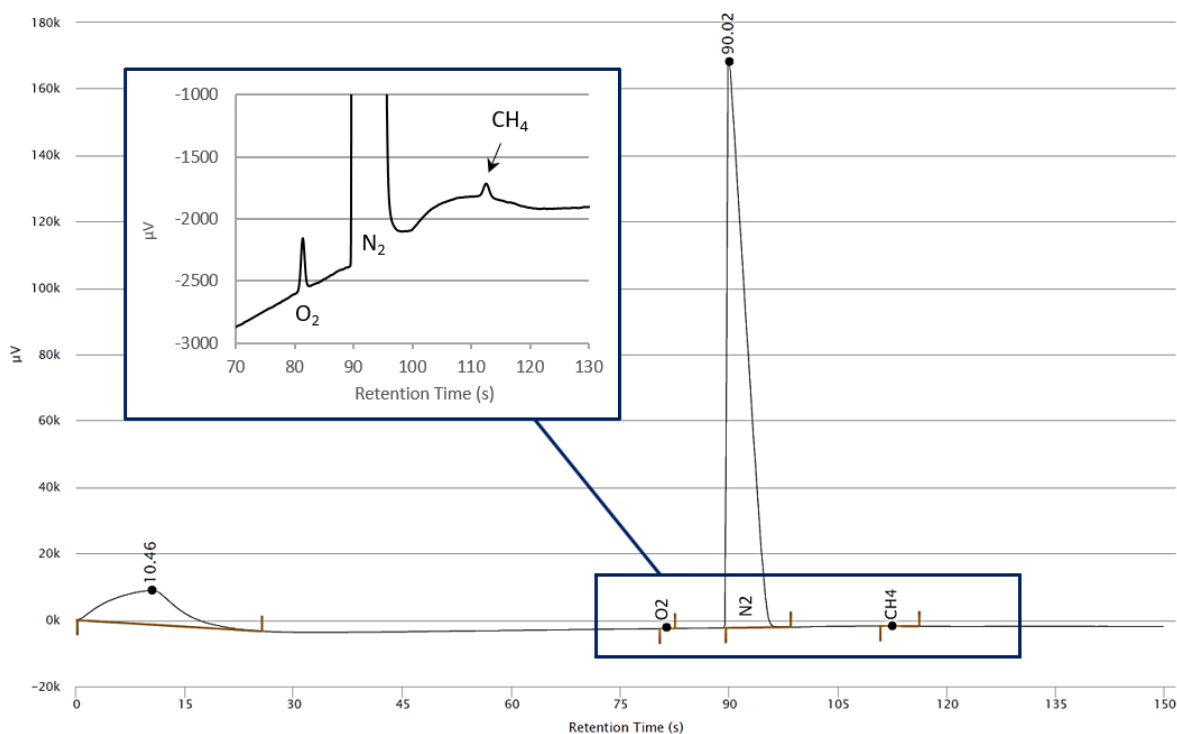

**Figure S11** : Gas evolution GC analysis by addition of  $\text{Cp}^*_2\text{Yb}(\text{OEt}_2)$  to **3**.

### 3. Complex 4

#### a) NMR of compounds

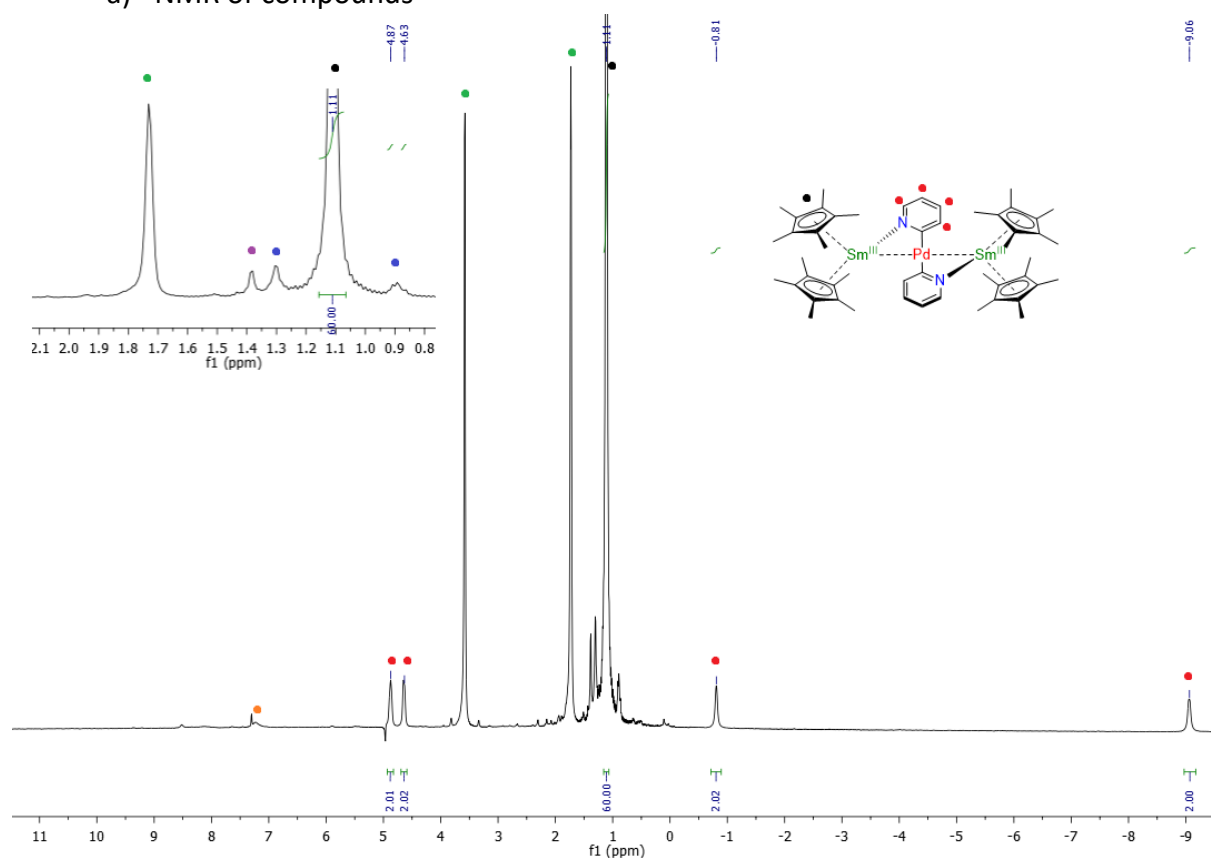

**Figure S12.**  $^1\text{H}$  NMR of 4 in  $\text{THF-d}_8$  at 293 K. The pyridyl signals are marked by red dots, the Cp\* signal by a black dot. The trace impurities have the following colours: residual protio solvent signals – green, n-pentane – blue, toluene – orange, unknown impurity – purple.



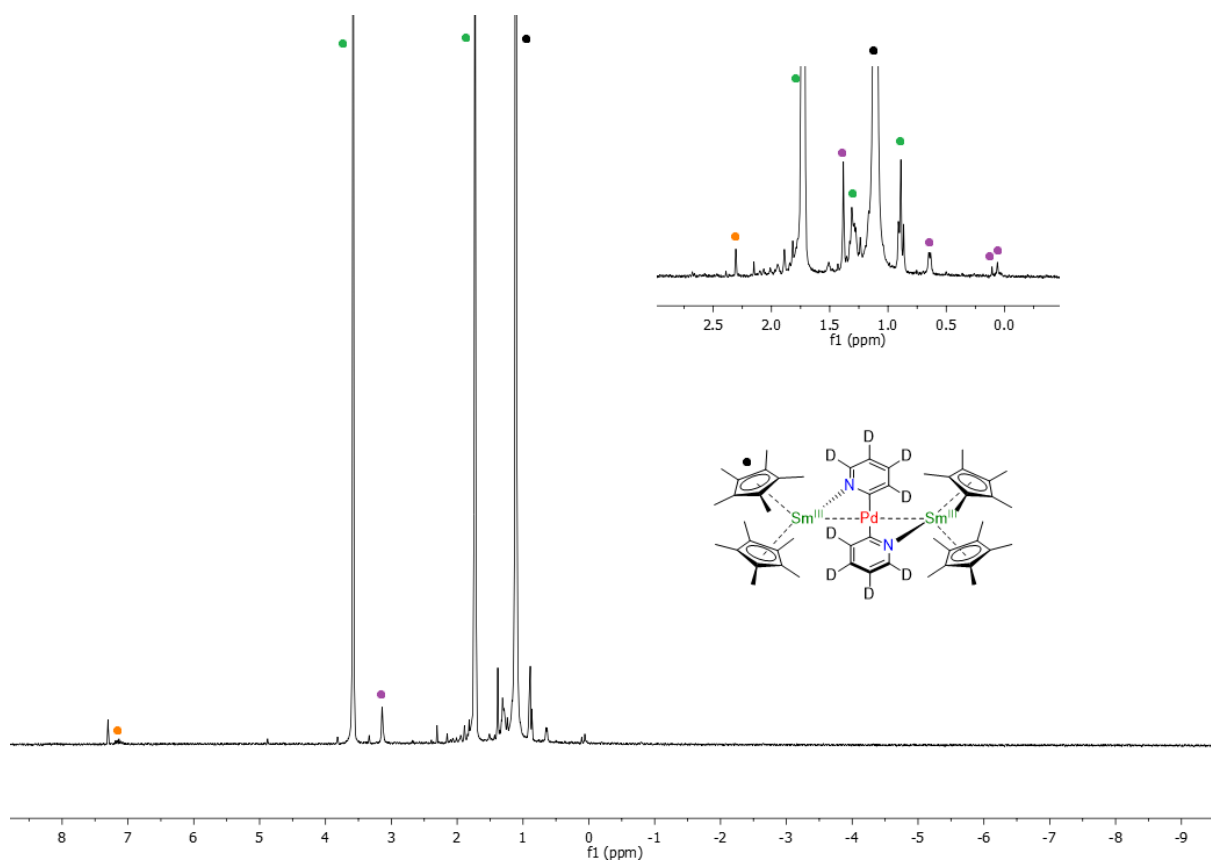

**Figure S13.**  $^1\text{H}$  NMR of the complex **4-py-d<sub>4</sub>** in  $\text{THF-d}_8$  at 293 K. The Cp\* signal is marked by a black dot. The trace impurities have the following colours: residual protio solvent signals – green, n-pentane – blue, toluene – orange, silicon grease – light brown, unknown impurities – purple.

b) Variable temperature NMR of complex **4**

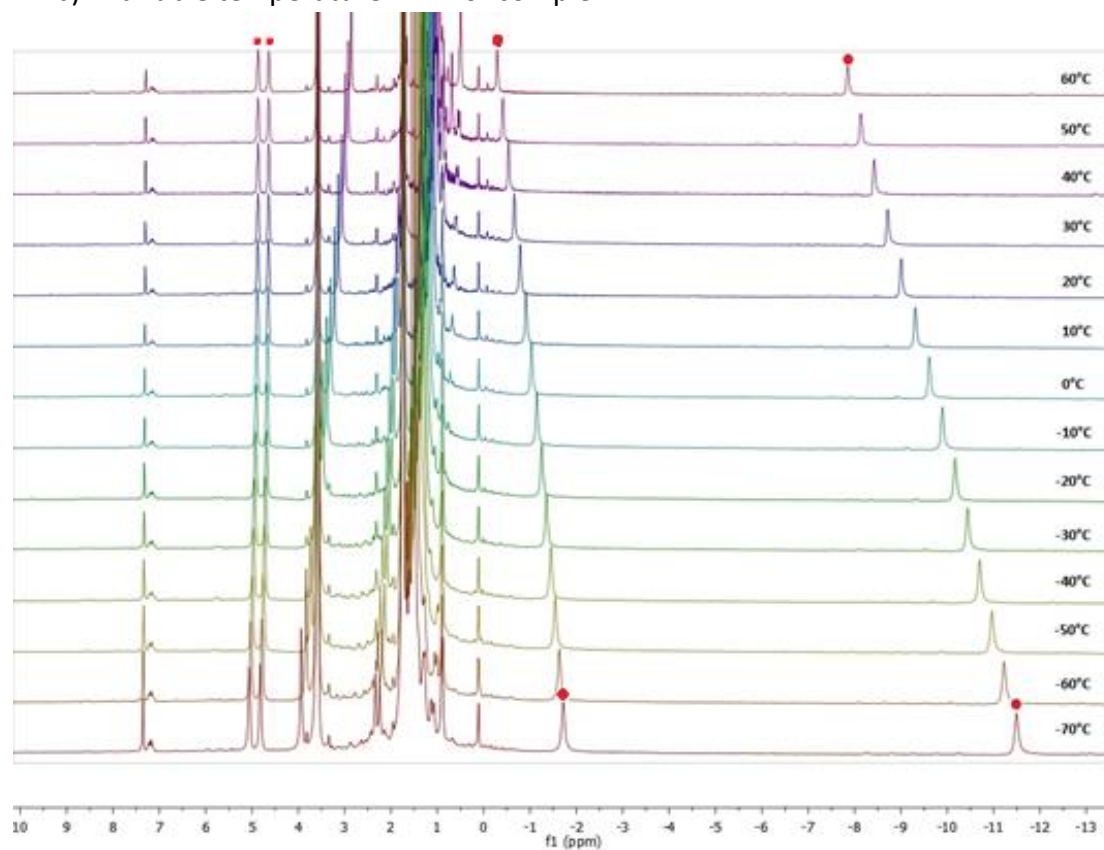

**Figure S14.** Variable temperature  $^1\text{H}$  NMR of **4** in  $\text{THF-d}_8$ . Pyridyl peaks are marked by red dots.

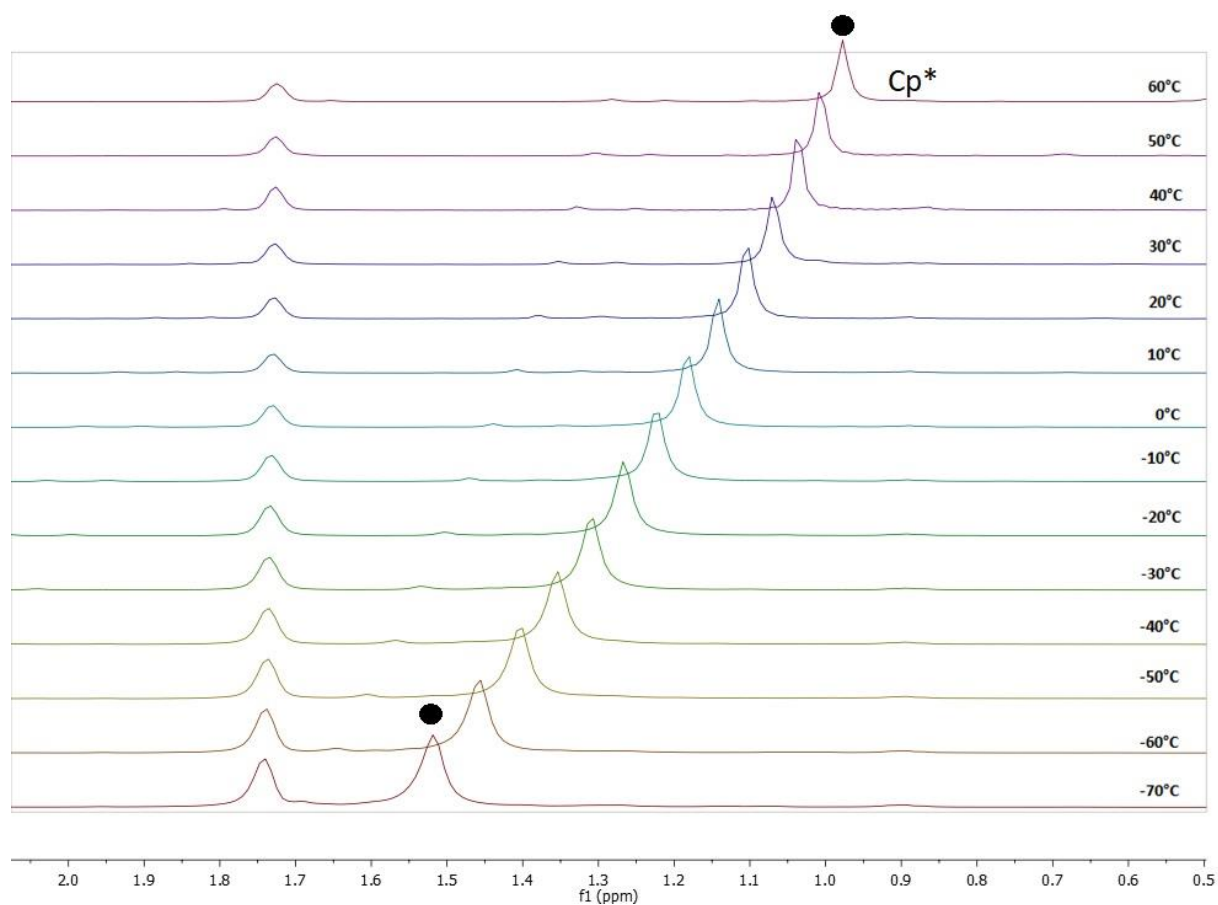

Figure S15. Variable temperature  $^1\text{H}$  NMR of **4** in  $\text{THF-d}_8$  – Following of the Cp\* peak.

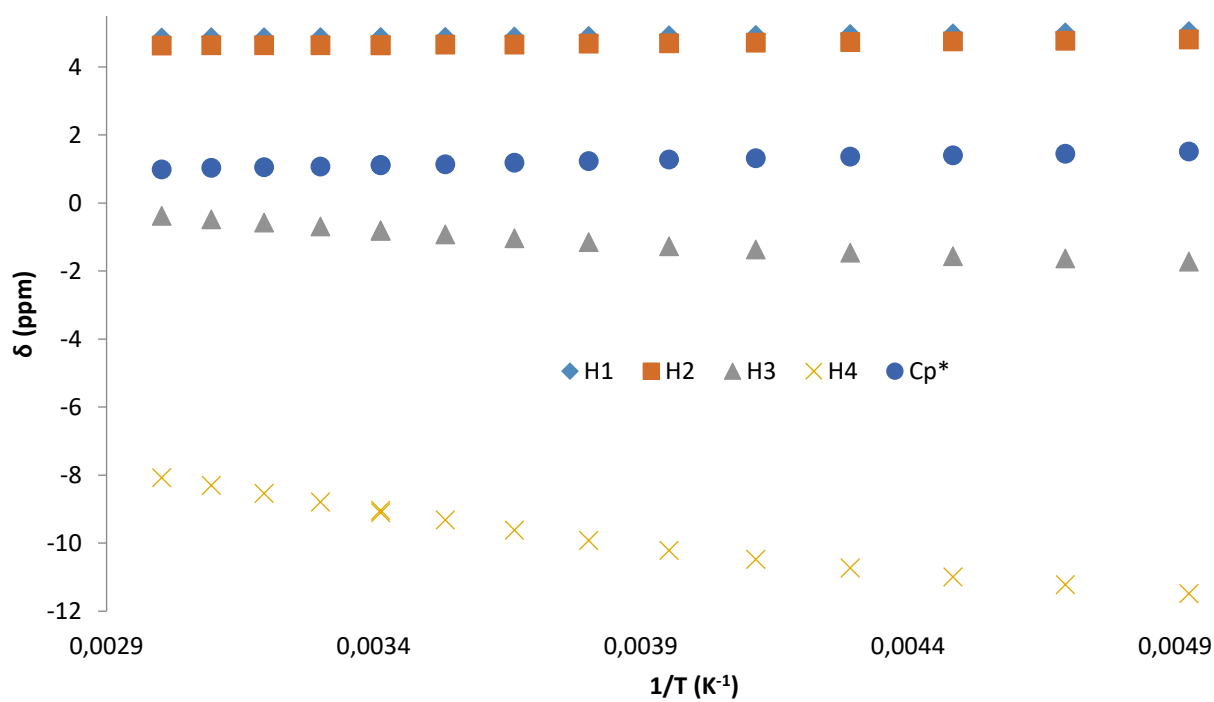

Figure S16.  $\delta$  vs  $1/T$  plot for **4** in  $\text{THF-d}_8$ . H1-H4 indicate the protons on the pyridyl.

c) Formation reactions of compound **4**

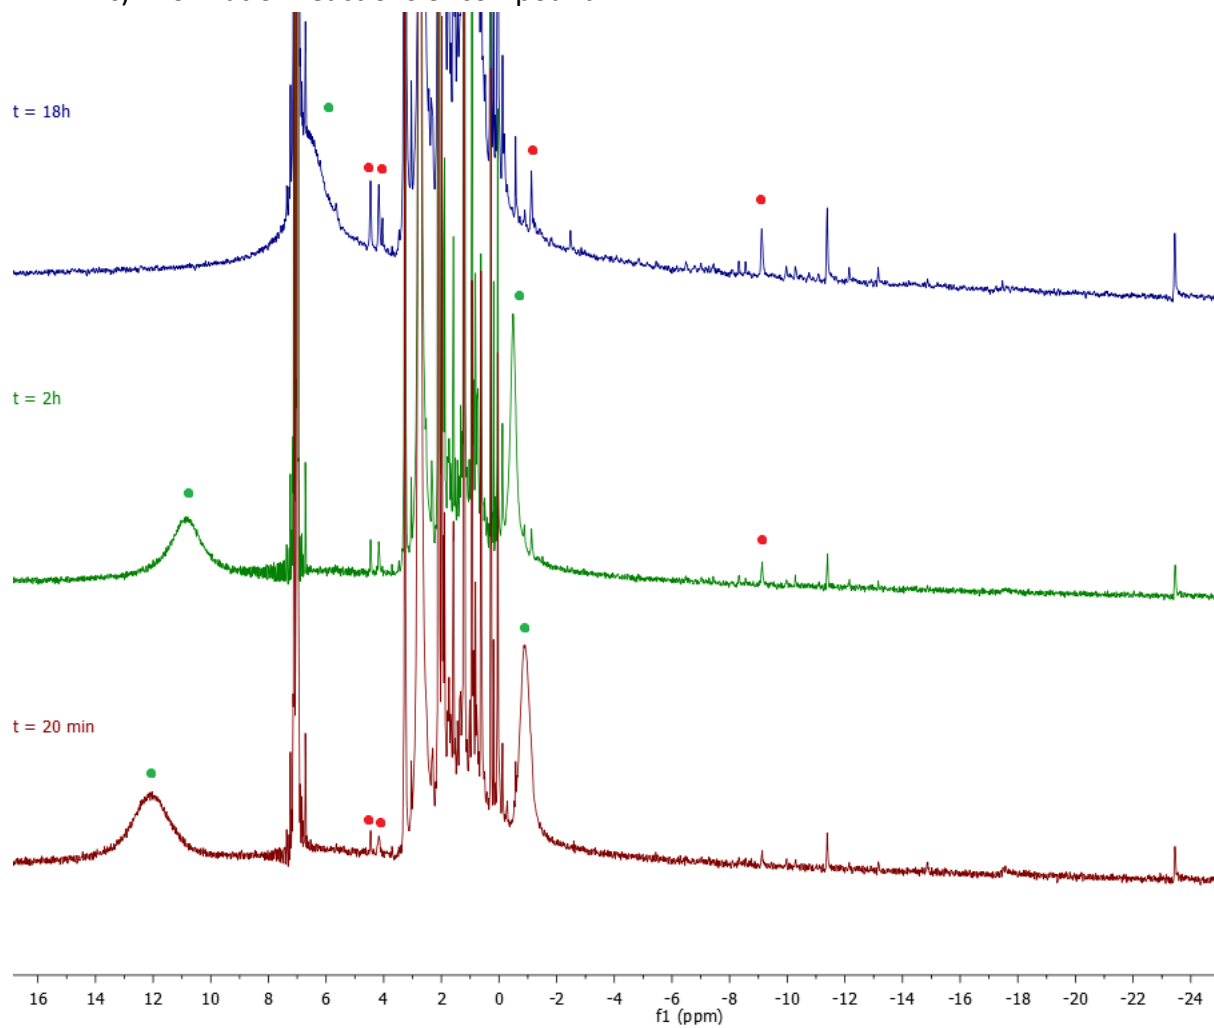

**Figure S17.** In situ formation of **4** using **two equivalents** of Cp\*<sub>2</sub>SmOEt<sub>2</sub> added to **1** in tol-d<sub>8</sub>. Peaks corresponding to **4** are formed within a few minutes. Pyridyl peaks are marked by red dots, Cp\*<sub>2</sub>SmOEt<sub>2</sub> peaks are marked by green dots.

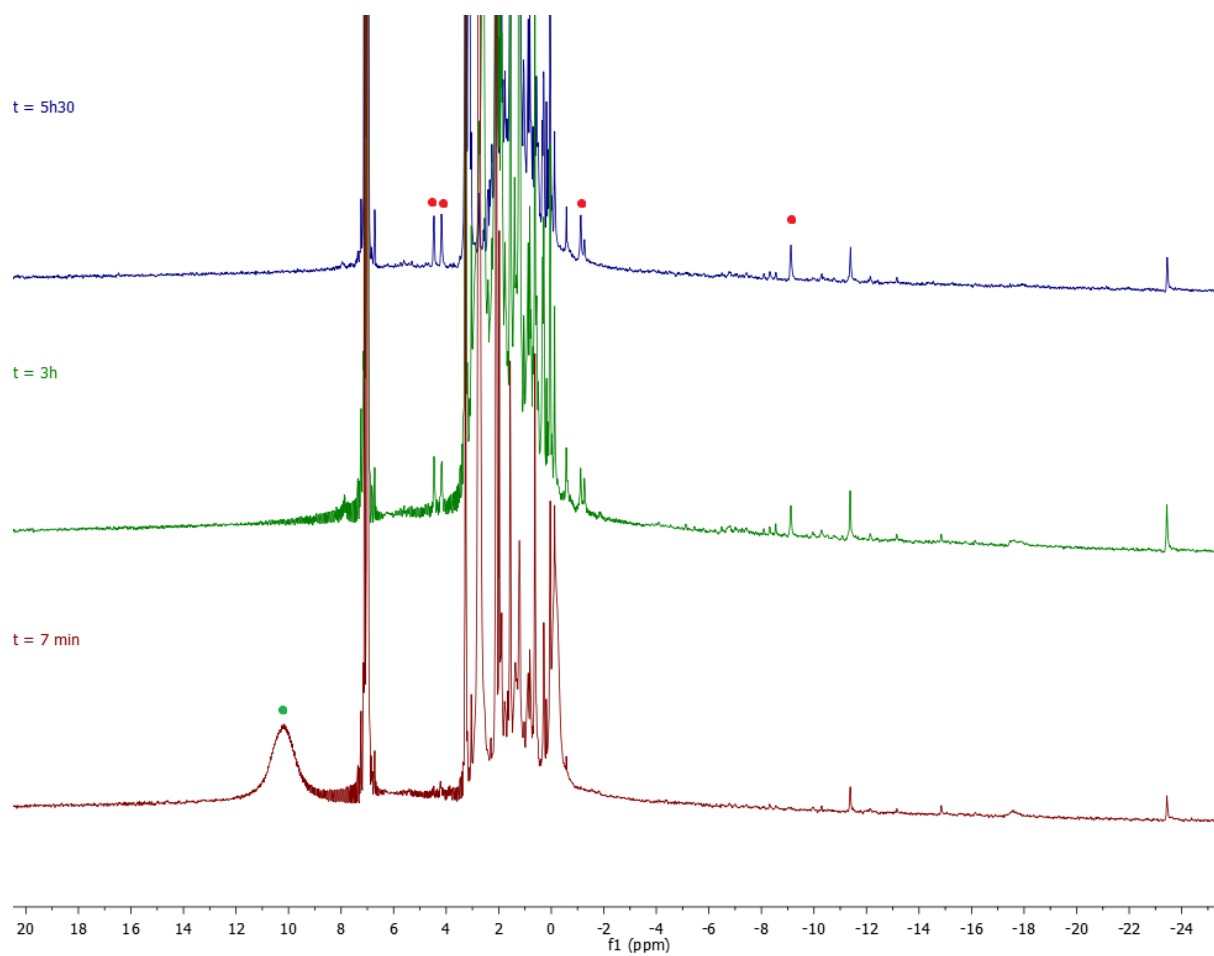

**Figure S18.** In situ formation of **4** using **one equivalent** of  $\text{Cp}^*\text{SmOEt}_2$  added to **1** in  $\text{tol-d}_8$ . Peaks corresponding to **4** are formed within 3 hours. Pyridyl peaks are marked by red dots,  $\text{Cp}^*\text{SmOEt}_2$  peaks are marked by green dots.

## 4. Complex 5

### a) NMR of compounds

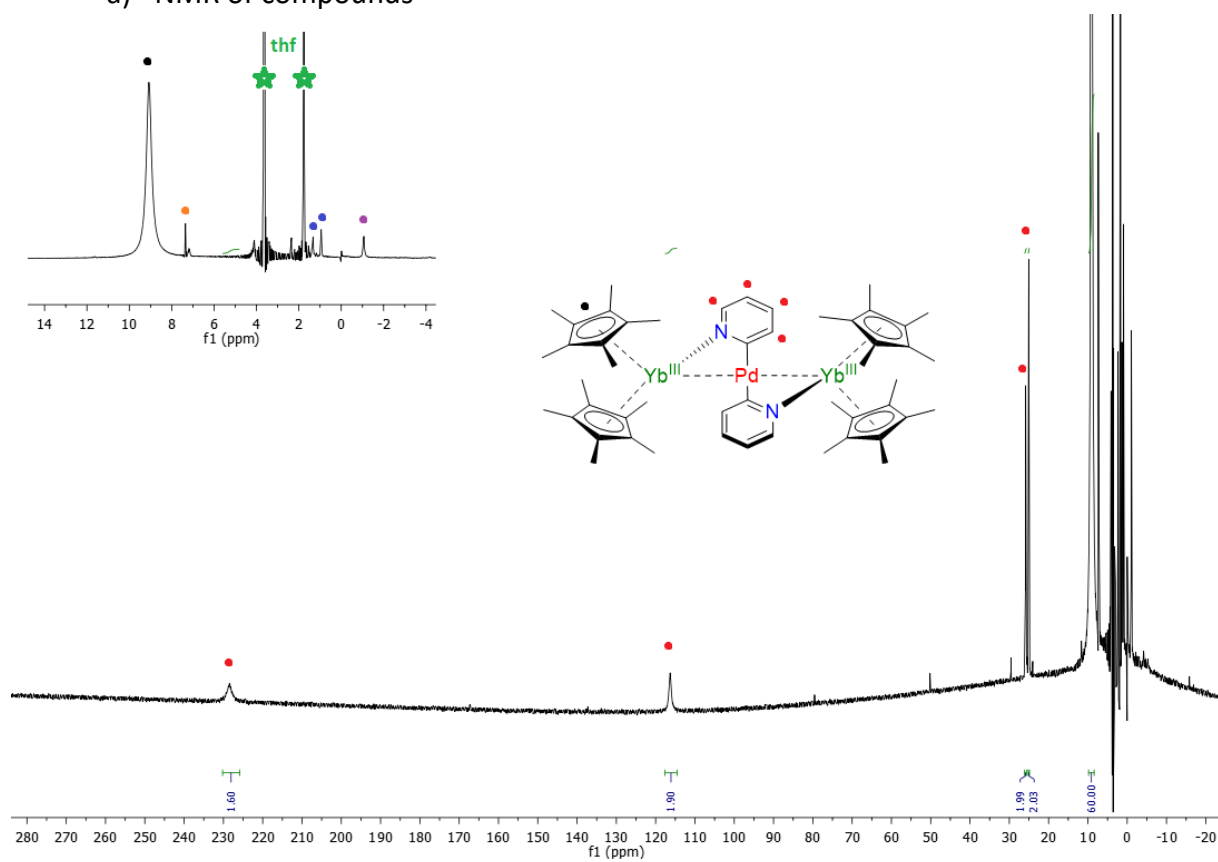

**Figure S19.**  $^1\text{H}$  NMR of complex 5 in  $\text{THF-d}_8$  at 293 K. Red dots indicate the pyridyl peaks, the black dot indicates the Cp\* peak, the blue peak indicates H grease, the orange dot residual toluene and the purple peak indicates an unknown impurity.

b) Variable temperature NMR of complex 5

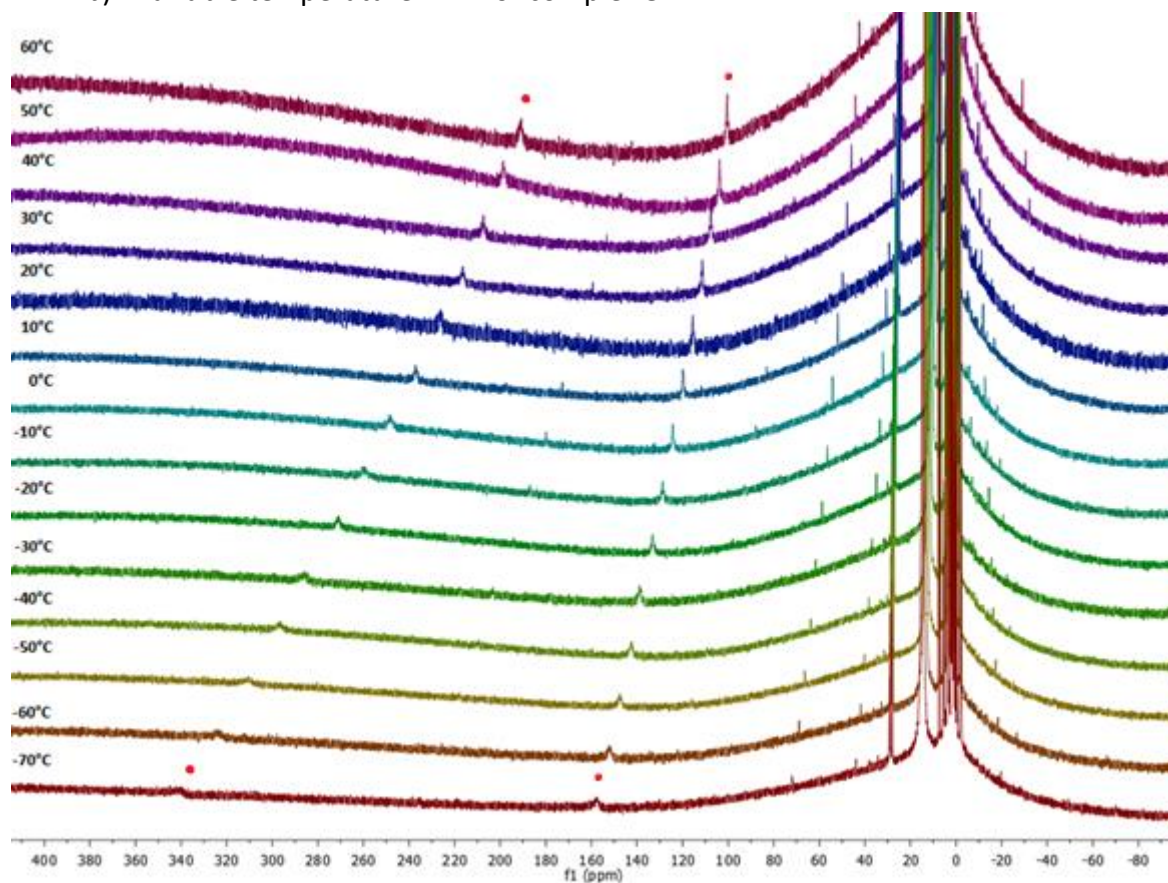

Figure S20. Variable temperature  $^1\text{H}$  NMR of 5 in  $\text{THF-d}_8$ . Red dots correspond to the pyridyl.

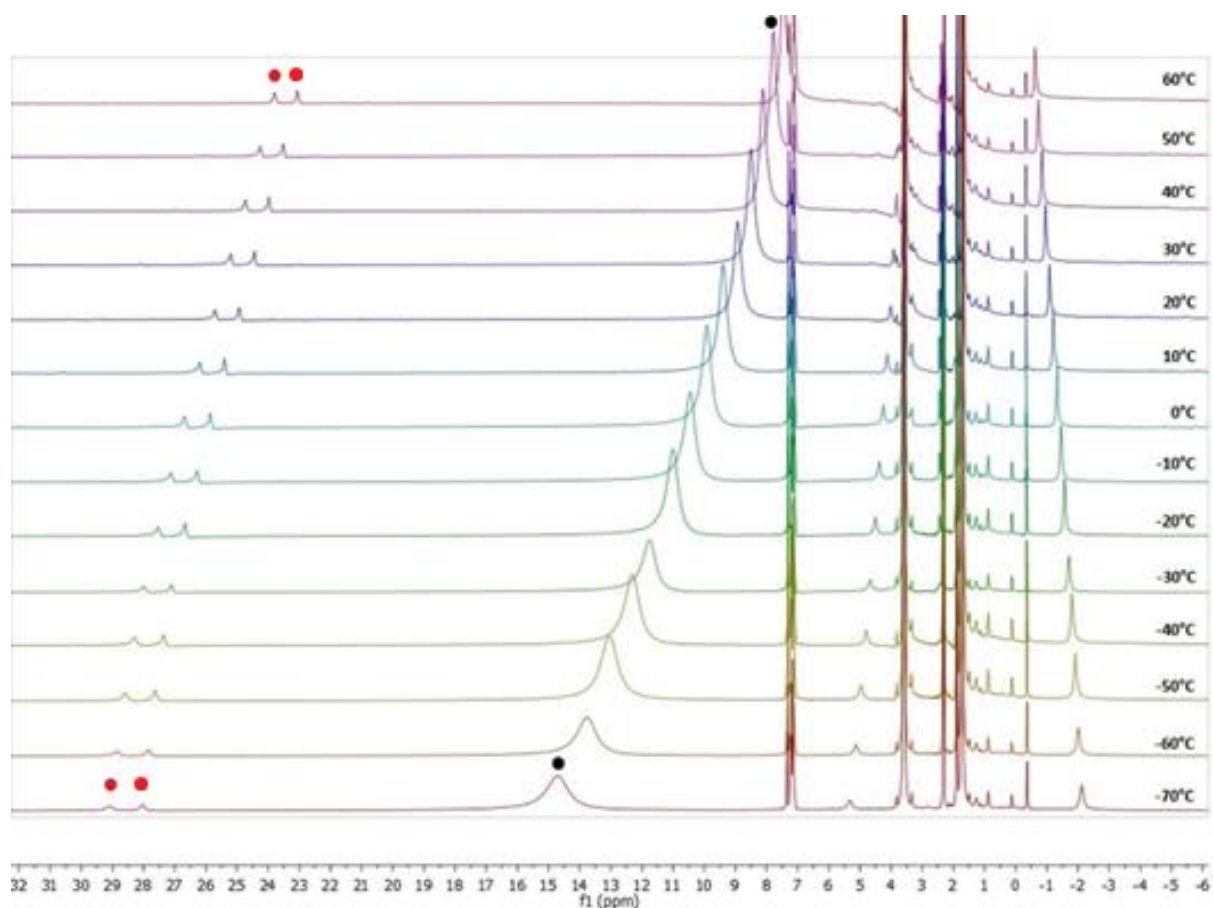

**Figure S21.** Variable temperature  $^1\text{H}$  NMR of **5**. Zoom in the -6 to +32 ppm range. Red dots correspond to the pyridyl and the black dot corresponds to the  $\text{Cp}^*$ .

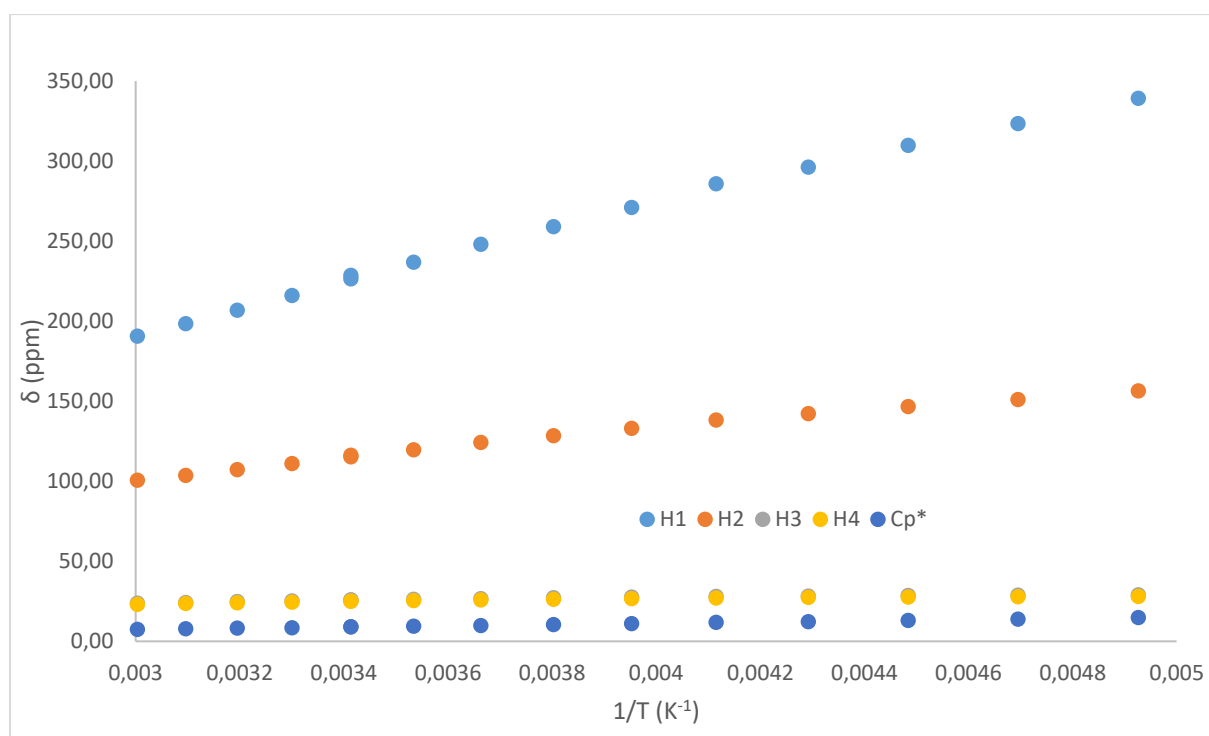

**Figure S22.**  $\delta$  vs  $1/T$  plot for **5** in  $\text{THF-d}_8$ . H1-H4 indicate the protons on the pyridyl.



c) *In situ* formation reactions of **5**

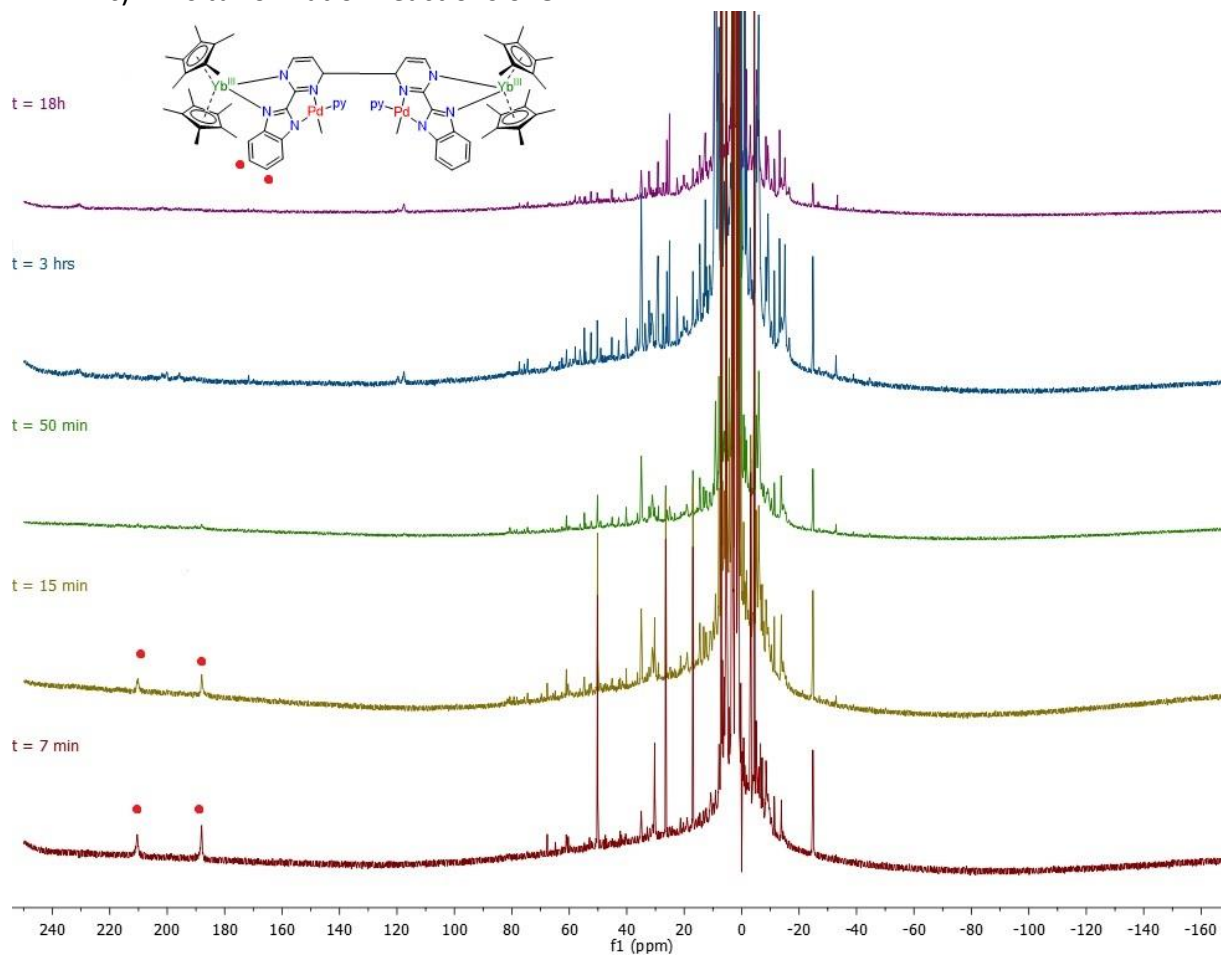

**Figure S23.** *In situ* formation of **5** using **one equivalent** of Cp\*<sub>2</sub>YbOEt<sub>2</sub> added to **1** in tol-d<sub>8</sub> at 293 K over different periods of time.

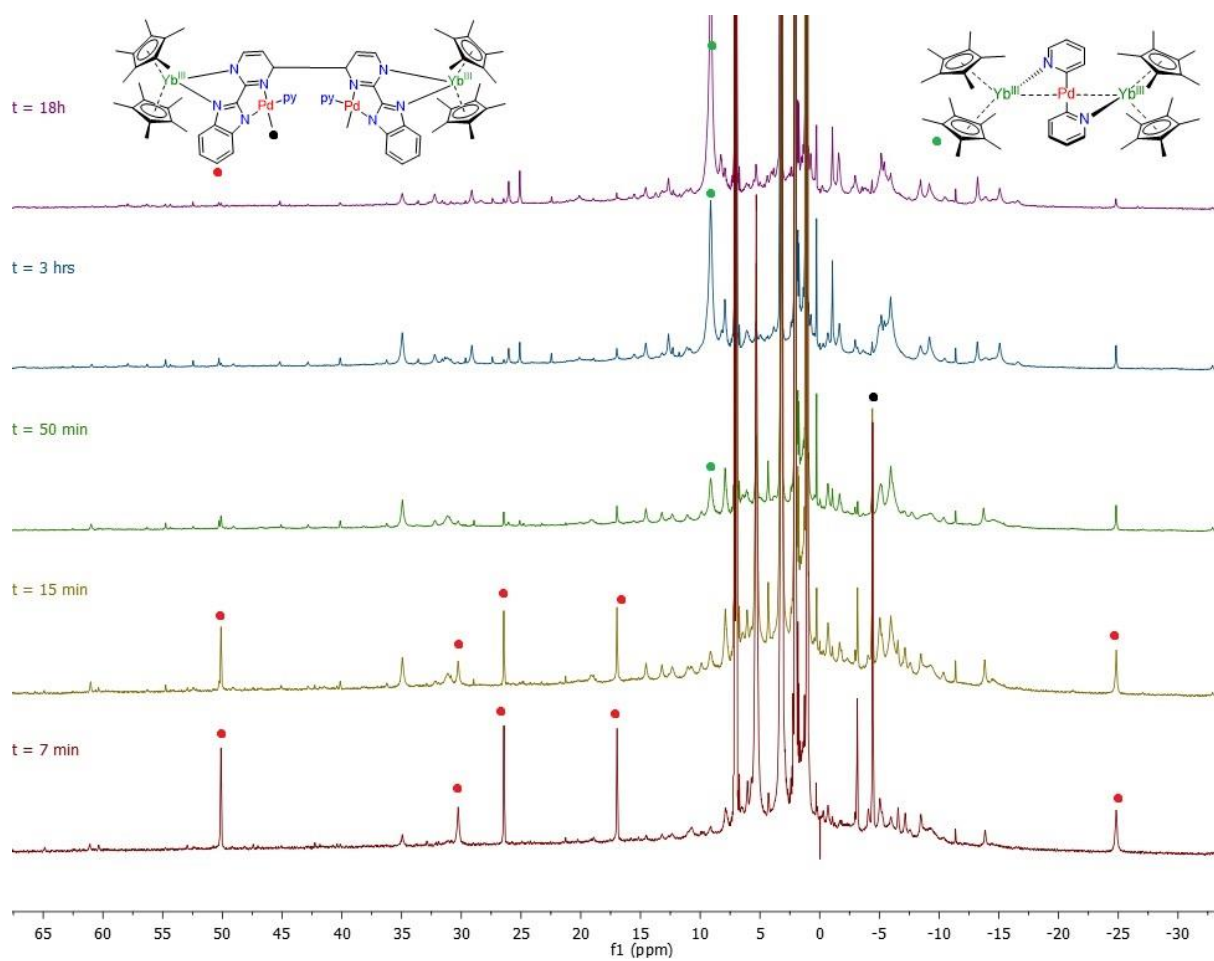

**Figure S24.** In situ formation of **5** using **one equivalent** of  $\text{Cp}^*_2\text{YbOEt}_2$  added to **1** in  $\text{tol-}d_8$  at 293 K over different periods of time. Zoom in the -30 to +65 ppm range.

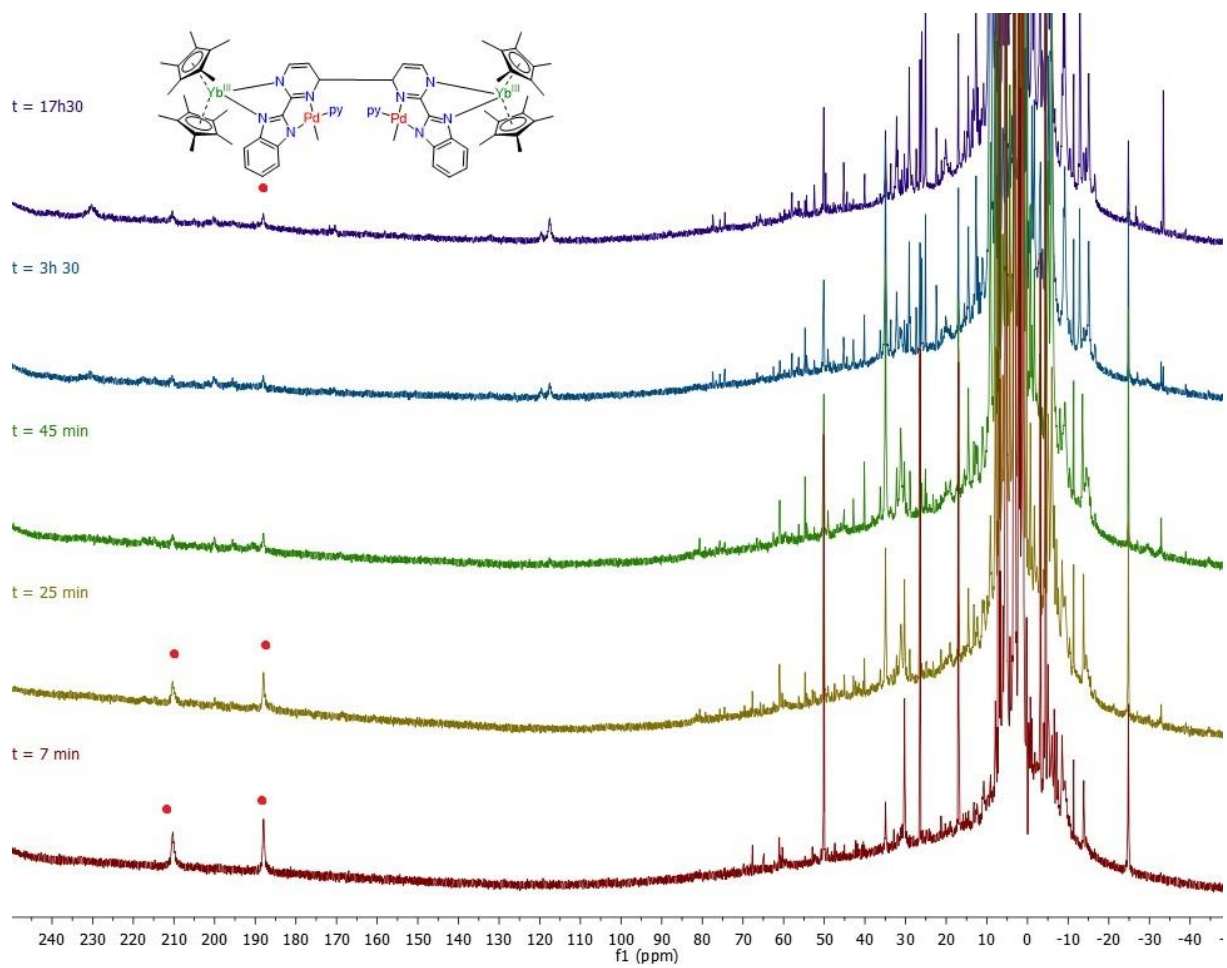

**Figure S25.** In situ formation of **5** using **two equivalents** of  $\text{Cp}^*_2\text{YbOEt}_2$  added to **1** in  $\text{tol-}d_8$  at 293 K over different periods of time.

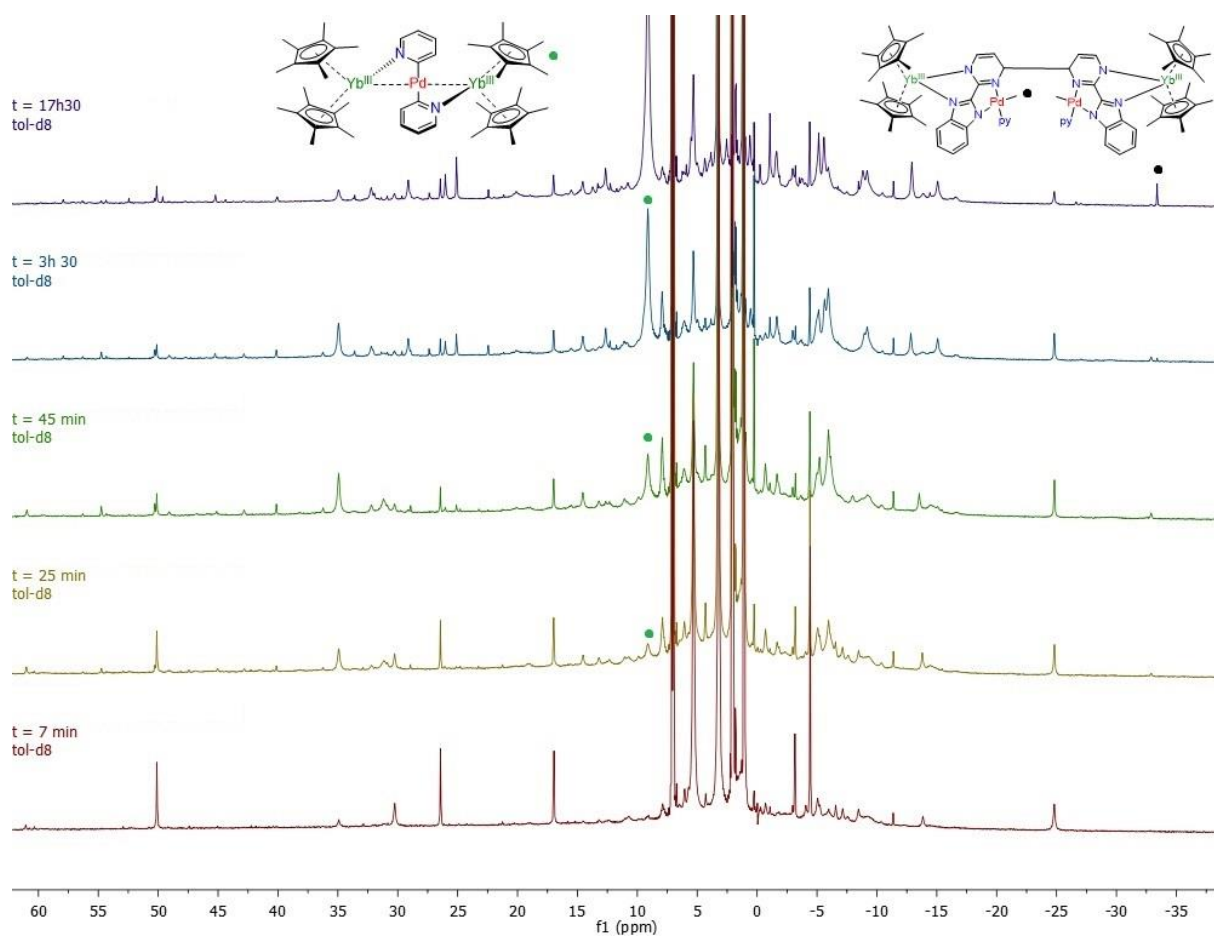

**Figure S26.** In situ formation of **5** using **two equivalents** of  $\text{Cp}^*_2\text{YbOEt}_2$  added to **1** in  $\text{tol-d}_8$  at 293 K over different periods of time. Zoom in the -35 to +60 ppm range.

## 5. Compound 6

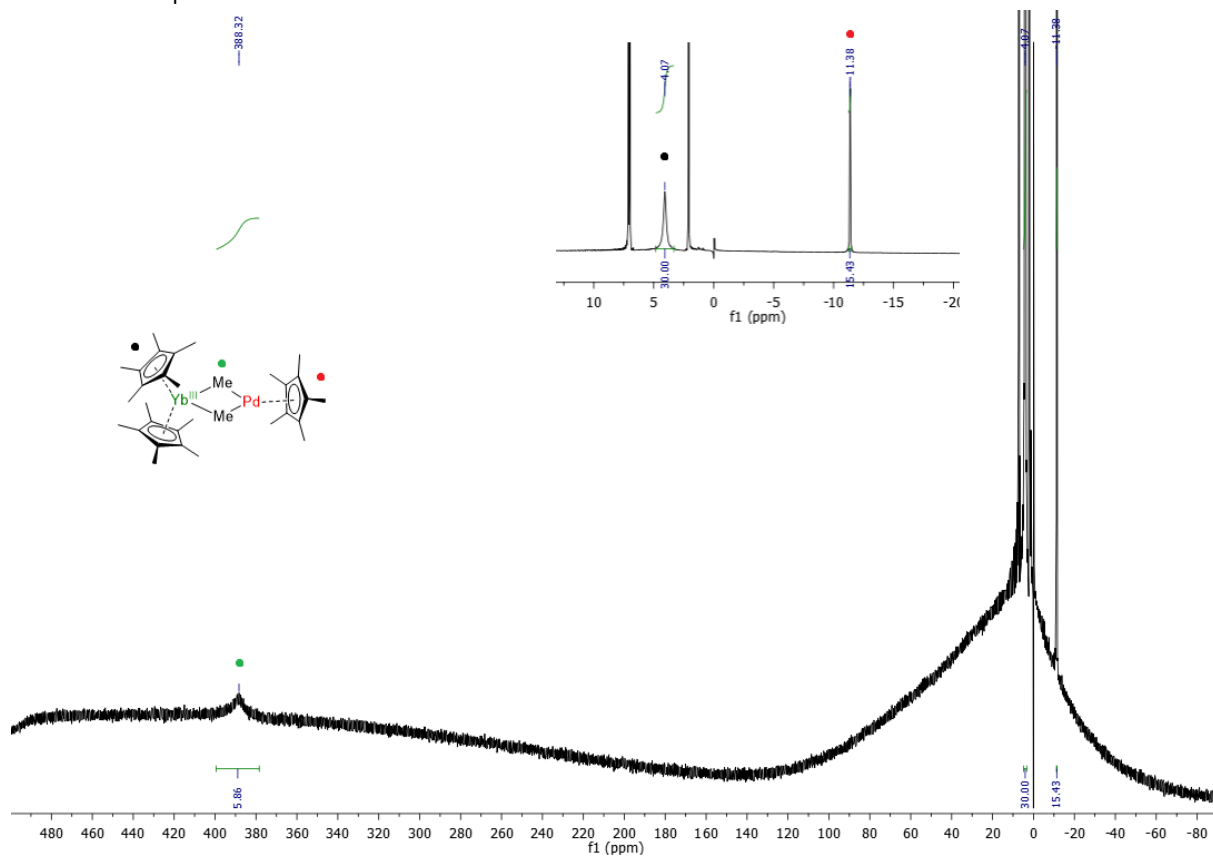

Figure S27.  $^1\text{H}$  NMR of complex 6 in  $\text{tol-}d_8$  at 293 K.

### III. Magnetism

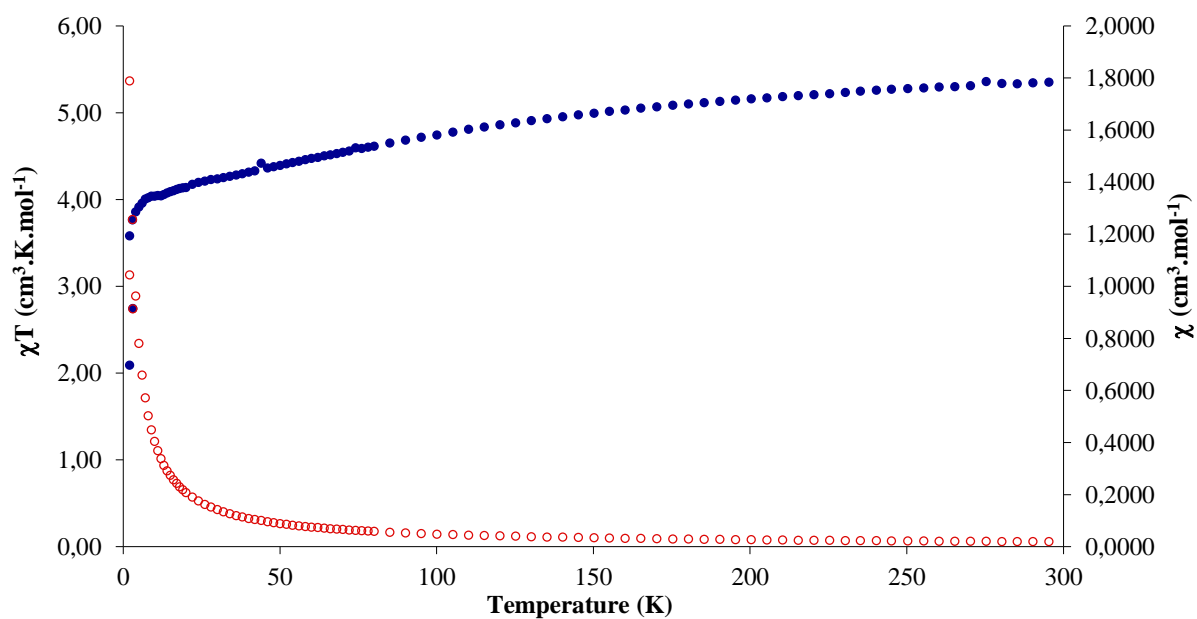

Figure S28. Temperature-dependent magnetic data for 5.  $\chi$  vs  $T$  is given as unfilled red dots,  $\chi T$  vs.  $T$  as filled blue dots.

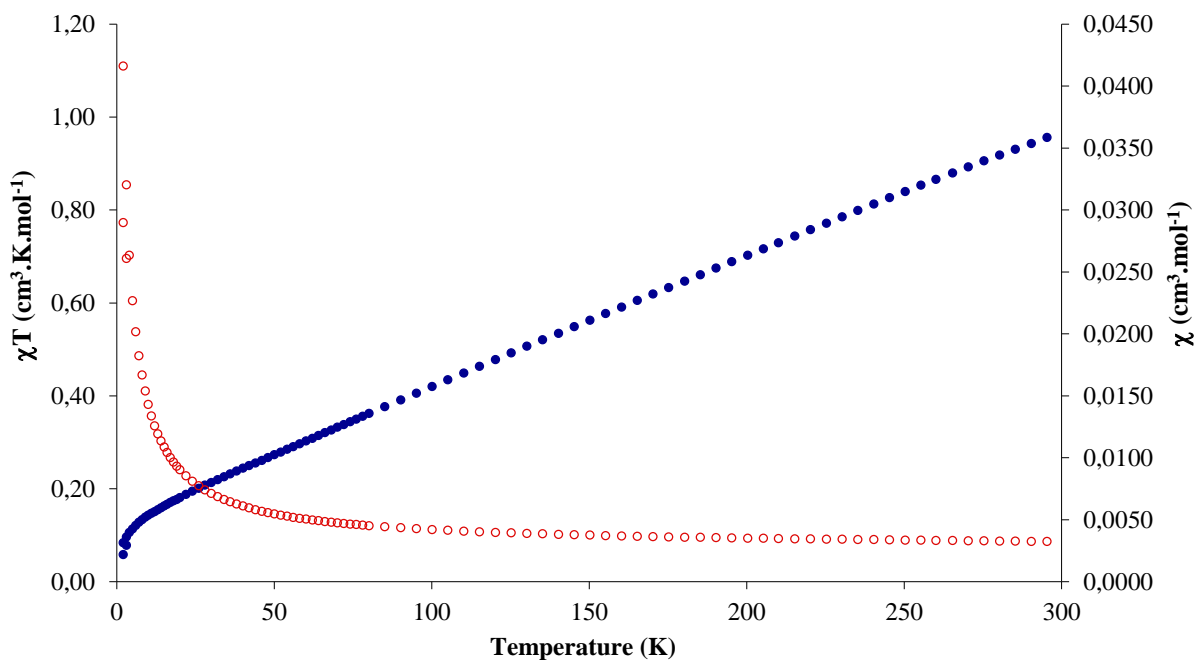

Figure S29. Temperature-dependent magnetic data for 4.  $\chi$  vs  $T$  is given as unfilled red dots,  $\chi T$  vs.  $T$  as filled blue dots.

## IV. Crystallographic data

Single crystals were mounted on a Kapton loop using Paratone N oil. An APEX III CCD BRUKER detector and a graphite Mo-K $\alpha$  monochromator were used for the data acquisition. All measurements were done at 150 K and a refinement method was used for solving the structures. The structure resolution was accomplished using the SHELXS-97 and SHELXT<sup>5</sup> programs, and the refinement was done with the SHELXL program.<sup>6,7</sup> The structure solutions and the refinements were achieved using the Olex2 software.<sup>8</sup> Pictures of the molecular structures in the solid state were obtained using the MERCURY software.<sup>9</sup> During the refinement steps, all atoms except hydrogens were refined anisotropically. The hydrogen atoms were placed on calculated positions, riding on the parent atom, unless otherwise stated. Finally, in order to obtain a complete refinement, a weighting step followed by multiple loops of refinement was done.

Specific comments for each data set are given below. Summary of the crystal data, data collection and refinement for the different complexes is given in Tables S1. Crystallographic data for the structures reported in this paper have been deposited with the Cambridge Crystallographic Data Centre (CCDC #2215195-2215200).

The following special comments apply to the models of the structures:

- Complex **2** crystallizes with 3 disordered molecules of toluene in the asymmetric unit. The four Cp\* rings are disordered over two positions with freely refined occupancy ratios. For the disordered fragments, similarity restraints on the displacement parameters (SIMU) and/or rigid body restraints (RIGU) were applied on the corresponding atoms. An alert B (11 missing FCF reflections below Theta(Min)) is arising in the CheckCif and might originate from low angle reflections that are missing due to the beamstop as the unit cell is reasonably large.
- Complex **3** crystallizes with 6 molecules of THF in the asymmetric unit. Two of them could be satisfactorily modelled using similarity restraints on the corresponding bond distances (SADI) and displacement parameters (SIMU). The four other are disordered over multiple positions and were removed from the electron density map using the Olex2 solvent mask command: 340 electrons were found in a volume of 864 Å<sup>3</sup> in 1 void per unit cell. This is consistent with the presence of 4 [C<sub>4</sub>H<sub>8</sub>O] per asymmetric unit which account for 320 electrons per unit cell. Two Alerts B are arising ( $R_{int}$  value of 0.195 > 0.18 and low C-C bond precision) which is due to the needle shape of the crystal and its very small dimensions resulting in very weak diffraction at high theta angles.
- The asymmetric unit of **4**·(2 C<sub>7</sub>H<sub>8</sub>) contains half a molecule of **4** and one molecule of toluene.
- The asymmetric unit of **5**·(2 C<sub>7</sub>H<sub>8</sub>) contains half a molecule of **5** and one molecule of toluene. An Alert A concerning a residual density peak of 3.65 e.Å<sup>-3</sup> at 0.77 Å from the heavy Yb centre is present and may result from suboptimal absorption correction and Fourier truncation error.
- In the molecular structure of **6**, the Pd(CH<sub>3</sub>)<sub>2</sub> protons have been located in the difference Fourier map and treated as riding on the corresponding parent carbon atoms.

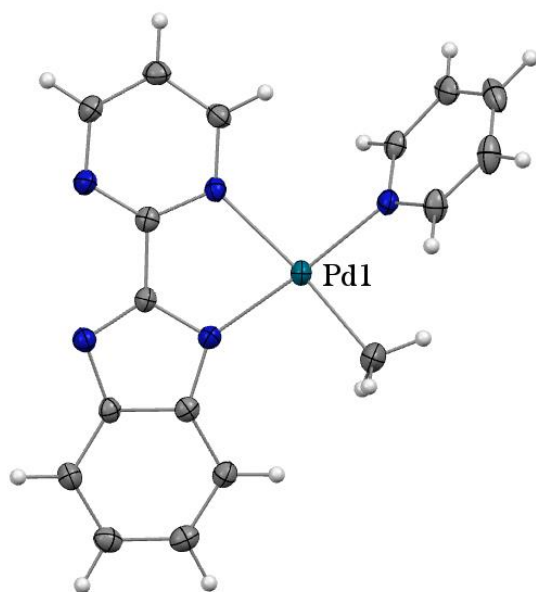

*Figure S30. ORTEP of 1 with 50% probability ellipsoids.*



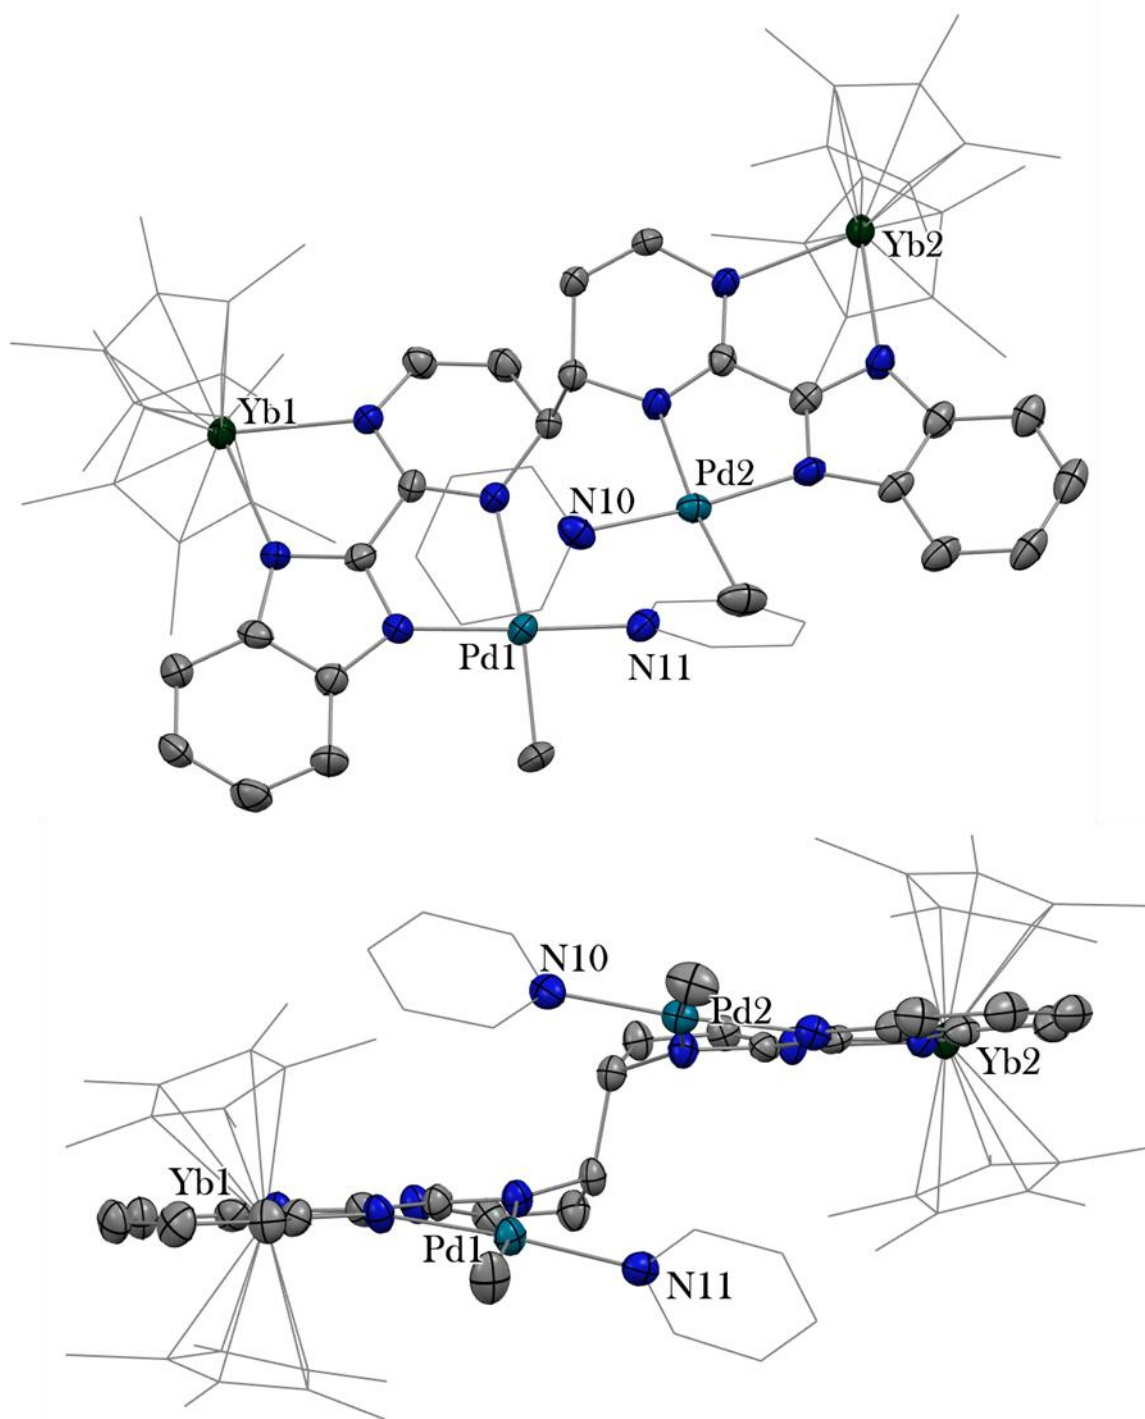

**Figure S31.** ORTEP of **2** (view from top, above; side view, below) with 50% probability ellipsoids (hydrogen atoms have been removed for clarity). The Cp\* and pyridine moieties are shown in wireframe to avoid clutter.

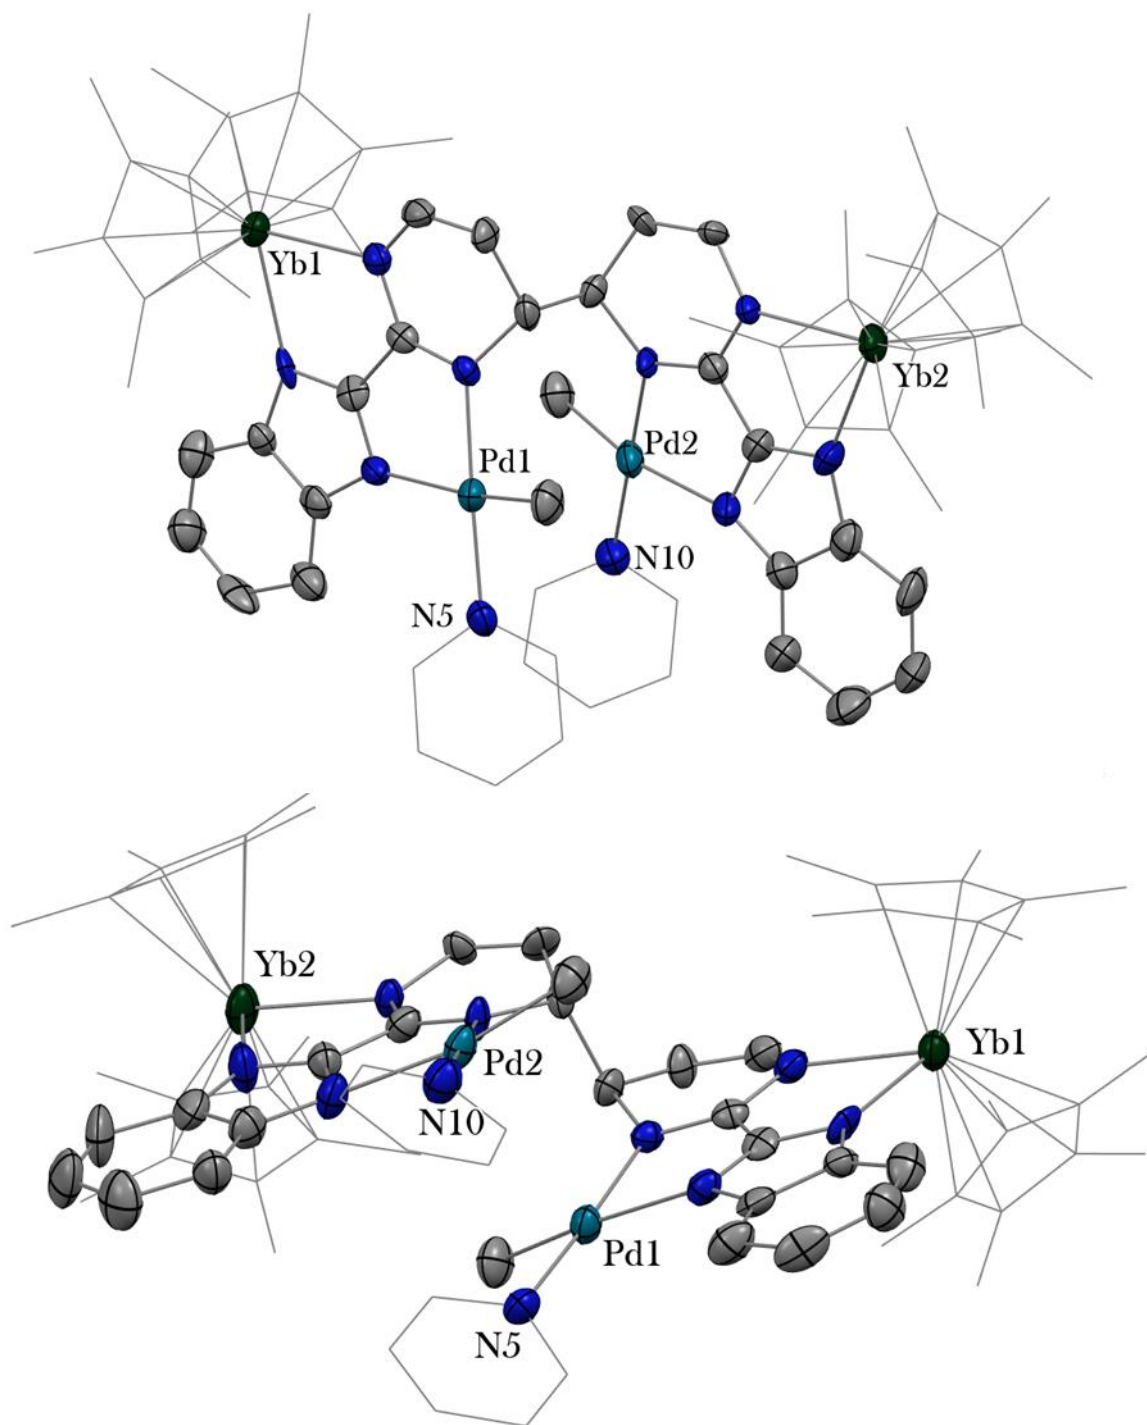

**Figure S32.** ORTEP of **3** (view from top, above; side view, below) with 50% probability ellipsoids (hydrogen atoms have been removed for clarity). The Cp\* and pyridine moieties are shown in wireframe to avoid clutter.

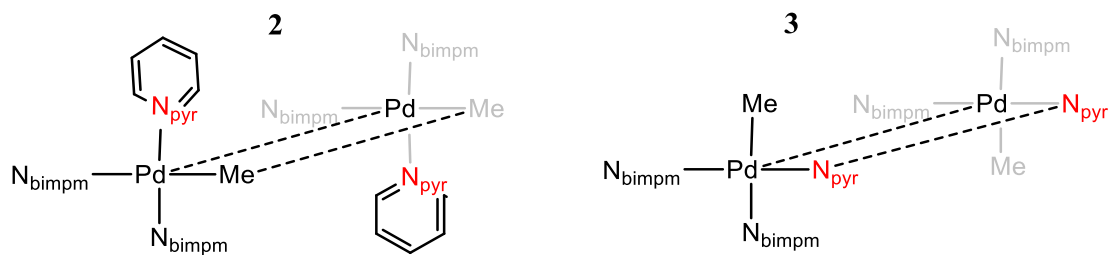

**Figure S33.** Schematic representation of the relative orientations of the ligands in the two planes of the Pd coordination sphere in compounds **2** and **3**.

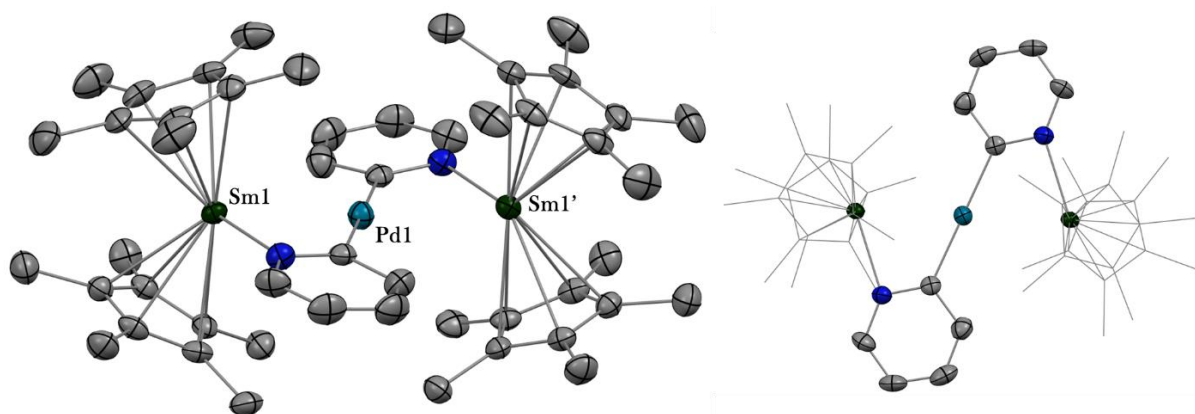

**Figure S34.** ORTEP of **4** with 50% probability ellipsoids (hydrogen atoms have been removed for clarity). Atoms with the prime character in the atom labels (') are at equivalent position (1-x, y, 3/2-z).

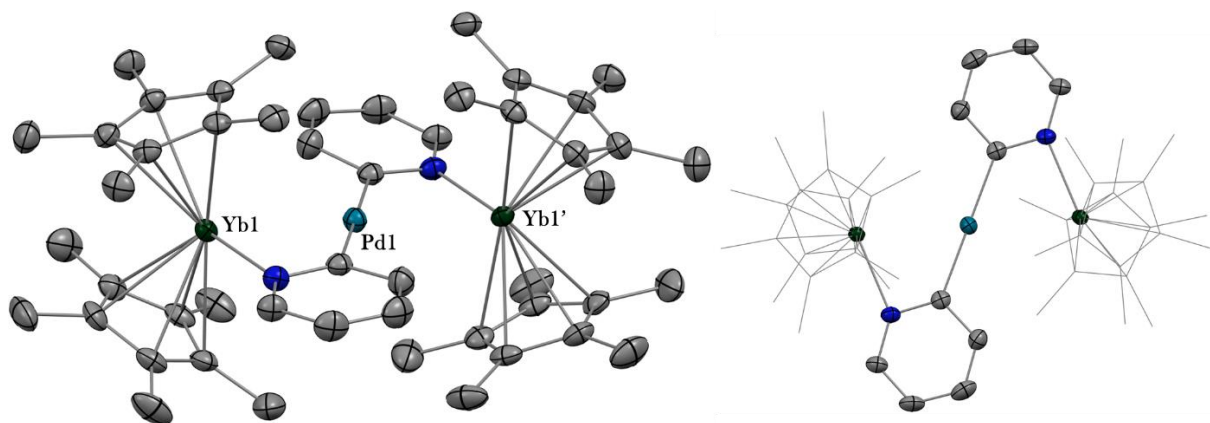

**Figure S35.** ORTEP of **5** with 50% probability ellipsoids (hydrogen atoms have been removed for clarity). Atoms with the prime character in the atom labels (') are at equivalent position (1-x, y, 3/2-z).

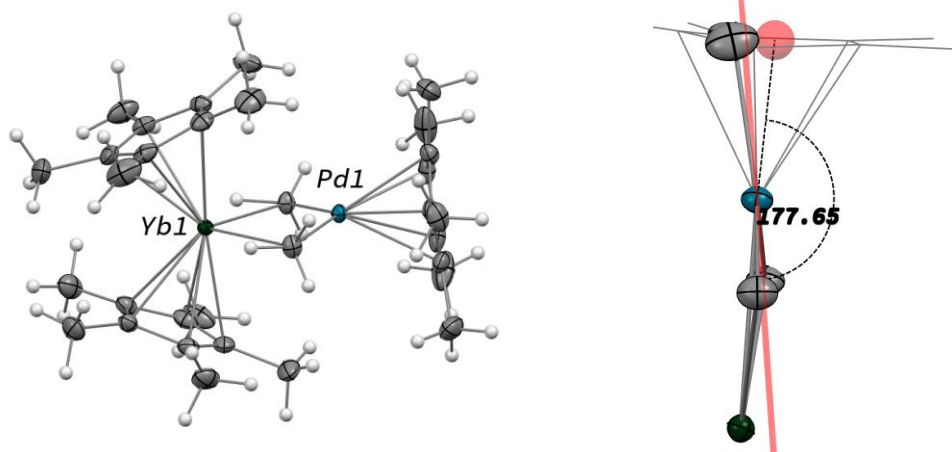

*Figure S36. ORTEP of 6 with 50% probability ellipsoids.*

**Table S1.** Crystallographic data for compounds 1-6.

| Compound                                    | 1                                                                | 2·(3 C <sub>7</sub> H <sub>8</sub> )                                             | 3·(4 C <sub>4</sub> H <sub>8</sub> O)                                                           | 4·(2 C <sub>7</sub> H <sub>8</sub> )                             | 5·(2 C <sub>7</sub> H <sub>8</sub> )                             | 6                                                                 |
|---------------------------------------------|------------------------------------------------------------------|----------------------------------------------------------------------------------|-------------------------------------------------------------------------------------------------|------------------------------------------------------------------|------------------------------------------------------------------|-------------------------------------------------------------------|
| Empirical formula                           | C <sub>17</sub> H <sub>15</sub> N <sub>5</sub> Pd                | C <sub>95</sub> H <sub>114</sub> N <sub>10</sub> Pd <sub>2</sub> Yb <sub>2</sub> | C <sub>98</sub> H <sub>138</sub> N <sub>10</sub> O <sub>6</sub> Pd <sub>2</sub> Yb <sub>2</sub> | C <sub>64</sub> H <sub>84</sub> N <sub>2</sub> PdSm <sub>2</sub> | C <sub>64</sub> H <sub>84</sub> N <sub>2</sub> PdYb <sub>2</sub> | C <sub>32</sub> H <sub>51</sub> PdYb                              |
| Formula weight                              | 395.74                                                           | 1954.84                                                                          | 2111.06                                                                                         | 1288.43                                                          | 1333.81                                                          | 715.16                                                            |
| Temperature/K                               | 150.15                                                           | 149.99                                                                           | 149.99                                                                                          | 150.0                                                            | 150.0                                                            | 150.0                                                             |
| Crystal system                              | monoclinic                                                       | monoclinic                                                                       | triclinic                                                                                       | monoclinic                                                       | monoclinic                                                       | monoclinic                                                        |
| Space group                                 | P2 <sub>1</sub> /c                                               | P2 <sub>1</sub> /n                                                               | P-1                                                                                             | C2/c                                                             | C2/c                                                             | P2 <sub>1</sub> /n                                                |
| a/Å                                         | 10.4114(14)                                                      | 14.7945(4)                                                                       | 14.758(4)                                                                                       | 15.7006(11)                                                      | 15.7166(4)                                                       | 8.5080(9)                                                         |
| b/Å                                         | 8.5418(11)                                                       | 34.6792(12)                                                                      | 17.469(5)                                                                                       | 13.8198(8)                                                       | 13.6208(3)                                                       | 16.1094(16)                                                       |
| c/Å                                         | 17.017(2)                                                        | 17.8510(5)                                                                       | 20.212(6)                                                                                       | 26.6978(17)                                                      | 26.5397(6)                                                       | 21.445(2)                                                         |
| α/°                                         | 90                                                               | 90                                                                               | 101.902(7)                                                                                      | 90                                                               | 90                                                               | 90                                                                |
| β/°                                         | 92.924(4)                                                        | 111.427(2)                                                                       | 102.431(7)                                                                                      | 91.602(3)                                                        | 91.6370(10)                                                      | 91.493(2)                                                         |
| γ/°                                         | 90                                                               | 90                                                                               | 113.691(7)                                                                                      | 90                                                               | 90                                                               | 90                                                                |
| Volume/Å <sup>3</sup>                       | 1511.4(3)                                                        | 8525.6(5)                                                                        | 4403(2)                                                                                         | 5790.6(6)                                                        | 5679.1(2)                                                        | 2938.2(5)                                                         |
| Z                                           | 4                                                                | 4                                                                                | 2                                                                                               | 4                                                                | 4                                                                | 4                                                                 |
| ρ <sub>calc</sub> /g.cm <sup>-3</sup>       | 1.739                                                            | 1.523                                                                            | 1.592                                                                                           | 1.478                                                            | 1.560                                                            | 1.617                                                             |
| μ/mm <sup>-1</sup>                          | 1.234                                                            | 2.640                                                                            | 2.568                                                                                           | 2.348                                                            | 3.619                                                            | 3.793                                                             |
| F(000)                                      | 792.0                                                            | 3944.0                                                                           | 2152.0                                                                                          | 2608.0                                                           | 2672.0                                                           | 1436.0                                                            |
| Crystal size/mm <sup>3</sup>                | 0.16 × 0.08 × 0.02                                               | 0.34 × 0.28 × 0.06                                                               | 0.28 × 0.04 × 0.02                                                                              | 0.12 × 0.08 × 0.04                                               | 0.12 × 0.04 × 0.04                                               | 0.60 × 0.32 × 0.28                                                |
| Radiation                                   | MoKα (λ = 0.71069)                                               | MoKα (λ = 0.71073)                                                               | MoKα (λ = 0.71073)                                                                              | MoKα (λ = 0.71069)                                               | MoKα (λ = 0.71069)                                               | MoKα (λ = 0.71073)                                                |
| 2θ range for data collection/°              | 6.036 to 55.242                                                  | 4.63 to 57.4                                                                     | 2.694 to 50.138                                                                                 | 4.93 to 52.738                                                   | 4.964 to 55.002                                                  | 5.106 to 68.674                                                   |
| Index ranges                                | -13 ≤ h ≤ 13,<br>-11 ≤ k ≤ 11,<br>-21 ≤ l ≤ 22                   | -18 ≤ h ≤ 19,<br>-38 ≤ k ≤ 46,<br>-24 ≤ l ≤ 22                                   | -17 ≤ h ≤ 17,<br>-20 ≤ k ≤ 20,<br>-24 ≤ l ≤ 24                                                  | -19 ≤ h ≤ 19,<br>-17 ≤ k ≤ 17,<br>-33 ≤ l ≤ 33                   | -20 ≤ h ≤ 18,<br>-17 ≤ k ≤ 17,<br>-34 ≤ l ≤ 26                   | -13 ≤ h ≤ 13,<br>-25 ≤ k ≤ 25,<br>-34 ≤ l ≤ 34                    |
| Reflections collected                       | 37495                                                            | 100236                                                                           | 96195                                                                                           | 46629                                                            | 21838                                                            | 117934                                                            |
| Independent reflections                     | 3490 [R <sub>int</sub> = 0.0749,<br>R <sub>sigma</sub> = 0.0372] | 21851 [R <sub>int</sub> = 0.0964,<br>R <sub>sigma</sub> = 0.0795]                | 15419 [R <sub>int</sub> = 0.1951,<br>R <sub>sigma</sub> = 0.1656]                               | 5915 [R <sub>int</sub> = 0.1212,<br>R <sub>sigma</sub> = 0.0864] | 6389 [R <sub>int</sub> = 0.0340,<br>R <sub>sigma</sub> = 0.0316] | 12295 [R <sub>int</sub> = 0.0586,<br>R <sub>sigma</sub> = 0.0286] |
| Data/restraints/parameters                  | 3490/0/209                                                       | 21851/1848/1290                                                                  | 15419/61/905                                                                                    | 5915/0/323                                                       | 6389/0/323                                                       | 12295/0/340                                                       |
| Goodness-of-fit on F <sup>2</sup>           | 1.026                                                            | 1.020                                                                            | 0.999                                                                                           | 0.891                                                            | 1.076                                                            | 1.106                                                             |
| Final R indexes [I ≥ 2σ (I)]                | R <sub>1</sub> = 0.0274, wR <sub>2</sub> =<br>0.0621             | R <sub>1</sub> = 0.0515, wR <sub>2</sub> =<br>0.1148                             | R <sub>1</sub> = 0.0674, wR <sub>2</sub> =<br>0.1502                                            | R <sub>1</sub> = 0.0378, wR <sub>2</sub> =<br>0.0685             | R <sub>1</sub> = 0.0294, wR <sub>2</sub> =<br>0.0709             | R <sub>1</sub> = 0.0275, wR <sub>2</sub> =<br>0.0588              |
| Final R indexes [all data]                  | R <sub>1</sub> = 0.0451, wR <sub>2</sub> =<br>0.0682             | R <sub>1</sub> = 0.0902, wR <sub>2</sub> =<br>0.1371                             | R <sub>1</sub> = 0.1530, wR <sub>2</sub> =<br>0.1898                                            | R <sub>1</sub> = 0.0594, wR <sub>2</sub> =<br>0.0739             | R <sub>1</sub> = 0.0324, wR <sub>2</sub> =<br>0.0725             | R <sub>1</sub> = 0.0386, wR <sub>2</sub> =<br>0.0645              |
| Largest diff. peak/hole / e Å <sup>-3</sup> | 0.39/-0.59                                                       | 1.65/-1.64                                                                       | 2.94/-1.17                                                                                      | 1.13/-1.28                                                       | 2.88/-0.96                                                       | 1.50/-1.96                                                        |

**Table S2.** Bond Lengths for 1.

| Atom | Atom | Length/Å | Atom | Atom | Length/Å |
|------|------|----------|------|------|----------|
| Pd1  | N1   | 2.176(2) | C1   | C2   | 1.460(4) |
| Pd1  | N2   | 2.035(2) | C3   | C4   | 1.402(4) |
| Pd1  | N5   | 2.041(2) | C3   | C8   | 1.420(3) |
| Pd1  | C17  | 2.021(3) | C4   | C5   | 1.380(4) |
| N1   | C1   | 1.354(3) | C5   | C6   | 1.405(4) |
| N1   | C9   | 1.340(3) | C6   | C7   | 1.378(4) |
| N2   | C2   | 1.367(3) | C7   | C8   | 1.403(3) |
| N2   | C3   | 1.374(3) | C9   | C10  | 1.376(4) |
| N3   | C1   | 1.330(3) | C10  | C11  | 1.380(4) |
| N3   | C11  | 1.335(3) | C12  | C13  | 1.378(4) |
| N4   | C2   | 1.331(3) | C13  | C14  | 1.384(4) |
| N4   | C8   | 1.377(3) | C14  | C15  | 1.374(4) |
| N5   | C12  | 1.347(3) | C15  | C16  | 1.371(4) |
| N5   | C16  | 1.349(3) |      |      |          |

**Table S3.** Bond Angles for 1.

| Atom | Atom | Atom | Angle/°    | Atom | Atom | Atom | Angle/°  |
|------|------|------|------------|------|------|------|----------|
| N2   | Pd1  | N1   | 79.38(8)   | N4   | C2   | N2   | 116.4(2) |
| N2   | Pd1  | N5   | 174.97(8)  | N4   | C2   | C1   | 124.4(2) |
| N5   | Pd1  | N1   | 96.40(8)   | N2   | C3   | C4   | 132.7(2) |
| C17  | Pd1  | N1   | 174.62(10) | N2   | C3   | C8   | 107.2(2) |
| C17  | Pd1  | N2   | 95.34(11)  | C4   | C3   | C8   | 120.0(2) |
| C17  | Pd1  | N5   | 88.83(11)  | C5   | C4   | C3   | 117.7(2) |
| C1   | N1   | Pd1  | 112.15(17) | C4   | C5   | C6   | 122.3(3) |
| C9   | N1   | Pd1  | 131.46(18) | C7   | C6   | C5   | 120.8(3) |
| C9   | N1   | C1   | 116.4(2)   | C6   | C7   | C8   | 117.9(2) |
| C2   | N2   | Pd1  | 113.94(17) | N4   | C8   | C3   | 109.8(2) |
| C2   | N2   | C3   | 103.7(2)   | N4   | C8   | C7   | 129.0(2) |
| C3   | N2   | Pd1  | 142.31(17) | C7   | C8   | C3   | 121.1(2) |
| C1   | N3   | C11  | 116.3(2)   | N1   | C9   | C10  | 121.9(2) |
| C2   | N4   | C8   | 102.9(2)   | C9   | C10  | C11  | 117.1(3) |
| C12  | N5   | Pd1  | 121.31(18) | N3   | C11  | C10  | 122.6(3) |
| C12  | N5   | C16  | 117.4(2)   | N5   | C12  | C13  | 122.8(3) |
| C16  | N5   | Pd1  | 120.92(19) | C12  | C13  | C14  | 118.7(3) |
| N1   | C1   | C2   | 114.9(2)   | C15  | C14  | C13  | 118.9(3) |
| N3   | C1   | N1   | 125.7(2)   | C16  | C15  | C14  | 119.4(3) |
| N3   | C1   | C2   | 119.4(2)   | N5   | C16  | C15  | 122.7(3) |
| N2   | C2   | C1   | 119.0(2)   |      |      |      |          |

*Table S4. Bond Lengths for 2.*

| <b>Atom</b> | <b>Atom</b> | <b>Length/Å</b> | <b>Atom</b> | <b>Atom</b> | <b>Length/Å</b> |
|-------------|-------------|-----------------|-------------|-------------|-----------------|
| Yb1         | N4          | 2.317(5)        | C40         | C41         | 1.485(7)        |
| Yb1         | N12         | 2.353(5)        | C42         | C43         | 1.402(8)        |
| Yb1         | C13         | 3.090(6)        | C42         | C47         | 1.400(9)        |
| Yb1         | C14         | 3.146(5)        | C43         | C44         | 1.379(9)        |
| Yb1         | C70         | 2.636(5)        | C44         | C45         | 1.393(11)       |
| Yb1         | C69         | 2.657(5)        | C45         | C46         | 1.373(9)        |
| Yb1         | C68         | 2.648(5)        | C46         | C47         | 1.411(9)        |
| Yb1         | C67         | 2.621(5)        | C48         | C49         | 1.387(9)        |
| Yb1         | C66         | 2.614(5)        | C49         | C50         | 1.385(11)       |
| Yb1         | C74         | 2.617(7)        | C50         | C51         | 1.386(12)       |
| Yb1         | C75         | 2.609(6)        | C51         | C52         | 1.383(10)       |
| Yb1         | C76         | 2.669(6)        | C54         | C55         | 1.369(10)       |
| Yb1         | C77         | 2.716(7)        | C55         | C56         | 1.383(11)       |
| Yb1         | C79         | 2.684(8)        | C56         | C57         | 1.383(11)       |
| Yb1         | C79A        | 2.723(8)        | C57         | C58         | 1.365(9)        |
| Yb1         | C74A        | 2.703(9)        | C60         | C61         | 1.403(9)        |
| Yb1         | C75A        | 2.668(8)        | C60         | C65         | 1.407(8)        |
| Yb1         | C76A        | 2.666(7)        | C61         | C62         | 1.380(9)        |
| Yb1         | C77A        | 2.701(7)        | C62         | C63         | 1.401(10)       |
| Yb1         | C66A        | 2.673(10)       | C63         | C64         | 1.372(9)        |
| Yb1         | C70A        | 2.701(9)        | C64         | C65         | 1.401(9)        |
| Yb1         | C69A        | 2.716(9)        | C70         | C69         | 1.413(3)        |
| Yb1         | C68A        | 2.697(10)       | C70         | C66         | 1.413(3)        |
| Yb1         | C67A        | 2.671(10)       | C70         | C71         | 1.503(3)        |
| Yb2         | N6          | 2.318(5)        | C69         | C68         | 1.414(3)        |
| Yb2         | N7          | 2.324(5)        | C69         | C1          | 1.503(3)        |
| Yb2         | C25         | 2.643(9)        | C68         | C67         | 1.413(3)        |
| Yb2         | C27         | 2.628(10)       | C68         | C72         | 1.501(3)        |
| Yb2         | C20         | 2.655(10)       | C67         | C66         | 1.414(3)        |
| Yb2         | C21         | 2.687(9)        | C67         | C2          | 1.502(3)        |
| Yb2         | C23         | 2.679(8)        | C66         | C73         | 1.502(3)        |
| Yb2         | C35         | 2.755(6)        | C74         | C75         | 1.418(3)        |
| Yb2         | C37         | 2.684(6)        | C74         | C79         | 1.418(3)        |
| Yb2         | C30         | 2.627(6)        | C74         | C83         | 1.507(4)        |
| Yb2         | C32         | 2.665(6)        | C75         | C76         | 1.418(3)        |
| Yb2         | C33         | 2.743(6)        | C75         | C82         | 1.507(4)        |
| Yb2         | C40         | 3.091(6)        | C76         | C77         | 1.418(3)        |
| Yb2         | C41         | 3.148(6)        | C76         | C81         | 1.506(4)        |
| Yb2         | C32A        | 2.619(8)        | C77         | C79         | 1.417(3)        |
| Yb2         | C33A        | 2.606(9)        | C77         | C78         | 1.508(4)        |
| Yb2         | C35A        | 2.609(9)        | C79         | C80         | 1.506(4)        |
| Yb2         | C37A        | 2.624(8)        | C87         | C89         | 1.3900          |
| Yb2         | C30A        | 2.630(8)        | C87         | C86         | 1.3900          |
| Yb2         | C25A        | 2.689(7)        | C87         | C88         | 1.37(3)         |
| Yb2         | C27A        | 2.647(8)        | C89         | C90         | 1.3900          |
| Yb2         | C20A        | 2.627(9)        | C90         | C84         | 1.3900          |
| Yb2         | C21A        | 2.657(8)        | C84         | C85         | 1.3900          |
| Yb2         | C23A        | 2.695(7)        | C85         | C86         | 1.3900          |
| Pd1         | N2          | 2.035(5)        | C32A        | C33A        | 1.409(4)        |
| Pd1         | N3          | 2.151(5)        | C32A        | C30A        | 1.409(4)        |

| Atom | Atom | Length/Å  | Atom | Atom | Length/Å  |
|------|------|-----------|------|------|-----------|
| Pd1  | N11  | 2.027(5)  | C32A | C39A | 1.498(5)  |
| Pd1  | C59  | 2.032(6)  | C33A | C35A | 1.409(4)  |
| Pd2  | N8   | 2.175(5)  | C33A | C34A | 1.498(5)  |
| Pd2  | N9   | 2.030(5)  | C35A | C37A | 1.408(4)  |
| Pd2  | N10  | 2.026(5)  | C35A | C36A | 1.499(5)  |
| Pd2  | C53  | 2.022(6)  | C37A | C30A | 1.409(4)  |
| N2   | C13  | 1.338(7)  | C37A | C38A | 1.497(5)  |
| N2   | C60  | 1.376(8)  | C30A | C31A | 1.497(5)  |
| N3   | C14  | 1.316(7)  | C25A | C27A | 1.418(4)  |
| N3   | C16  | 1.467(7)  | C25A | C23A | 1.419(4)  |
| N4   | C5   | 1.395(8)  | C25A | C26A | 1.506(4)  |
| N4   | C14  | 1.346(7)  | C27A | C20A | 1.418(4)  |
| C5   | C15  | 1.330(8)  | C27A | C28A | 1.507(4)  |
| N6   | C19  | 1.390(7)  | C20A | C21A | 1.418(4)  |
| N6   | C41  | 1.343(7)  | C20A | C29A | 1.507(4)  |
| N7   | C40  | 1.348(8)  | C21A | C23A | 1.417(4)  |
| N7   | C47  | 1.390(7)  | C21A | C22A | 1.507(4)  |
| N8   | C17  | 1.489(7)  | C23A | C24A | 1.507(4)  |
| N8   | C41  | 1.299(8)  | C79A | C74A | 1.408(4)  |
| N9   | C40  | 1.324(7)  | C79A | C77A | 1.408(4)  |
| N9   | C42  | 1.394(7)  | C79A | C80A | 1.497(4)  |
| N10  | C48  | 1.355(8)  | C74A | C75A | 1.408(4)  |
| N10  | C52  | 1.337(8)  | C74A | C83A | 1.497(4)  |
| N11  | C54  | 1.343(9)  | C75A | C76A | 1.408(4)  |
| N11  | C58  | 1.353(8)  | C75A | C82A | 1.498(4)  |
| N12  | C13  | 1.342(7)  | C76A | C77A | 1.409(4)  |
| N12  | C65  | 1.385(8)  | C76A | C81A | 1.497(4)  |
| C6   | C7   | 1.369(15) | C77A | C78A | 1.496(4)  |
| C6   | C11  | 1.384(15) | C66A | C70A | 1.402(5)  |
| C7   | C8   | 1.368(15) | C66A | C67A | 1.404(5)  |
| C8   | C9   | 1.383(15) | C66A | C73A | 1.493(6)  |
| C9   | C10  | 1.503(17) | C70A | C69A | 1.404(5)  |
| C9   | C12  | 1.386(15) | C70A | C71A | 1.492(6)  |
| C11  | C12  | 1.338(15) | C69A | C68A | 1.403(5)  |
| C13  | C14  | 1.465(9)  | C69A | C1A  | 1.491(6)  |
| C15  | C16  | 1.506(8)  | C68A | C67A | 1.404(5)  |
| C16  | C17  | 1.583(9)  | C68A | C72A | 1.493(6)  |
| C17  | C18  | 1.494(8)  | C67A | C2A  | 1.492(6)  |
| C18  | C19  | 1.341(8)  | C3   | C4   | 1.369(11) |
| C25  | C27  | 1.416(4)  | C3   | C94  | 1.368(11) |
| C25  | C23  | 1.416(4)  | C4   | C91  | 1.368(11) |
| C25  | C26  | 1.507(5)  | C91  | C92  | 1.368(11) |
| C27  | C20  | 1.416(4)  | C92  | C93  | 1.368(11) |
| C27  | C28  | 1.506(5)  | C92  | C95  | 1.56(3)   |
| C20  | C21  | 1.418(4)  | C93  | C94  | 1.369(11) |
| C20  | C29  | 1.505(5)  | C92A | C91A | 1.3900    |
| C21  | C23  | 1.417(4)  | C92A | C93A | 1.3900    |
| C21  | C22  | 1.505(5)  | C92A | C95A | 1.36(3)   |
| C23  | C24  | 1.505(5)  | C91A | C4A  | 1.3900    |
| C35  | C37  | 1.414(3)  | C4A  | C3A  | 1.3900    |
| C35  | C33  | 1.414(3)  | C3A  | C94A | 1.3900    |
| C35  | C36  | 1.504(3)  | C94A | C93A | 1.3900    |



| Atom | Atom | Length/Å | Atom | Atom | Length/Å |
|------|------|----------|------|------|----------|
| C37  | C30  | 1.414(3) | C87A | C89A | 1.3900   |
| C37  | C38  | 1.503(3) | C87A | C86A | 1.3900   |
| C30  | C32  | 1.414(3) | C87A | C88A | 1.56(4)  |
| C30  | C31  | 1.504(3) | C89A | C90A | 1.3900   |
| C32  | C33  | 1.415(3) | C90A | C84A | 1.3900   |
| C32  | C39  | 1.503(3) | C84A | C85A | 1.3900   |
| C33  | C34  | 1.503(3) | C85A | C86A | 1.3900   |

Table S5. Bond Angles for 2.

| Atom | Atom | Atom | Angle/°    | Atom | Atom | Atom | Angle/°   |
|------|------|------|------------|------|------|------|-----------|
| N4   | Yb1  | N12  | 73.68(17)  | C16  | N3   | Pd1  | 132.5(3)  |
| N4   | Yb1  | C13  | 49.82(17)  | C5   | N4   | Yb1  | 129.7(4)  |
| N4   | Yb1  | C14  | 22.67(17)  | C14  | N4   | Yb1  | 115.8(4)  |
| N4   | Yb1  | C70  | 119.44(18) | C14  | N4   | C5   | 112.5(5)  |
| N4   | Yb1  | C69  | 132.84(17) | C15  | C5   | N4   | 123.7(6)  |
| N4   | Yb1  | C68  | 106.84(17) | C19  | N6   | Yb2  | 130.2(4)  |
| N4   | Yb1  | C67  | 81.52(17)  | C41  | N6   | Yb2  | 116.0(3)  |
| N4   | Yb1  | C66  | 88.68(17)  | C41  | N6   | C19  | 112.8(5)  |
| N4   | Yb1  | C74  | 85.08(18)  | C40  | N7   | Yb2  | 111.9(4)  |
| N4   | Yb1  | C75  | 113.53(19) | C40  | N7   | C47  | 101.8(5)  |
| N4   | Yb1  | C76  | 134.94(18) | C47  | N7   | Yb2  | 146.1(4)  |
| N4   | Yb1  | C77  | 114.86(18) | C17  | N8   | Pd2  | 132.0(4)  |
| N4   | Yb1  | C79  | 86.54(17)  | C41  | N8   | Pd2  | 111.1(4)  |
| N4   | Yb1  | C79A | 88.29(19)  | C41  | N8   | C17  | 116.9(5)  |
| N4   | Yb1  | C74A | 78.72(19)  | C40  | N9   | Pd2  | 112.2(4)  |
| N4   | Yb1  | C75A | 102.0(2)   | C40  | N9   | C42  | 103.7(5)  |
| N4   | Yb1  | C76A | 128.8(2)   | C42  | N9   | Pd2  | 143.1(4)  |
| N4   | Yb1  | C77A | 118.3(2)   | C48  | N10  | Pd2  | 117.5(4)  |
| N4   | Yb1  | C66A | 78.8(2)    | C52  | N10  | Pd2  | 124.0(5)  |
| N4   | Yb1  | C70A | 101.1(2)   | C52  | N10  | C48  | 118.5(6)  |
| N4   | Yb1  | C69A | 128.3(2)   | C54  | N11  | Pd1  | 118.9(4)  |
| N4   | Yb1  | C68A | 120.3(3)   | C54  | N11  | C58  | 118.4(6)  |
| N4   | Yb1  | C67A | 89.9(2)    | C58  | N11  | Pd1  | 122.7(5)  |
| N12  | Yb1  | C13  | 24.02(16)  | C13  | N12  | Yb1  | 110.5(4)  |
| N12  | Yb1  | C14  | 51.08(16)  | C13  | N12  | C65  | 103.3(5)  |
| N12  | Yb1  | C70  | 87.39(17)  | C65  | N12  | Yb1  | 145.7(4)  |
| N12  | Yb1  | C69  | 117.25(17) | C7   | C6   | C11  | 117.5(11) |
| N12  | Yb1  | C68  | 134.03(17) | C8   | C7   | C6   | 120.5(10) |
| N12  | Yb1  | C67  | 109.83(17) | C7   | C8   | C9   | 121.9(10) |
| N12  | Yb1  | C66  | 82.91(17)  | C8   | C9   | C10  | 121.9(12) |
| N12  | Yb1  | C74  | 90.65(18)  | C8   | C9   | C12  | 116.7(11) |
| N12  | Yb1  | C75  | 86.22(19)  | C12  | C9   | C10  | 121.4(12) |
| N12  | Yb1  | C76  | 112.79(19) | C12  | C11  | C6   | 122.2(11) |
| N12  | Yb1  | C77  | 136.87(19) | C11  | C12  | C9   | 121.2(10) |

| Atom | Atom | Atom | Angle/°    | Atom | Atom | Atom | Angle/°  |
|------|------|------|------------|------|------|------|----------|
| N12  | Yb1  | C79  | 120.47(18) | N2   | C13  | Yb1  | 160.2(4) |
| N12  | Yb1  | C79A | 118.78(19) | N2   | C13  | N12  | 115.6(6) |
| N12  | Yb1  | C74A | 88.71(19)  | N2   | C13  | C14  | 120.6(5) |
| N12  | Yb1  | C75A | 76.9(2)    | N12  | C13  | Yb1  | 45.5(3)  |
| N12  | Yb1  | C76A | 99.3(2)    | N12  | C13  | C14  | 123.7(5) |
| N12  | Yb1  | C77A | 126.7(2)   | C14  | C13  | Yb1  | 78.6(3)  |
| N12  | Yb1  | C66A | 90.0(2)    | N3   | C14  | Yb1  | 170.1(5) |
| N12  | Yb1  | C70A | 77.0(2)    | N3   | C14  | N4   | 129.0(6) |
| N12  | Yb1  | C69A | 97.8(2)    | N3   | C14  | C13  | 115.1(5) |
| N12  | Yb1  | C68A | 125.9(3)   | N4   | C14  | Yb1  | 41.6(3)  |
| N12  | Yb1  | C67A | 120.4(3)   | N4   | C14  | C13  | 115.8(5) |
| C13  | Yb1  | C14  | 27.15(16)  | C13  | C14  | Yb1  | 74.3(3)  |
| C70  | Yb1  | C13  | 101.96(17) | C5   | C15  | C16  | 119.5(6) |
| C70  | Yb1  | C14  | 113.74(17) | N3   | C16  | C15  | 109.3(5) |
| C70  | Yb1  | C69  | 30.97(8)   | N3   | C16  | C17  | 111.3(5) |
| C70  | Yb1  | C68  | 51.31(12)  | C15  | C16  | C17  | 111.1(5) |
| C70  | Yb1  | C76  | 105.55(18) | N8   | C17  | C16  | 111.2(4) |
| C70  | Yb1  | C77  | 117.65(18) | N8   | C17  | C18  | 108.8(5) |
| C70  | Yb1  | C79  | 147.57(17) | C18  | C17  | C16  | 112.0(5) |
| C69  | Yb1  | C13  | 132.82(17) | C19  | C18  | C17  | 119.9(5) |
| C69  | Yb1  | C14  | 138.80(16) | C18  | C19  | N6   | 123.2(5) |
| C69  | Yb1  | C76  | 85.77(18)  | C27  | C25  | Yb2  | 73.8(3)  |
| C69  | Yb1  | C77  | 88.57(18)  | C27  | C25  | C26  | 126.0    |
| C69  | Yb1  | C79  | 117.14(17) | C23  | C25  | Yb2  | 76.0(3)  |
| C68  | Yb1  | C13  | 134.83(16) | C23  | C25  | C27  | 108.1    |
| C68  | Yb1  | C14  | 122.15(16) | C23  | C25  | C26  | 126.0    |
| C68  | Yb1  | C69  | 30.91(8)   | C26  | C25  | Yb2  | 116.3(3) |
| C68  | Yb1  | C76  | 98.84(19)  | C25  | C27  | Yb2  | 75.0(3)  |
| C68  | Yb1  | C77  | 86.02(18)  | C25  | C27  | C20  | 108.0    |
| C68  | Yb1  | C79  | 105.27(17) | C25  | C27  | C28  | 126.0    |
| C67  | Yb1  | C13  | 104.23(16) | C20  | C27  | Yb2  | 75.5(3)  |
| C67  | Yb1  | C14  | 92.33(16)  | C20  | C27  | C28  | 126.0    |
| C67  | Yb1  | C70  | 51.58(12)  | C28  | C27  | Yb2  | 115.7(3) |
| C67  | Yb1  | C69  | 51.34(12)  | C27  | C20  | Yb2  | 73.4(3)  |
| C67  | Yb1  | C68  | 31.11(8)   | C27  | C20  | C21  | 108.0    |
| C67  | Yb1  | C76  | 129.95(18) | C27  | C20  | C29  | 126.0    |
| C67  | Yb1  | C77  | 113.23(18) | C21  | C20  | Yb2  | 75.9(3)  |
| C67  | Yb1  | C79  | 122.11(18) | C21  | C20  | C29  | 126.0    |
| C66  | Yb1  | C13  | 86.24(16)  | C29  | C20  | Yb2  | 116.8(3) |
| C66  | Yb1  | C14  | 87.62(16)  | C20  | C21  | Yb2  | 73.4(3)  |
| C66  | Yb1  | C70  | 31.23(8)   | C20  | C21  | C22  | 126.0    |
| C66  | Yb1  | C69  | 51.41(12)  | C23  | C21  | Yb2  | 74.4(3)  |
| C66  | Yb1  | C68  | 51.53(12)  | C23  | C21  | C20  | 107.9    |
| C66  | Yb1  | C67  | 31.33(8)   | C23  | C21  | C22  | 126.0    |

| Atom | Atom | Atom | Angle/°    | Atom | Atom | Atom | Angle/°    |
|------|------|------|------------|------|------|------|------------|
| C66  | Yb1  | C74  | 172.09(16) | C22  | C21  | Yb2  | 118.1(3)   |
| C66  | Yb1  | C76  | 135.63(17) | C25  | C23  | Yb2  | 73.2(3)    |
| C66  | Yb1  | C77  | 136.73(17) | C25  | C23  | C21  | 108.0      |
| C66  | Yb1  | C79  | 153.41(18) | C25  | C23  | C24  | 126.1      |
| C74  | Yb1  | C13  | 86.02(17)  | C21  | C23  | Yb2  | 75.0(3)    |
| C74  | Yb1  | C14  | 84.75(17)  | C21  | C23  | C24  | 125.9      |
| C74  | Yb1  | C70  | 153.52(18) | C24  | C23  | Yb2  | 117.8(3)   |
| C74  | Yb1  | C69  | 136.35(17) | C37  | C35  | Yb2  | 72.19(19)  |
| C74  | Yb1  | C68  | 135.25(17) | C37  | C35  | C36  | 126.0      |
| C74  | Yb1  | C67  | 151.02(18) | C33  | C35  | Yb2  | 74.66(18)  |
| C74  | Yb1  | C76  | 51.42(14)  | C33  | C35  | C37  | 108.1      |
| C74  | Yb1  | C77  | 50.91(15)  | C33  | C35  | C36  | 126.0      |
| C74  | Yb1  | C79  | 30.99(10)  | C36  | C35  | Yb2  | 119.05(19) |
| C75  | Yb1  | C13  | 94.46(18)  | C35  | C37  | Yb2  | 77.7(2)    |
| C75  | Yb1  | C14  | 105.84(18) | C35  | C37  | C30  | 108.0      |
| C75  | Yb1  | C70  | 122.08(18) | C35  | C37  | C38  | 126.0      |
| C75  | Yb1  | C69  | 112.91(18) | C30  | C37  | Yb2  | 72.3(2)    |
| C75  | Yb1  | C68  | 129.98(18) | C30  | C37  | C38  | 126.0      |
| C75  | Yb1  | C67  | 161.09(18) | C38  | C37  | Yb2  | 116.02(18) |
| C75  | Yb1  | C66  | 151.34(18) | C37  | C30  | Yb2  | 76.8(2)    |
| C75  | Yb1  | C74  | 31.48(9)   | C37  | C30  | C32  | 108.1      |
| C75  | Yb1  | C76  | 31.14(9)   | C37  | C30  | C31  | 126.0      |
| C75  | Yb1  | C77  | 50.99(14)  | C32  | C30  | Yb2  | 75.98(19)  |
| C75  | Yb1  | C79  | 51.34(15)  | C32  | C30  | C31  | 126.0      |
| C76  | Yb1  | C13  | 125.24(19) | C31  | C30  | Yb2  | 113.6(2)   |
| C76  | Yb1  | C14  | 135.18(18) | C30  | C32  | Yb2  | 73.03(19)  |
| C76  | Yb1  | C77  | 30.51(9)   | C30  | C32  | C33  | 107.9      |
| C76  | Yb1  | C79  | 50.74(14)  | C30  | C32  | C39  | 126.0      |
| C77  | Yb1  | C13  | 136.88(18) | C33  | C32  | Yb2  | 77.9(2)    |
| C77  | Yb1  | C14  | 128.01(17) | C33  | C32  | C39  | 126.0      |
| C79  | Yb1  | C13  | 110.01(17) | C39  | C32  | Yb2  | 115.21(19) |
| C79  | Yb1  | C14  | 97.58(17)  | C35  | C33  | Yb2  | 75.55(18)  |
| C79  | Yb1  | C77  | 30.43(9)   | C35  | C33  | C32  | 108.0      |
| C79A | Yb1  | C13  | 109.49(19) | C35  | C33  | C34  | 126.0      |
| C79A | Yb1  | C14  | 98.38(18)  | C32  | C33  | Yb2  | 71.8(2)    |
| C74A | Yb1  | C13  | 81.83(19)  | C32  | C33  | C34  | 126.0      |
| C74A | Yb1  | C14  | 78.84(19)  | C34  | C33  | Yb2  | 118.56(18) |
| C74A | Yb1  | C79A | 30.07(11)  | N7   | C40  | Yb2  | 44.2(3)    |
| C74A | Yb1  | C69A | 153.0(3)   | N7   | C40  | C41  | 122.5(5)   |
| C75A | Yb1  | C13  | 82.4(2)    | N9   | C40  | Yb2  | 161.3(4)   |
| C75A | Yb1  | C14  | 93.0(2)    | N9   | C40  | N7   | 117.4(5)   |
| C75A | Yb1  | C79A | 50.00(17)  | N9   | C40  | C41  | 120.1(5)   |
| C75A | Yb1  | C74A | 30.40(11)  | C41  | C40  | Yb2  | 78.3(3)    |
| C75A | Yb1  | C77A | 50.23(16)  | N6   | C41  | Yb2  | 41.4(3)    |

| Atom | Atom | Atom | Angle/°    | Atom | Atom | Atom | Angle/°    |
|------|------|------|------------|------|------|------|------------|
| C75A | Yb1  | C66A | 165.9(3)   | N6   | C41  | C40  | 115.5(5)   |
| C75A | Yb1  | C70A | 138.3(3)   | N8   | C41  | Yb2  | 170.8(4)   |
| C75A | Yb1  | C69A | 126.1(3)   | N8   | C41  | N6   | 129.3(5)   |
| C75A | Yb1  | C68A | 135.4(3)   | N8   | C41  | C40  | 115.1(5)   |
| C75A | Yb1  | C67A | 161.6(3)   | C40  | C41  | Yb2  | 74.1(3)    |
| C76A | Yb1  | C13  | 111.1(2)   | N9   | C42  | C43  | 131.6(6)   |
| C76A | Yb1  | C14  | 123.5(2)   | N9   | C42  | C47  | 107.3(5)   |
| C76A | Yb1  | C79A | 50.01(16)  | C47  | C42  | C43  | 121.1(6)   |
| C76A | Yb1  | C74A | 50.21(17)  | C44  | C43  | C42  | 117.2(7)   |
| C76A | Yb1  | C75A | 30.61(10)  | C43  | C44  | C45  | 121.4(6)   |
| C76A | Yb1  | C77A | 30.43(10)  | C46  | C45  | C44  | 122.6(6)   |
| C76A | Yb1  | C66A | 152.3(2)   | C45  | C46  | C47  | 116.5(7)   |
| C76A | Yb1  | C70A | 127.2(3)   | N7   | C47  | C42  | 109.7(5)   |
| C76A | Yb1  | C69A | 102.8(3)   | N7   | C47  | C46  | 129.2(6)   |
| C76A | Yb1  | C68A | 105.0(3)   | C42  | C47  | C46  | 121.1(6)   |
| C76A | Yb1  | C67A | 132.1(3)   | N10  | C48  | C49  | 121.9(7)   |
| C77A | Yb1  | C13  | 130.08(19) | C50  | C49  | C48  | 119.0(7)   |
| C77A | Yb1  | C14  | 127.13(19) | C49  | C50  | C51  | 119.0(7)   |
| C77A | Yb1  | C79A | 30.08(10)  | C52  | C51  | C50  | 119.0(7)   |
| C77A | Yb1  | C74A | 49.86(17)  | N10  | C52  | C51  | 122.6(7)   |
| C77A | Yb1  | C70A | 137.6(2)   | N11  | C54  | C55  | 122.3(7)   |
| C77A | Yb1  | C69A | 107.6(3)   | C54  | C55  | C56  | 119.5(7)   |
| C66A | Yb1  | C13  | 87.7(2)    | C57  | C56  | C55  | 118.1(6)   |
| C66A | Yb1  | C14  | 82.5(2)    | C58  | C57  | C56  | 120.0(7)   |
| C66A | Yb1  | C79A | 143.8(3)   | N11  | C58  | C57  | 121.7(7)   |
| C66A | Yb1  | C74A | 156.9(2)   | N2   | C60  | C61  | 131.8(6)   |
| C66A | Yb1  | C77A | 141.7(3)   | N2   | C60  | C65  | 107.6(5)   |
| C66A | Yb1  | C70A | 30.25(14)  | C61  | C60  | C65  | 120.6(6)   |
| C66A | Yb1  | C69A | 49.8(2)    | C62  | C61  | C60  | 117.9(6)   |
| C66A | Yb1  | C68A | 50.0(2)    | C61  | C62  | C63  | 121.6(6)   |
| C70A | Yb1  | C13  | 86.7(2)    | C64  | C63  | C62  | 120.8(6)   |
| C70A | Yb1  | C14  | 95.3(2)    | C63  | C64  | C65  | 118.8(6)   |
| C70A | Yb1  | C79A | 163.6(2)   | N12  | C65  | C60  | 108.8(5)   |
| C70A | Yb1  | C74A | 165.0(2)   | N12  | C65  | C64  | 131.0(6)   |
| C70A | Yb1  | C69A | 30.04(14)  | C64  | C65  | C60  | 120.2(6)   |
| C69A | Yb1  | C13  | 113.8(2)   | C69  | C70  | Yb1  | 75.34(16)  |
| C69A | Yb1  | C14  | 125.3(2)   | C69  | C70  | C66  | 108.0      |
| C69A | Yb1  | C79A | 135.4(3)   | C69  | C70  | C71  | 126.0      |
| C68A | Yb1  | C13  | 135.2(3)   | C66  | C70  | Yb1  | 73.52(17)  |
| C68A | Yb1  | C14  | 131.5(2)   | C66  | C70  | C71  | 126.0      |
| C68A | Yb1  | C79A | 113.9(3)   | C71  | C70  | Yb1  | 117.18(16) |
| C68A | Yb1  | C74A | 142.9(3)   | C70  | C69  | Yb1  | 73.69(16)  |
| C68A | Yb1  | C77A | 94.2(3)    | C70  | C69  | C68  | 108.0      |
| C68A | Yb1  | C70A | 49.7(2)    | C70  | C69  | C1   | 126.0      |

| Atom | Atom | Atom | Angle/°    | Atom | Atom | Atom | Angle/°    |
|------|------|------|------------|------|------|------|------------|
| C68A | Yb1  | C69A | 30.04(14)  | C68  | C69  | Yb1  | 74.18(16)  |
| C67A | Yb1  | C13  | 116.0(2)   | C68  | C69  | C1   | 126.0      |
| C67A | Yb1  | C14  | 103.0(2)   | C1   | C69  | Yb1  | 118.07(16) |
| C67A | Yb1  | C79A | 117.5(3)   | C69  | C68  | Yb1  | 74.91(17)  |
| C67A | Yb1  | C74A | 144.6(3)   | C69  | C68  | C72  | 126.0      |
| C67A | Yb1  | C77A | 111.7(3)   | C67  | C68  | Yb1  | 73.40(17)  |
| C67A | Yb1  | C66A | 30.46(14)  | C67  | C68  | C69  | 108.0      |
| C67A | Yb1  | C70A | 50.0(2)    | C67  | C68  | C72  | 126.0      |
| C67A | Yb1  | C69A | 49.9(2)    | C72  | C68  | Yb1  | 117.70(16) |
| C67A | Yb1  | C68A | 30.32(14)  | C68  | C67  | Yb1  | 75.49(17)  |
| N6   | Yb2  | N7   | 73.89(16)  | C68  | C67  | C66  | 108.0      |
| N6   | Yb2  | C25  | 96.2(2)    | C68  | C67  | C2   | 126.0      |
| N6   | Yb2  | C27  | 78.1(2)    | C66  | C67  | Yb1  | 74.05(16)  |
| N6   | Yb2  | C20  | 95.2(2)    | C66  | C67  | C2   | 126.0      |
| N6   | Yb2  | C21  | 125.5(2)   | C2   | C67  | Yb1  | 116.53(16) |
| N6   | Yb2  | C23  | 126.3(2)   | C70  | C66  | Yb1  | 75.25(17)  |
| N6   | Yb2  | C35  | 130.69(18) | C70  | C66  | C67  | 108.0      |
| N6   | Yb2  | C37  | 119.70(19) | C70  | C66  | C73  | 126.0      |
| N6   | Yb2  | C30  | 89.05(19)  | C67  | C66  | Yb1  | 74.61(17)  |
| N6   | Yb2  | C32  | 80.79(18)  | C67  | C66  | C73  | 126.0      |
| N6   | Yb2  | C33  | 105.03(17) | C73  | C66  | Yb1  | 116.21(16) |
| N6   | Yb2  | C40  | 50.04(15)  | C75  | C74  | Yb1  | 73.9(2)    |
| N6   | Yb2  | C41  | 22.54(15)  | C75  | C74  | C79  | 108.0      |
| N6   | Yb2  | C32A | 83.3(2)    | C75  | C74  | C83  | 126.0      |
| N6   | Yb2  | C33A | 113.5(2)   | C79  | C74  | Yb1  | 77.1(2)    |
| N6   | Yb2  | C35A | 130.6(2)   | C79  | C74  | C83  | 126.0      |
| N6   | Yb2  | C37A | 107.0(2)   | C83  | C74  | Yb1  | 115.2(2)   |
| N6   | Yb2  | C30A | 79.7(2)    | C74  | C75  | Yb1  | 74.6(2)    |
| N6   | Yb2  | C25A | 104.3(2)   | C74  | C75  | C76  | 108.0      |
| N6   | Yb2  | C27A | 82.34(19)  | C74  | C75  | C82  | 126.0      |
| N6   | Yb2  | C20A | 93.91(19)  | C76  | C75  | Yb1  | 76.8(2)    |
| N6   | Yb2  | C21A | 125.03(19) | C76  | C75  | C82  | 126.0      |
| N6   | Yb2  | C23A | 132.6(2)   | C82  | C75  | Yb1  | 114.8(2)   |
| N7   | Yb2  | C25  | 78.5(2)    | C75  | C76  | Yb1  | 72.1(2)    |
| N7   | Yb2  | C27  | 97.6(2)    | C75  | C76  | C81  | 126.0      |
| N7   | Yb2  | C20  | 127.6(2)   | C77  | C76  | Yb1  | 76.5(2)    |
| N7   | Yb2  | C21  | 124.8(2)   | C77  | C76  | C75  | 108.0      |
| N7   | Yb2  | C23  | 94.5(2)    | C77  | C76  | C81  | 126.0      |
| N7   | Yb2  | C35  | 118.47(19) | C81  | C76  | Yb1  | 117.3(2)   |
| N7   | Yb2  | C37  | 89.05(18)  | C76  | C77  | Yb1  | 72.9(2)    |
| N7   | Yb2  | C30  | 83.08(19)  | C76  | C77  | C78  | 126.0      |
| N7   | Yb2  | C32  | 109.10(19) | C79  | C77  | Yb1  | 73.6(2)    |
| N7   | Yb2  | C33  | 133.26(19) | C79  | C77  | C76  | 108.0      |
| N7   | Yb2  | C40  | 23.85(15)  | C79  | C77  | C78  | 126.0      |

| Atom | Atom | Atom | Angle/°   | Atom | Atom | Atom | Angle/°    |
|------|------|------|-----------|------|------|------|------------|
| N7   | Yb2  | C41  | 51.35(15) | C78  | C77  | Yb1  | 119.35(19) |
| N7   | Yb2  | C32A | 118.6(2)  | C74  | C79  | Yb1  | 71.9(2)    |
| N7   | Yb2  | C33A | 133.5(2)  | C74  | C79  | C80  | 126.0      |
| N7   | Yb2  | C35A | 107.6(2)  | C77  | C79  | Yb1  | 76.0(2)    |
| N7   | Yb2  | C37A | 81.9(2)   | C77  | C79  | C74  | 108.0      |
| N7   | Yb2  | C30A | 88.1(2)   | C77  | C79  | C80  | 126.0      |
| N7   | Yb2  | C25A | 81.3(2)   | C80  | C79  | Yb1  | 118.1(2)   |
| N7   | Yb2  | C27A | 95.7(2)   | C89  | C87  | C86  | 120.0      |
| N7   | Yb2  | C20A | 126.8(2)  | C88  | C87  | C89  | 113.6(17)  |
| N7   | Yb2  | C21A | 130.3(2)  | C88  | C87  | C86  | 126.1(17)  |
| N7   | Yb2  | C23A | 100.6(2)  | C90  | C89  | C87  | 120.0      |
| C25  | Yb2  | C20  | 51.3(2)   | C84  | C90  | C89  | 120.0      |
| C25  | Yb2  | C21  | 50.92(19) | C85  | C84  | C90  | 120.0      |
| C25  | Yb2  | C23  | 30.84(12) | C86  | C85  | C84  | 120.0      |
| C25  | Yb2  | C35  | 132.2(2)  | C85  | C86  | C87  | 120.0      |
| C25  | Yb2  | C37  | 137.1(2)  | C33A | C32A | Yb2  | 73.8(3)    |
| C25  | Yb2  | C32  | 170.4(2)  | C33A | C32A | C39A | 126.0      |
| C25  | Yb2  | C33  | 145.4(2)  | C30A | C32A | Yb2  | 74.9(3)    |
| C25  | Yb2  | C40  | 83.1(2)   | C30A | C32A | C33A | 108.0      |
| C25  | Yb2  | C41  | 91.1(2)   | C30A | C32A | C39A | 126.0      |
| C27  | Yb2  | C25  | 31.16(13) | C39A | C32A | Yb2  | 117.3(2)   |
| C27  | Yb2  | C20  | 31.10(14) | C32A | C33A | Yb2  | 74.9(3)    |
| C27  | Yb2  | C21  | 51.1(2)   | C32A | C33A | C35A | 108.0      |
| C27  | Yb2  | C23  | 51.1(2)   | C32A | C33A | C34A | 126.0      |
| C27  | Yb2  | C35  | 137.6(2)  | C35A | C33A | Yb2  | 74.5(2)    |
| C27  | Yb2  | C37  | 162.2(2)  | C35A | C33A | C34A | 126.0      |
| C27  | Yb2  | C32  | 139.6(2)  | C34A | C33A | Yb2  | 116.7(3)   |
| C27  | Yb2  | C33  | 128.5(2)  | C33A | C35A | Yb2  | 74.2(3)    |
| C27  | Yb2  | C40  | 90.6(2)   | C33A | C35A | C36A | 125.9      |
| C27  | Yb2  | C41  | 83.9(2)   | C37A | C35A | Yb2  | 75.0(3)    |
| C20  | Yb2  | C21  | 30.77(13) | C37A | C35A | C33A | 108.0      |
| C20  | Yb2  | C23  | 50.9(2)   | C37A | C35A | C36A | 126.1      |
| C20  | Yb2  | C35  | 107.4(2)  | C36A | C35A | Yb2  | 116.8(2)   |
| C20  | Yb2  | C37  | 136.5(2)  | C35A | C37A | Yb2  | 73.8(3)    |
| C20  | Yb2  | C32  | 119.7(2)  | C35A | C37A | C30A | 108.0      |
| C20  | Yb2  | C33  | 99.2(2)   | C35A | C37A | C38A | 126.0      |
| C20  | Yb2  | C40  | 121.2(2)  | C30A | C37A | Yb2  | 74.7(2)    |
| C20  | Yb2  | C41  | 109.0(2)  | C30A | C37A | C38A | 126.0      |
| C21  | Yb2  | C35  | 88.3(2)   | C38A | C37A | Yb2  | 117.5(3)   |
| C21  | Yb2  | C33  | 94.5(2)   | C32A | C30A | Yb2  | 74.0(3)    |
| C21  | Yb2  | C40  | 134.0(2)  | C32A | C30A | C37A | 108.0      |
| C21  | Yb2  | C41  | 135.0(2)  | C32A | C30A | C31A | 126.0      |
| C23  | Yb2  | C21  | 30.63(12) | C37A | C30A | Yb2  | 74.2(2)    |
| C23  | Yb2  | C35  | 101.3(2)  | C37A | C30A | C31A | 126.0      |

| Atom | Atom | Atom | Angle/°    | Atom | Atom | Atom | Angle/°  |
|------|------|------|------------|------|------|------|----------|
| C23  | Yb2  | C37  | 112.1(2)   | C31A | C30A | Yb2  | 117.8(3) |
| C23  | Yb2  | C33  | 119.0(2)   | C27A | C25A | Yb2  | 73.0(3)  |
| C23  | Yb2  | C40  | 107.7(2)   | C27A | C25A | C23A | 108.0    |
| C23  | Yb2  | C41  | 121.3(2)   | C27A | C25A | C26A | 126.0    |
| C35  | Yb2  | C40  | 131.33(18) | C23A | C25A | Yb2  | 75.0(2)  |
| C35  | Yb2  | C41  | 135.50(17) | C23A | C25A | C26A | 126.0    |
| C37  | Yb2  | C21  | 111.9(2)   | C26A | C25A | Yb2  | 118.1(3) |
| C37  | Yb2  | C35  | 30.09(9)   | C25A | C27A | Yb2  | 76.2(2)  |
| C37  | Yb2  | C33  | 49.85(14)  | C25A | C27A | C20A | 108.0    |
| C37  | Yb2  | C40  | 101.67(18) | C25A | C27A | C28A | 126.0    |
| C37  | Yb2  | C41  | 112.81(18) | C20A | C27A | Yb2  | 73.6(2)  |
| C30  | Yb2  | C25  | 158.6(2)   | C20A | C27A | C28A | 126.0    |
| C30  | Yb2  | C27  | 166.3(2)   | C28A | C27A | Yb2  | 116.3(2) |
| C30  | Yb2  | C20  | 149.0(2)   | C27A | C20A | Yb2  | 75.2(2)  |
| C30  | Yb2  | C21  | 138.5(2)   | C27A | C20A | C21A | 108.0    |
| C30  | Yb2  | C23  | 142.5(2)   | C27A | C20A | C29A | 126.0    |
| C30  | Yb2  | C35  | 50.22(14)  | C21A | C20A | Yb2  | 75.6(2)  |
| C30  | Yb2  | C37  | 30.85(9)   | C21A | C20A | C29A | 126.0    |
| C30  | Yb2  | C32  | 30.99(9)   | C29A | C20A | Yb2  | 115.5(2) |
| C30  | Yb2  | C33  | 50.36(14)  | C20A | C21A | Yb2  | 73.3(2)  |
| C30  | Yb2  | C40  | 84.55(17)  | C20A | C21A | C22A | 126.0    |
| C30  | Yb2  | C41  | 85.91(17)  | C23A | C21A | Yb2  | 76.1(2)  |
| C32  | Yb2  | C21  | 123.9(2)   | C23A | C21A | C20A | 108.0    |
| C32  | Yb2  | C23  | 149.0(2)   | C23A | C21A | C22A | 126.0    |
| C32  | Yb2  | C35  | 49.91(14)  | C22A | C21A | Yb2  | 116.6(2) |
| C32  | Yb2  | C37  | 50.66(14)  | C25A | C23A | Yb2  | 74.5(2)  |
| C32  | Yb2  | C33  | 30.28(9)   | C25A | C23A | C24A | 126.0    |
| C32  | Yb2  | C40  | 101.60(17) | C21A | C23A | Yb2  | 73.2(3)  |
| C32  | Yb2  | C41  | 89.51(17)  | C21A | C23A | C25A | 108.0    |
| C33  | Yb2  | C35  | 29.79(9)   | C21A | C23A | C24A | 126.0    |
| C33  | Yb2  | C40  | 131.44(17) | C24A | C23A | Yb2  | 118.2(2) |
| C33  | Yb2  | C41  | 118.50(17) | C74A | C79A | Yb1  | 74.2(2)  |
| C40  | Yb2  | C41  | 27.52(14)  | C74A | C79A | C80A | 126.0    |
| C32A | Yb2  | C40  | 109.8(2)   | C77A | C79A | Yb1  | 74.1(2)  |
| C32A | Yb2  | C41  | 95.1(2)    | C77A | C79A | C74A | 108.0    |
| C32A | Yb2  | C37A | 51.54(19)  | C77A | C79A | C80A | 126.0    |
| C32A | Yb2  | C30A | 31.13(12)  | C80A | C79A | Yb1  | 117.7(2) |
| C32A | Yb2  | C25A | 160.1(2)   | C79A | C74A | Yb1  | 75.8(2)  |
| C32A | Yb2  | C27A | 137.1(2)   | C79A | C74A | C75A | 108.0    |
| C32A | Yb2  | C20A | 110.8(2)   | C79A | C74A | C83A | 126.0    |
| C32A | Yb2  | C21A | 109.7(3)   | C75A | C74A | Yb1  | 73.4(2)  |
| C32A | Yb2  | C23A | 134.3(3)   | C75A | C74A | C83A | 125.9    |
| C33A | Yb2  | C40  | 136.2(2)   | C83A | C74A | Yb1  | 116.9(2) |
| C33A | Yb2  | C41  | 126.3(2)   | C74A | C75A | Yb1  | 76.2(3)  |

| Atom | Atom | Atom | Angle/°    | Atom | Atom | Atom | Angle/°  |
|------|------|------|------------|------|------|------|----------|
| C33A | Yb2  | C32A | 31.28(13)  | C74A | C75A | C82A | 126.0    |
| C33A | Yb2  | C35A | 31.36(13)  | C76A | C75A | Yb1  | 74.6(2)  |
| C33A | Yb2  | C37A | 51.7(2)    | C76A | C75A | C74A | 108.0    |
| C33A | Yb2  | C30A | 51.61(19)  | C76A | C75A | C82A | 126.0    |
| C33A | Yb2  | C25A | 133.7(3)   | C82A | C75A | Yb1  | 115.4(2) |
| C33A | Yb2  | C27A | 130.4(2)   | C75A | C76A | Yb1  | 74.8(2)  |
| C33A | Yb2  | C20A | 99.3(2)    | C75A | C76A | C77A | 108.0    |
| C33A | Yb2  | C21A | 85.0(3)    | C75A | C76A | C81A | 126.0    |
| C33A | Yb2  | C23A | 104.0(3)   | C77A | C76A | Yb1  | 76.1(2)  |
| C35A | Yb2  | C40  | 121.4(2)   | C77A | C76A | C81A | 126.0    |
| C35A | Yb2  | C41  | 130.0(2)   | C81A | C76A | Yb1  | 115.3(3) |
| C35A | Yb2  | C32A | 51.7(2)    | C79A | C77A | Yb1  | 75.8(3)  |
| C35A | Yb2  | C37A | 31.21(12)  | C79A | C77A | C76A | 108.0    |
| C35A | Yb2  | C30A | 51.57(19)  | C79A | C77A | C78A | 126.0    |
| C35A | Yb2  | C25A | 125.0(3)   | C76A | C77A | Yb1  | 73.4(2)  |
| C35A | Yb2  | C27A | 143.4(2)   | C76A | C77A | C78A | 126.0    |
| C35A | Yb2  | C20A | 118.3(2)   | C78A | C77A | Yb1  | 116.8(2) |
| C35A | Yb2  | C21A | 92.5(3)    | C70A | C66A | Yb1  | 76.0(3)  |
| C35A | Yb2  | C23A | 96.3(3)    | C70A | C66A | C67A | 108.0    |
| C37A | Yb2  | C40  | 91.0(2)    | C70A | C66A | C73A | 126.1    |
| C37A | Yb2  | C41  | 99.9(2)    | C67A | C66A | Yb1  | 74.7(3)  |
| C37A | Yb2  | C30A | 31.11(12)  | C67A | C66A | C73A | 125.9    |
| C37A | Yb2  | C25A | 138.5(2)   | C73A | C66A | Yb1  | 115.5(3) |
| C37A | Yb2  | C27A | 169.1(2)   | C66A | C70A | Yb1  | 73.8(3)  |
| C37A | Yb2  | C20A | 149.0(2)   | C66A | C70A | C69A | 108.1    |
| C37A | Yb2  | C21A | 123.1(3)   | C66A | C70A | C71A | 126.0    |
| C37A | Yb2  | C23A | 119.0(2)   | C69A | C70A | Yb1  | 75.6(3)  |
| C30A | Yb2  | C40  | 84.6(2)    | C69A | C70A | C71A | 125.9    |
| C30A | Yb2  | C41  | 80.3(2)    | C71A | C70A | Yb1  | 116.7(3) |
| C30A | Yb2  | C25A | 167.1(2)   | C70A | C69A | Yb1  | 74.4(3)  |
| C30A | Yb2  | C27A | 159.8(2)   | C70A | C69A | C1A  | 126.1    |
| C30A | Yb2  | C21A | 136.6(2)   | C68A | C69A | Yb1  | 74.2(3)  |
| C30A | Yb2  | C23A | 147.7(2)   | C68A | C69A | C70A | 107.9    |
| C25A | Yb2  | C40  | 88.63(19)  | C68A | C69A | C1A  | 126.0    |
| C25A | Yb2  | C41  | 98.6(2)    | C1A  | C69A | Yb1  | 117.4(3) |
| C25A | Yb2  | C23A | 30.57(10)  | C69A | C68A | Yb1  | 75.7(3)  |
| C27A | Yb2  | C40  | 90.83(18)  | C69A | C68A | C67A | 108.0    |
| C27A | Yb2  | C41  | 86.60(18)  | C69A | C68A | C72A | 126.0    |
| C27A | Yb2  | C25A | 30.80(10)  | C67A | C68A | Yb1  | 73.8(3)  |
| C27A | Yb2  | C21A | 51.27(18)  | C67A | C68A | C72A | 126.0    |
| C27A | Yb2  | C23A | 50.87(16)  | C72A | C68A | Yb1  | 116.6(3) |
| C20A | Yb2  | C40  | 119.98(18) | C66A | C67A | Yb1  | 74.8(3)  |
| C20A | Yb2  | C41  | 107.58(18) | C66A | C67A | C68A | 107.9    |
| C20A | Yb2  | C30A | 141.5(2)   | C66A | C67A | C2A  | 126.0    |



| Atom | Atom | Atom | Angle/°   | Atom | Atom | Atom | Angle/°   |
|------|------|------|-----------|------|------|------|-----------|
| C20A | Yb2  | C25A | 51.12(17) | C68A | C67A | Yb1  | 75.9(3)   |
| C20A | Yb2  | C27A | 31.19(12) | C68A | C67A | C2A  | 126.0     |
| C20A | Yb2  | C21A | 31.13(12) | C2A  | C67A | Yb1  | 115.4(3)  |
| C20A | Yb2  | C23A | 51.05(17) | C94  | C3   | C4   | 119.9     |
| C21A | Yb2  | C40  | 138.8(2)  | C91  | C4   | C3   | 120.0     |
| C21A | Yb2  | C41  | 137.0(2)  | C4   | C91  | C92  | 120.0     |
| C21A | Yb2  | C25A | 50.84(16) | C91  | C92  | C95  | 123.9(16) |
| C21A | Yb2  | C23A | 30.70(11) | C93  | C92  | C91  | 120.0     |
| C23A | Yb2  | C40  | 115.2(2)  | C93  | C92  | C95  | 115.9(17) |
| C23A | Yb2  | C41  | 129.1(2)  | C92  | C93  | C94  | 119.9     |
| N2   | Pd1  | N3   | 80.50(19) | C3   | C94  | C93  | 120.1     |
| N11  | Pd1  | N2   | 173.8(2)  | C91A | C92A | C93A | 120.0     |
| N11  | Pd1  | N3   | 96.1(2)   | C95A | C92A | C91A | 118.6(16) |
| N11  | Pd1  | C59  | 88.8(2)   | C95A | C92A | C93A | 121.3(16) |
| C59  | Pd1  | N2   | 94.2(2)   | C92A | C91A | C4A  | 120.0     |
| C59  | Pd1  | N3   | 173.8(2)  | C91A | C4A  | C3A  | 120.0     |
| N9   | Pd2  | N8   | 79.82(18) | C94A | C3A  | C4A  | 120.0     |
| N10  | Pd2  | N8   | 96.7(2)   | C93A | C94A | C3A  | 120.0     |
| N10  | Pd2  | N9   | 174.1(2)  | C94A | C93A | C92A | 120.0     |
| C53  | Pd2  | N8   | 173.4(3)  | C89A | C87A | C86A | 120.0     |
| C53  | Pd2  | N9   | 93.8(3)   | C89A | C87A | C88A | 127.3(15) |
| C53  | Pd2  | N10  | 89.5(3)   | C86A | C87A | C88A | 112.7(15) |
| C13  | N2   | Pd1  | 110.2(4)  | C90A | C89A | C87A | 120.0     |
| C13  | N2   | C60  | 104.7(5)  | C89A | C90A | C84A | 120.0     |
| C60  | N2   | Pd1  | 143.5(4)  | C90A | C84A | C85A | 120.0     |
| C14  | N3   | Pd1  | 110.2(4)  | C84A | C85A | C86A | 120.0     |
| C14  | N3   | C16  | 117.2(5)  | C85A | C86A | C87A | 120.0     |

*Table S6. Bond Lengths for 3.*

| Atom | Atom | Length/Å  | Atom | Atom | Length/Å  |
|------|------|-----------|------|------|-----------|
| Yb1  | N3   | 2.328(9)  | C15  | C16  | 1.394(17) |
| Yb1  | N4   | 2.365(10) | C18  | C22  | 1.464(16) |
| Yb1  | C35  | 2.609(11) | C19  | C20  | 1.473(14) |
| Yb1  | C36  | 2.626(12) | C20  | C21  | 1.339(15) |
| Yb1  | C37  | 2.660(12) | C23  | C24  | 1.411(16) |
| Yb1  | C38  | 2.659(12) | C23  | C28  | 1.423(17) |
| Yb1  | C39  | 2.609(12) | C24  | C25  | 1.414(17) |
| Yb1  | C45  | 2.600(12) | C25  | C26  | 1.400(18) |
| Yb1  | C46  | 2.613(12) | C26  | C27  | 1.401(19) |
| Yb1  | C47  | 2.615(12) | C27  | C28  | 1.426(18) |
| Yb1  | C48  | 2.617(13) | C29  | C30  | 1.374(17) |
| Yb1  | C49  | 2.658(12) | C30  | C31  | 1.39(2)   |

| Atom | Atom | Length/Å  | Atom | Atom | Length/Å  |
|------|------|-----------|------|------|-----------|
| Yb2  | N8   | 2.321(8)  | C31  | C32  | 1.42(2)   |
| Yb2  | N9   | 2.321(10) | C32  | C33  | 1.412(18) |
| Yb2  | C55  | 2.638(17) | C35  | C36  | 1.455(17) |
| Yb2  | C56  | 2.630(14) | C35  | C39  | 1.404(17) |
| Yb2  | C57  | 2.596(14) | C35  | C41  | 1.477(16) |
| Yb2  | C58  | 2.638(13) | C36  | C37  | 1.382(17) |
| Yb2  | C59  | 2.619(14) | C36  | C42  | 1.467(17) |
| Yb2  | C65  | 2.593(12) | C37  | C38  | 1.385(17) |
| Yb2  | C66  | 2.637(12) | C37  | C43  | 1.517(17) |
| Yb2  | C67  | 2.651(13) | C38  | C39  | 1.433(17) |
| Yb2  | C68  | 2.628(13) | C38  | C44  | 1.530(18) |
| Yb2  | C69  | 2.618(12) | C39  | C40  | 1.537(17) |
| Pd1  | N1   | 2.039(9)  | C45  | C46  | 1.431(18) |
| Pd1  | N2   | 2.192(9)  | C45  | C49  | 1.396(18) |
| Pd1  | N5   | 2.029(10) | C45  | C51  | 1.485(17) |
| Pd1  | C17  | 2.013(11) | C46  | C47  | 1.363(16) |
| Pd2  | N6   | 2.045(8)  | C46  | C52  | 1.492(18) |
| Pd2  | N7   | 2.182(10) | C47  | C48  | 1.425(17) |
| Pd2  | N10  | 2.014(9)  | C47  | C53  | 1.554(19) |
| Pd2  | C34  | 2.000(12) | C48  | C49  | 1.407(17) |
| N1   | C1   | 1.321(13) | C48  | C54  | 1.535(17) |
| N1   | C4   | 1.478(13) | C49  | C50  | 1.525(18) |
| N2   | C5   | 1.326(13) | C55  | C56  | 1.39(2)   |
| N2   | C7   | 1.398(13) | C55  | C59  | 1.39(2)   |
| N3   | C1   | 1.350(13) | C55  | C61  | 1.53(2)   |
| N3   | C2   | 1.408(13) | C56  | C57  | 1.410(19) |
| N4   | C5   | 1.358(13) | C56  | C62  | 1.553(19) |
| N4   | C6   | 1.407(13) | C57  | C58  | 1.38(2)   |
| N5   | C12  | 1.384(14) | C57  | C63  | 1.511(19) |
| N5   | C16  | 1.364(15) | C58  | C59  | 1.410(19) |
| N6   | C18  | 1.309(13) | C58  | C64  | 1.561(19) |
| N6   | C19  | 1.486(13) | C59  | C60  | 1.59(2)   |
| N7   | C22  | 1.336(13) | C65  | C66  | 1.409(17) |
| N7   | C23  | 1.373(15) | C65  | C69  | 1.438(16) |
| N8   | C18  | 1.376(13) | C65  | C71  | 1.520(18) |
| N8   | C21  | 1.385(13) | C66  | C67  | 1.456(19) |
| N9   | C22  | 1.353(14) | C66  | C72  | 1.511(16) |
| N9   | C24  | 1.418(15) | C67  | C68  | 1.415(15) |
| N10  | C29  | 1.383(14) | C67  | C73  | 1.507(17) |
| N10  | C33  | 1.371(15) | C68  | C69  | 1.408(17) |
| C1   | C5   | 1.470(14) | C68  | C74  | 1.512(16) |
| C2   | C3   | 1.299(15) | C69  | C70  | 1.527(15) |
| C3   | C4   | 1.517(15) | O1   | C75  | 1.49(3)   |
| C4   | C19  | 1.556(15) | O1   | C78  | 1.38(3)   |

| Atom | Atom | Length/Å  | Atom | Atom | Length/Å |
|------|------|-----------|------|------|----------|
| C6   | C7   | 1.398(16) | C75  | C76  | 1.41(2)  |
| C6   | C11  | 1.390(15) | C76  | C77  | 1.63(3)  |
| C7   | C8   | 1.412(16) | C77  | C78  | 1.37(2)  |
| C8   | C9   | 1.435(17) | O2   | C79  | 1.30(2)  |
| C9   | C10  | 1.388(18) | O2   | C82  | 1.42(2)  |
| C10  | C11  | 1.370(17) | C79  | C80  | 1.40(2)  |
| C12  | C13  | 1.391(17) | C80  | C81  | 1.46(2)  |
| C13  | C14  | 1.391(18) | C81  | C82  | 1.48(2)  |
| C14  | C15  | 1.323(19) |      |      |          |

Table S7. Bond Angles for 3.

| Atom | Atom | Atom | Angle/°  | Atom | Atom | Atom | Angle/°   |
|------|------|------|----------|------|------|------|-----------|
| N3   | Yb1  | N4   | 72.9(3)  | C3   | C4   | C19  | 110.3(9)  |
| N3   | Yb1  | C35  | 103.2(4) | N2   | C5   | Yb1  | 162.0(7)  |
| N3   | Yb1  | C36  | 79.1(4)  | N2   | C5   | N4   | 117.4(9)  |
| N3   | Yb1  | C37  | 90.7(3)  | N2   | C5   | C1   | 119.8(10) |
| N3   | Yb1  | C38  | 120.8(4) | N4   | C5   | Yb1  | 44.6(5)   |
| N3   | Yb1  | C39  | 131.4(4) | N4   | C5   | C1   | 122.7(10) |
| N3   | Yb1  | C45  | 123.7(4) | C1   | C5   | Yb1  | 78.2(6)   |
| N3   | Yb1  | C46  | 91.9(4)  | C7   | C6   | N4   | 107.8(9)  |
| N3   | Yb1  | C47  | 78.6(3)  | C11  | C6   | N4   | 130.8(11) |
| N3   | Yb1  | C48  | 99.2(4)  | C11  | C6   | C7   | 121.3(11) |
| N3   | Yb1  | C49  | 128.3(4) | N2   | C7   | C6   | 109.4(9)  |
| N4   | Yb1  | C35  | 80.5(3)  | N2   | C7   | C8   | 129.3(11) |
| N4   | Yb1  | C36  | 93.6(4)  | C6   | C7   | C8   | 121.1(11) |
| N4   | Yb1  | C37  | 123.8(4) | C7   | C8   | C9   | 115.3(12) |
| N4   | Yb1  | C38  | 131.0(4) | C10  | C9   | C8   | 122.0(11) |
| N4   | Yb1  | C39  | 101.9(4) | C11  | C10  | C9   | 120.7(11) |
| N4   | Yb1  | C45  | 93.5(4)  | C10  | C11  | C6   | 119.0(12) |
| N4   | Yb1  | C46  | 82.0(3)  | N5   | C12  | C13  | 121.9(11) |
| N4   | Yb1  | C47  | 103.7(3) | C14  | C13  | C12  | 117.8(12) |
| N4   | Yb1  | C48  | 133.1(4) | C15  | C14  | C13  | 121.4(13) |
| N4   | Yb1  | C49  | 124.3(4) | C14  | C15  | C16  | 119.7(14) |
| C35  | Yb1  | C36  | 32.3(4)  | N5   | C16  | C15  | 122.1(12) |
| C35  | Yb1  | C37  | 51.0(4)  | N6   | C18  | Yb2  | 168.7(8)  |
| C35  | Yb1  | C38  | 51.2(4)  | N6   | C18  | N8   | 128.5(10) |
| C35  | Yb1  | C39  | 31.2(4)  | N6   | C18  | C22  | 116.5(9)  |
| C35  | Yb1  | C46  | 152.3(4) | N8   | C18  | Yb2  | 40.9(5)   |
| C35  | Yb1  | C47  | 175.9(4) | N8   | C18  | C22  | 115.0(10) |
| C35  | Yb1  | C48  | 144.3(4) | C22  | C18  | Yb2  | 74.1(6)   |
| C35  | Yb1  | C49  | 126.4(4) | N6   | C19  | C4   | 111.5(9)  |
| C36  | Yb1  | C37  | 30.3(4)  | C20  | C19  | N6   | 110.8(9)  |
| C36  | Yb1  | C38  | 51.0(4)  | C20  | C19  | C4   | 109.7(9)  |
| C36  | Yb1  | C49  | 136.6(4) | C21  | C20  | C19  | 119.8(11) |

| Atom | Atom | Atom | Angle/°  | Atom | Atom | Atom | Angle/°   |
|------|------|------|----------|------|------|------|-----------|
| C38  | Yb1  | C37  | 30.2(4)  | C20  | C21  | N8   | 123.3(10) |
| C39  | Yb1  | C36  | 52.6(4)  | N7   | C22  | Yb2  | 160.6(8)  |
| C39  | Yb1  | C37  | 51.3(4)  | N7   | C22  | N9   | 117.5(10) |
| C39  | Yb1  | C38  | 31.5(4)  | N7   | C22  | C18  | 120.2(10) |
| C39  | Yb1  | C46  | 136.1(4) | N9   | C22  | Yb2  | 43.2(6)   |
| C39  | Yb1  | C47  | 145.6(4) | N9   | C22  | C18  | 122.1(10) |
| C39  | Yb1  | C48  | 115.7(4) | C18  | C22  | Yb2  | 79.0(6)   |
| C39  | Yb1  | C49  | 95.4(4)  | N7   | C23  | C24  | 108.5(10) |
| C45  | Yb1  | C35  | 128.7(4) | N7   | C23  | C28  | 131.5(11) |
| C45  | Yb1  | C36  | 157.1(4) | C24  | C23  | C28  | 120.0(12) |
| C45  | Yb1  | C37  | 136.7(4) | C23  | C24  | N9   | 108.5(11) |
| C45  | Yb1  | C38  | 109.3(4) | C23  | C24  | C25  | 120.4(12) |
| C45  | Yb1  | C39  | 104.7(4) | C25  | C24  | N9   | 131.0(12) |
| C45  | Yb1  | C46  | 31.9(4)  | C26  | C25  | C24  | 118.9(13) |
| C45  | Yb1  | C47  | 51.3(4)  | C25  | C26  | C27  | 122.1(13) |
| C45  | Yb1  | C48  | 51.8(4)  | C26  | C27  | C28  | 119.0(13) |
| C45  | Yb1  | C49  | 30.8(4)  | C23  | C28  | C27  | 119.4(12) |
| C46  | Yb1  | C36  | 170.9(4) | C30  | C29  | N10  | 122.2(12) |
| C46  | Yb1  | C37  | 153.5(4) | C29  | C30  | C31  | 121.2(13) |
| C46  | Yb1  | C38  | 137.2(4) | C30  | C31  | C32  | 118.7(13) |
| C46  | Yb1  | C47  | 30.2(4)  | C33  | C32  | C31  | 116.7(14) |
| C46  | Yb1  | C48  | 51.6(4)  | N10  | C33  | C32  | 124.8(12) |
| C46  | Yb1  | C49  | 51.2(4)  | C36  | C35  | Yb1  | 74.5(6)   |
| C47  | Yb1  | C36  | 146.3(4) | C36  | C35  | C41  | 123.5(12) |
| C47  | Yb1  | C37  | 125.6(4) | C39  | C35  | Yb1  | 74.4(7)   |
| C47  | Yb1  | C38  | 124.6(4) | C39  | C35  | C36  | 108.3(11) |
| C47  | Yb1  | C48  | 31.6(4)  | C39  | C35  | C41  | 127.6(12) |
| C47  | Yb1  | C49  | 50.9(4)  | C41  | C35  | Yb1  | 123.5(8)  |
| C48  | Yb1  | C36  | 131.1(4) | C35  | C36  | Yb1  | 73.2(6)   |
| C48  | Yb1  | C37  | 101.9(4) | C35  | C36  | C42  | 127.9(13) |
| C48  | Yb1  | C38  | 93.4(4)  | C37  | C36  | Yb1  | 76.2(7)   |
| C48  | Yb1  | C49  | 30.9(4)  | C37  | C36  | C35  | 106.1(11) |
| C49  | Yb1  | C37  | 108.3(4) | C37  | C36  | C42  | 125.3(12) |
| C49  | Yb1  | C38  | 86.0(4)  | C42  | C36  | Yb1  | 123.3(9)  |
| N8   | Yb2  | C55  | 93.4(4)  | C36  | C37  | Yb1  | 73.5(7)   |
| N8   | Yb2  | C56  | 80.0(4)  | C36  | C37  | C38  | 110.7(11) |
| N8   | Yb2  | C57  | 100.7(4) | C36  | C37  | C43  | 123.6(12) |
| N8   | Yb2  | C58  | 129.4(4) | C38  | C37  | Yb1  | 74.9(7)   |
| N8   | Yb2  | C59  | 124.1(4) | C38  | C37  | C43  | 125.5(13) |
| N8   | Yb2  | C65  | 131.8(4) | C43  | C37  | Yb1  | 122.4(8)  |
| N8   | Yb2  | C66  | 120.7(4) | C37  | C38  | Yb1  | 74.9(7)   |
| N8   | Yb2  | C67  | 88.9(4)  | C37  | C38  | C39  | 108.0(11) |
| N8   | Yb2  | C68  | 79.3(3)  | C37  | C38  | C44  | 125.5(13) |
| N8   | Yb2  | C69  | 103.2(4) | C39  | C38  | Yb1  | 72.3(7)   |

| Atom | Atom | Atom | Angle/°  | Atom | Atom | Atom | Angle/°   |
|------|------|------|----------|------|------|------|-----------|
| N9   | Yb2  | N8   | 73.2(3)  | C39  | C38  | C44  | 125.4(12) |
| N9   | Yb2  | C55  | 79.6(4)  | C44  | C38  | Yb1  | 128.0(9)  |
| N9   | Yb2  | C56  | 101.8(4) | C35  | C39  | Yb1  | 74.4(7)   |
| N9   | Yb2  | C57  | 130.5(4) | C35  | C39  | C38  | 106.8(11) |
| N9   | Yb2  | C58  | 121.9(4) | C35  | C39  | C40  | 125.1(13) |
| N9   | Yb2  | C59  | 90.8(4)  | C38  | C39  | Yb1  | 76.1(7)   |
| N9   | Yb2  | C65  | 103.2(4) | C38  | C39  | C40  | 127.7(13) |
| N9   | Yb2  | C66  | 132.0(4) | C40  | C39  | Yb1  | 121.2(9)  |
| N9   | Yb2  | C67  | 123.7(4) | C46  | C45  | Yb1  | 74.6(7)   |
| N9   | Yb2  | C68  | 92.6(4)  | C46  | C45  | C51  | 127.9(13) |
| N9   | Yb2  | C69  | 80.9(4)  | C49  | C45  | Yb1  | 76.9(7)   |
| C55  | Yb2  | C58  | 50.8(4)  | C49  | C45  | C46  | 107.5(11) |
| C55  | Yb2  | C67  | 156.0(4) | C49  | C45  | C51  | 123.9(13) |
| C56  | Yb2  | C55  | 30.6(4)  | C51  | C45  | Yb1  | 122.2(9)  |
| C56  | Yb2  | C58  | 50.6(4)  | C45  | C46  | Yb1  | 73.6(7)   |
| C56  | Yb2  | C66  | 125.1(4) | C45  | C46  | C52  | 124.5(13) |
| C56  | Yb2  | C67  | 127.5(4) | C47  | C46  | Yb1  | 75.0(7)   |
| C57  | Yb2  | C55  | 51.3(5)  | C47  | C46  | C45  | 107.8(11) |
| C57  | Yb2  | C56  | 31.3(4)  | C47  | C46  | C52  | 127.5(14) |
| C57  | Yb2  | C58  | 30.5(4)  | C52  | C46  | Yb1  | 121.0(9)  |
| C57  | Yb2  | C59  | 51.2(5)  | C46  | C47  | Yb1  | 74.8(8)   |
| C57  | Yb2  | C66  | 94.1(4)  | C46  | C47  | C48  | 109.5(11) |
| C57  | Yb2  | C67  | 104.8(4) | C46  | C47  | C53  | 126.2(12) |
| C57  | Yb2  | C68  | 135.5(4) | C48  | C47  | Yb1  | 74.2(7)   |
| C57  | Yb2  | C69  | 145.3(4) | C48  | C47  | C53  | 124.0(13) |
| C58  | Yb2  | C67  | 110.8(4) | C53  | C47  | Yb1  | 122.3(8)  |
| C59  | Yb2  | C55  | 30.7(4)  | C47  | C48  | Yb1  | 74.1(7)   |
| C59  | Yb2  | C56  | 50.7(5)  | C47  | C48  | C54  | 125.4(12) |
| C59  | Yb2  | C58  | 31.1(4)  | C49  | C48  | Yb1  | 76.1(7)   |
| C59  | Yb2  | C66  | 109.9(5) | C49  | C48  | C47  | 106.3(11) |
| C59  | Yb2  | C67  | 139.6(4) | C49  | C48  | C54  | 127.8(12) |
| C59  | Yb2  | C68  | 156.3(4) | C54  | C48  | Yb1  | 120.9(9)  |
| C65  | Yb2  | C55  | 134.0(5) | C45  | C49  | Yb1  | 72.3(7)   |
| C65  | Yb2  | C56  | 144.3(4) | C45  | C49  | C48  | 108.7(11) |
| C65  | Yb2  | C57  | 114.9(4) | C45  | C49  | C50  | 124.7(12) |
| C65  | Yb2  | C58  | 94.2(4)  | C48  | C49  | Yb1  | 72.9(7)   |
| C65  | Yb2  | C59  | 103.8(5) | C48  | C49  | C50  | 126.2(13) |
| C65  | Yb2  | C66  | 31.3(4)  | C50  | C49  | Yb1  | 126.8(9)  |
| C65  | Yb2  | C67  | 52.3(4)  | C56  | C55  | Yb2  | 74.4(9)   |
| C65  | Yb2  | C68  | 52.6(4)  | C56  | C55  | C59  | 107.9(13) |
| C65  | Yb2  | C69  | 32.0(4)  | C56  | C55  | C61  | 128.5(16) |
| C66  | Yb2  | C55  | 137.1(4) | C59  | C55  | Yb2  | 73.9(10)  |
| C66  | Yb2  | C58  | 86.3(4)  | C59  | C55  | C61  | 123.2(16) |
| C66  | Yb2  | C67  | 32.0(4)  | C61  | C55  | Yb2  | 123.4(11) |

| Atom | Atom | Atom | Angle/°   | Atom | Atom | Atom | Angle/°   |
|------|------|------|-----------|------|------|------|-----------|
| C68  | Yb2  | C55  | 170.7(4)  | C55  | C56  | Yb2  | 75.0(10)  |
| C68  | Yb2  | C56  | 150.0(4)  | C55  | C56  | C57  | 108.1(13) |
| C68  | Yb2  | C58  | 138.5(4)  | C55  | C56  | C62  | 125.7(13) |
| C68  | Yb2  | C66  | 52.3(4)   | C57  | C56  | Yb2  | 73.0(8)   |
| C68  | Yb2  | C67  | 31.1(3)   | C57  | C56  | C62  | 126.1(15) |
| C69  | Yb2  | C55  | 149.4(5)  | C62  | C56  | Yb2  | 122.1(9)  |
| C69  | Yb2  | C56  | 176.3(4)  | C56  | C57  | Yb2  | 75.7(8)   |
| C69  | Yb2  | C58  | 125.8(4)  | C56  | C57  | C63  | 125.0(15) |
| C69  | Yb2  | C59  | 127.2(5)  | C58  | C57  | Yb2  | 76.5(8)   |
| C69  | Yb2  | C66  | 51.9(4)   | C58  | C57  | C56  | 107.9(13) |
| C69  | Yb2  | C67  | 51.4(4)   | C58  | C57  | C63  | 126.4(14) |
| C69  | Yb2  | C68  | 31.1(4)   | C63  | C57  | Yb2  | 121.7(10) |
| N1   | Pd1  | N2   | 79.5(3)   | C57  | C58  | Yb2  | 73.1(8)   |
| N5   | Pd1  | N1   | 177.1(4)  | C57  | C58  | C59  | 108.0(13) |
| N5   | Pd1  | N2   | 100.2(3)  | C57  | C58  | C64  | 128.0(14) |
| C17  | Pd1  | N1   | 92.8(4)   | C59  | C58  | Yb2  | 73.7(8)   |
| C17  | Pd1  | N2   | 168.5(4)  | C59  | C58  | C64  | 123.3(14) |
| C17  | Pd1  | N5   | 87.9(5)   | C64  | C58  | Yb2  | 126.3(11) |
| N6   | Pd2  | N7   | 80.2(3)   | C55  | C59  | Yb2  | 75.4(9)   |
| N10  | Pd2  | N6   | 177.9(4)  | C55  | C59  | C58  | 107.9(14) |
| N10  | Pd2  | N7   | 98.6(4)   | C55  | C59  | C60  | 124.7(15) |
| C34  | Pd2  | N6   | 93.1(4)   | C58  | C59  | Yb2  | 75.2(8)   |
| C34  | Pd2  | N7   | 168.6(4)  | C58  | C59  | C60  | 126.1(14) |
| C34  | Pd2  | N10  | 88.3(5)   | C60  | C59  | Yb2  | 125.6(11) |
| C1   | N1   | Pd1  | 115.0(7)  | C66  | C65  | Yb2  | 76.1(7)   |
| C1   | N1   | C4   | 115.5(9)  | C66  | C65  | C69  | 107.7(12) |
| C4   | N1   | Pd1  | 129.1(7)  | C66  | C65  | C71  | 126.8(11) |
| C5   | N2   | Pd1  | 107.7(7)  | C69  | C65  | Yb2  | 74.9(7)   |
| C5   | N2   | C7   | 102.8(9)  | C69  | C65  | C71  | 124.8(12) |
| C7   | N2   | Pd1  | 147.8(8)  | C71  | C65  | Yb2  | 122.8(10) |
| C1   | N3   | Yb1  | 116.9(7)  | C65  | C66  | Yb2  | 72.7(7)   |
| C1   | N3   | C2   | 112.1(9)  | C65  | C66  | C67  | 107.6(10) |
| C2   | N3   | Yb1  | 129.0(7)  | C65  | C66  | C72  | 127.1(13) |
| C5   | N4   | Yb1  | 111.6(7)  | C67  | C66  | Yb2  | 74.5(7)   |
| C5   | N4   | C6   | 102.5(9)  | C67  | C66  | C72  | 123.4(13) |
| C6   | N4   | Yb1  | 145.8(7)  | C72  | C66  | Yb2  | 130.9(10) |
| C12  | N5   | Pd1  | 121.2(8)  | C66  | C67  | Yb2  | 73.5(8)   |
| C16  | N5   | Pd1  | 121.9(8)  | C66  | C67  | C73  | 123.3(11) |
| C16  | N5   | C12  | 116.9(10) | C68  | C67  | Yb2  | 73.6(7)   |
| C18  | N6   | Pd2  | 113.9(7)  | C68  | C67  | C66  | 107.7(11) |
| C18  | N6   | C19  | 115.7(8)  | C68  | C67  | C73  | 128.4(12) |
| C19  | N6   | Pd2  | 130.3(6)  | C73  | C67  | Yb2  | 125.3(9)  |
| C22  | N7   | Pd2  | 106.0(8)  | C67  | C68  | Yb2  | 75.3(7)   |
| C22  | N7   | C23  | 104.0(9)  | C67  | C68  | C74  | 125.3(11) |

| Atom | Atom | Atom | Angle/°   | Atom | Atom | Atom | Angle/°   |
|------|------|------|-----------|------|------|------|-----------|
| C23  | N7   | Pd2  | 146.9(7)  | C69  | C68  | Yb2  | 74.0(7)   |
| C18  | N8   | Yb2  | 116.2(7)  | C69  | C68  | C67  | 108.2(10) |
| C18  | N8   | C21  | 112.8(9)  | C69  | C68  | C74  | 126.1(10) |
| C21  | N8   | Yb2  | 128.6(7)  | C74  | C68  | Yb2  | 123.0(8)  |
| C22  | N9   | Yb2  | 113.3(7)  | C65  | C69  | Yb2  | 73.0(7)   |
| C22  | N9   | C24  | 101.4(9)  | C65  | C69  | C70  | 125.3(12) |
| C24  | N9   | Yb2  | 145.3(8)  | C68  | C69  | Yb2  | 74.8(7)   |
| C29  | N10  | Pd2  | 121.8(8)  | C68  | C69  | C65  | 108.8(10) |
| C33  | N10  | Pd2  | 121.6(8)  | C68  | C69  | C70  | 125.9(11) |
| C33  | N10  | C29  | 116.2(10) | C70  | C69  | Yb2  | 121.4(8)  |
| N1   | C1   | Yb1  | 168.9(7)  | C78  | O1   | C75  | 109(2)    |
| N1   | C1   | N3   | 128.5(9)  | C76  | C75  | O1   | 108(2)    |
| N1   | C1   | C5   | 116.0(10) | C75  | C76  | C77  | 101(2)    |
| N3   | C1   | Yb1  | 40.8(5)   | C78  | C77  | C76  | 105(2)    |
| N3   | C1   | C5   | 115.5(10) | C77  | C78  | O1   | 110(2)    |
| C5   | C1   | Yb1  | 74.8(6)   | C79  | O2   | C82  | 108.0(14) |
| C3   | C2   | N3   | 125.3(11) | O2   | C79  | C80  | 112.6(19) |
| C2   | C3   | C4   | 117.7(10) | C79  | C80  | C81  | 106.0(17) |
| N1   | C4   | C3   | 110.0(9)  | C80  | C81  | C82  | 104.0(16) |
| N1   | C4   | C19  | 111.8(9)  | O2   | C82  | C81  | 105.5(15) |

*Table S8. Bond Lengths for 4.*

| Atom | Atom            | Length/Å  | Atom | Atom | Length/Å |
|------|-----------------|-----------|------|------|----------|
| Sm1  | Pd1             | 2.9078(3) | C7   | C8   | 1.420(6) |
| Sm1  | N1              | 2.386(4)  | C7   | C12  | 1.498(7) |
| Sm1  | C1              | 2.861(4)  | C8   | C9   | 1.411(7) |
| Sm1  | C6              | 2.711(4)  | C8   | C13  | 1.514(6) |
| Sm1  | C7              | 2.710(5)  | C9   | C10  | 1.405(6) |
| Sm1  | C8              | 2.754(4)  | C9   | C14  | 1.507(6) |
| Sm1  | C9              | 2.746(4)  | C10  | C15  | 1.497(6) |
| Sm1  | C10             | 2.734(4)  | C16  | C17  | 1.403(6) |
| Sm1  | C16             | 2.693(4)  | C16  | C20  | 1.418(7) |
| Sm1  | C17             | 2.712(5)  | C16  | C21  | 1.513(7) |
| Sm1  | C18             | 2.743(4)  | C17  | C18  | 1.411(7) |
| Sm1  | C19             | 2.762(5)  | C17  | C22  | 1.520(6) |
| Sm1  | C20             | 2.707(4)  | C18  | C19  | 1.407(6) |
| Pd1  | C1              | 2.080(5)  | C18  | C23  | 1.500(7) |
| Pd1  | C1 <sup>1</sup> | 2.080(5)  | C19  | C20  | 1.399(7) |
| N1   | C1              | 1.348(6)  | C19  | C24  | 1.527(7) |
| N1   | C5              | 1.351(6)  | C20  | C25  | 1.508(6) |
| C1   | C2              | 1.431(6)  | C26  | C27  | 1.458(8) |
| C2   | C3              | 1.355(7)  | C27  | C28  | 1.378(7) |

| Atom | Atom | Length/Å | Atom | Atom | Length/Å |
|------|------|----------|------|------|----------|
| C3   | C4   | 1.391(8) | C27  | C32  | 1.389(7) |
| C4   | C5   | 1.369(6) | C28  | C29  | 1.381(8) |
| C6   | C7   | 1.422(6) | C29  | C30  | 1.372(8) |
| C6   | C10  | 1.417(6) | C30  | C31  | 1.346(8) |
| C6   | C11  | 1.528(6) | C31  | C32  | 1.362(8) |

<sup>1</sup>1-X,+Y,3/2-Z

*Table S9. Bond Angles for 4.*

| Atom | Atom | Atom | Angle/°    | Atom | Atom | Atom            | Angle/°   |
|------|------|------|------------|------|------|-----------------|-----------|
| N1   | Sm1  | Pd1  | 70.16(10)  | C1   | Pd1  | C1 <sup>1</sup> | 179.8(2)  |
| N1   | Sm1  | C1   | 27.95(13)  | C1   | N1   | Sm1             | 96.0(3)   |
| N1   | Sm1  | C6   | 78.94(13)  | C1   | N1   | C5              | 122.3(4)  |
| N1   | Sm1  | C7   | 87.61(14)  | C5   | N1   | Sm1             | 141.4(3)  |
| N1   | Sm1  | C8   | 117.65(14) | Pd1  | C1   | Sm1             | 70.07(12) |
| N1   | Sm1  | C9   | 128.12(13) | N1   | C1   | Sm1             | 56.0(2)   |
| N1   | Sm1  | C10  | 102.58(14) | N1   | C1   | Pd1             | 126.0(3)  |
| N1   | Sm1  | C16  | 113.17(14) | N1   | C1   | C2              | 115.1(4)  |
| N1   | Sm1  | C17  | 84.23(14)  | C2   | C1   | Sm1             | 170.0(4)  |
| N1   | Sm1  | C18  | 80.79(14)  | C2   | C1   | Pd1             | 118.9(4)  |
| N1   | Sm1  | C19  | 107.09(15) | C3   | C2   | C1              | 122.6(5)  |
| N1   | Sm1  | C20  | 129.78(14) | C2   | C3   | C4              | 120.2(5)  |
| C1   | Sm1  | Pd1  | 42.26(10)  | C5   | C4   | C3              | 116.4(5)  |
| C6   | Sm1  | Pd1  | 93.98(11)  | N1   | C5   | C4              | 123.4(5)  |
| C6   | Sm1  | C1   | 82.86(13)  | C7   | C6   | Sm1             | 74.7(3)   |
| C6   | Sm1  | C8   | 49.31(13)  | C7   | C6   | C11             | 125.0(5)  |
| C6   | Sm1  | C9   | 49.21(14)  | C10  | C6   | Sm1             | 75.8(3)   |
| C6   | Sm1  | C10  | 30.16(13)  | C10  | C6   | C7              | 108.9(4)  |
| C6   | Sm1  | C17  | 159.99(16) | C10  | C6   | C11             | 125.8(5)  |
| C6   | Sm1  | C18  | 134.53(16) | C11  | C6   | Sm1             | 121.1(3)  |
| C6   | Sm1  | C19  | 126.77(15) | C6   | C7   | Sm1             | 74.8(3)   |
| C7   | Sm1  | Pd1  | 124.16(11) | C6   | C7   | C12             | 127.2(4)  |
| C7   | Sm1  | C1   | 103.41(13) | C8   | C7   | Sm1             | 76.6(3)   |
| C7   | Sm1  | C6   | 30.42(14)  | C8   | C7   | C6              | 106.7(4)  |
| C7   | Sm1  | C8   | 30.11(13)  | C8   | C7   | C12             | 125.8(5)  |
| C7   | Sm1  | C9   | 49.74(14)  | C12  | C7   | Sm1             | 118.6(3)  |
| C7   | Sm1  | C10  | 50.20(15)  | C7   | C8   | Sm1             | 73.2(3)   |
| C7   | Sm1  | C17  | 138.96(16) | C7   | C8   | C13             | 124.6(5)  |
| C7   | Sm1  | C18  | 109.00(16) | C9   | C8   | Sm1             | 74.8(3)   |
| C7   | Sm1  | C19  | 96.36(15)  | C9   | C8   | C7              | 108.3(4)  |
| C8   | Sm1  | Pd1  | 133.79(10) | C9   | C8   | C13             | 125.7(4)  |
| C8   | Sm1  | C1   | 131.36(13) | C13  | C8   | Sm1             | 128.5(3)  |
| C8   | Sm1  | C19  | 85.38(14)  | C8   | C9   | Sm1             | 75.4(3)   |



| Atom | Atom | Atom | Angle/°    | Atom | Atom | Atom | Angle/°  |
|------|------|------|------------|------|------|------|----------|
| C9   | Sm1  | Pd1  | 107.07(11) | C8   | C9   | C14  | 124.7(4) |
| C9   | Sm1  | C1   | 124.73(13) | C10  | C9   | Sm1  | 74.7(3)  |
| C9   | Sm1  | C8   | 29.73(14)  | C10  | C9   | C8   | 108.8(4) |
| C9   | Sm1  | C19  | 105.84(14) | C10  | C9   | C14  | 126.0(5) |
| C10  | Sm1  | Pd1  | 84.65(10)  | C14  | C9   | Sm1  | 123.0(3) |
| C10  | Sm1  | C1   | 95.03(13)  | C6   | C10  | Sm1  | 74.0(3)  |
| C10  | Sm1  | C8   | 49.30(14)  | C6   | C10  | C15  | 126.4(4) |
| C10  | Sm1  | C9   | 29.70(13)  | C9   | C10  | Sm1  | 75.6(3)  |
| C10  | Sm1  | C18  | 158.09(16) | C9   | C10  | C6   | 107.3(4) |
| C10  | Sm1  | C19  | 133.83(14) | C9   | C10  | C15  | 125.8(5) |
| C16  | Sm1  | Pd1  | 92.55(11)  | C15  | C10  | Sm1  | 122.4(3) |
| C16  | Sm1  | C1   | 108.89(14) | C17  | C16  | Sm1  | 75.7(3)  |
| C16  | Sm1  | C6   | 167.66(14) | C17  | C16  | C20  | 108.0(5) |
| C16  | Sm1  | C7   | 142.80(15) | C17  | C16  | C21  | 124.9(5) |
| C16  | Sm1  | C8   | 119.50(14) | C20  | C16  | Sm1  | 75.3(3)  |
| C16  | Sm1  | C9   | 118.70(15) | C20  | C16  | C21  | 127.0(5) |
| C16  | Sm1  | C10  | 140.82(16) | C21  | C16  | Sm1  | 118.0(3) |
| C16  | Sm1  | C17  | 30.08(14)  | C16  | C17  | Sm1  | 74.2(3)  |
| C16  | Sm1  | C18  | 49.63(15)  | C16  | C17  | C18  | 108.4(4) |
| C16  | Sm1  | C19  | 49.16(15)  | C16  | C17  | C22  | 126.4(5) |
| C16  | Sm1  | C20  | 30.45(14)  | C18  | C17  | Sm1  | 76.3(3)  |
| C17  | Sm1  | Pd1  | 90.39(11)  | C18  | C17  | C22  | 125.0(5) |
| C17  | Sm1  | C1   | 87.35(13)  | C22  | C17  | Sm1  | 119.6(3) |
| C17  | Sm1  | C8   | 134.22(14) | C17  | C18  | Sm1  | 73.8(3)  |
| C17  | Sm1  | C9   | 146.62(14) | C17  | C18  | C23  | 125.8(5) |
| C17  | Sm1  | C10  | 169.58(16) | C19  | C18  | Sm1  | 75.9(3)  |
| C17  | Sm1  | C18  | 29.97(14)  | C19  | C18  | C17  | 107.2(4) |
| C17  | Sm1  | C19  | 48.95(14)  | C19  | C18  | C23  | 126.4(5) |
| C18  | Sm1  | Pd1  | 116.43(11) | C23  | C18  | Sm1  | 123.1(3) |
| C18  | Sm1  | C1   | 97.23(14)  | C18  | C19  | Sm1  | 74.5(3)  |
| C18  | Sm1  | C8   | 109.75(15) | C18  | C19  | C24  | 122.9(5) |
| C18  | Sm1  | C9   | 134.57(15) | C20  | C19  | Sm1  | 73.0(3)  |
| C18  | Sm1  | C19  | 29.61(13)  | C20  | C19  | C18  | 109.1(5) |
| C19  | Sm1  | Pd1  | 138.58(11) | C20  | C19  | C24  | 127.5(5) |
| C19  | Sm1  | C1   | 126.72(14) | C24  | C19  | Sm1  | 125.7(3) |
| C20  | Sm1  | Pd1  | 121.00(12) | C16  | C20  | Sm1  | 74.2(3)  |
| C20  | Sm1  | C1   | 136.82(14) | C16  | C20  | C25  | 125.4(5) |
| C20  | Sm1  | C6   | 139.22(15) | C19  | C20  | Sm1  | 77.4(3)  |
| C20  | Sm1  | C7   | 112.69(16) | C19  | C20  | C16  | 107.3(4) |
| C20  | Sm1  | C8   | 89.93(14)  | C19  | C20  | C25  | 126.7(5) |
| C20  | Sm1  | C9   | 97.12(14)  | C25  | C20  | Sm1  | 120.9(3) |
| C20  | Sm1  | C10  | 126.08(14) | C28  | C27  | C26  | 121.5(6) |
| C20  | Sm1  | C17  | 49.81(14)  | C28  | C27  | C32  | 118.5(6) |
| C20  | Sm1  | C18  | 49.58(14)  | C32  | C27  | C26  | 120.0(6) |

| Atom             | Atom | Atom             | Angle/°    | Atom | Atom | Atom | Angle/°  |
|------------------|------|------------------|------------|------|------|------|----------|
| C20              | Sm1  | C19              | 29.63(15)  | C27  | C28  | C29  | 120.9(5) |
| Sm1 <sup>1</sup> | Pd1  | Sm1              | 175.61(2)  | C30  | C29  | C28  | 119.3(6) |
| C1               | Pd1  | Sm1 <sup>1</sup> | 112.32(13) | C31  | C30  | C29  | 119.8(6) |
| C1 <sup>1</sup>  | Pd1  | Sm1              | 112.32(13) | C30  | C31  | C32  | 122.1(6) |
| C1 <sup>1</sup>  | Pd1  | Sm1 <sup>1</sup> | 67.67(13)  | C31  | C32  | C27  | 119.4(5) |
| C1               | Pd1  | Sm1              | 67.67(13)  |      |      |      |          |

<sup>1</sup>1-X,+Y,3/2-Z

**Table S10.** Bond Lengths for 5.

| Atom | Atom            | Length/Å    | Atom | Atom | Length/Å |
|------|-----------------|-------------|------|------|----------|
| Yb1  | Pd1             | 2.92441(15) | C7   | C8   | 1.416(5) |
| Yb1  | N1              | 2.275(3)    | C7   | C12  | 1.506(5) |
| Yb1  | C1              | 2.772(4)    | C8   | C9   | 1.423(5) |
| Yb1  | C6              | 2.612(3)    | C8   | C13  | 1.512(5) |
| Yb1  | C7              | 2.668(4)    | C9   | C10  | 1.414(5) |
| Yb1  | C8              | 2.643(4)    | C9   | C14  | 1.503(5) |
| Yb1  | C9              | 2.643(3)    | C10  | C15  | 1.502(5) |
| Yb1  | C10             | 2.620(3)    | C16  | C17  | 1.410(6) |
| Yb1  | C16             | 2.643(3)    | C16  | C20  | 1.420(5) |
| Yb1  | C17             | 2.655(3)    | C16  | C21  | 1.498(5) |
| Yb1  | C18             | 2.624(4)    | C17  | C18  | 1.423(5) |
| Yb1  | C19             | 2.604(3)    | C17  | C22  | 1.505(5) |
| Yb1  | C20             | 2.623(4)    | C18  | C19  | 1.414(6) |
| Pd1  | C1              | 2.079(4)    | C18  | C23  | 1.508(5) |
| Pd1  | C1 <sup>1</sup> | 2.079(4)    | C19  | C20  | 1.412(5) |
| N1   | C1              | 1.359(5)    | C19  | C24  | 1.515(5) |
| N1   | C5              | 1.352(5)    | C20  | C25  | 1.498(6) |
| C1   | C2              | 1.417(5)    | C26  | C27  | 1.388(7) |
| C2   | C3              | 1.379(6)    | C26  | C31  | 1.381(6) |
| C3   | C4              | 1.390(7)    | C26  | C32  | 1.487(8) |
| C4   | C5              | 1.368(6)    | C27  | C28  | 1.378(7) |
| C6   | C7              | 1.424(5)    | C28  | C29  | 1.369(7) |
| C6   | C10             | 1.424(5)    | C29  | C30  | 1.366(8) |
| C6   | C11             | 1.501(5)    | C30  | C31  | 1.397(7) |

<sup>1</sup>1-X,+Y,3/2-Z

**Table S11.** Bond Angles for 5.

| Atom | Atom | Atom | Angle/°    | Atom | Atom | Atom            | Angle/°    |
|------|------|------|------------|------|------|-----------------|------------|
| N1   | Yb1  | Pd1  | 71.84(8)   | C1   | Pd1  | C1 <sup>1</sup> | 178.90(18) |
| N1   | Yb1  | C1   | 29.18(11)  | C1   | N1   | Yb1             | 96.2(2)    |
| N1   | Yb1  | C6   | 87.95(11)  | C5   | N1   | Yb1             | 141.5(3)   |
| N1   | Yb1  | C7   | 119.09(11) | C5   | N1   | C1              | 122.2(3)   |
| N1   | Yb1  | C8   | 130.39(11) | Pd1  | C1   | Yb1             | 72.56(11)  |
| N1   | Yb1  | C9   | 103.17(11) | N1   | C1   | Yb1             | 54.66(18)  |
| N1   | Yb1  | C10  | 78.71(11)  | N1   | C1   | Pd1             | 127.1(3)   |
| N1   | Yb1  | C16  | 80.98(11)  | N1   | C1   | C2              | 116.0(3)   |
| N1   | Yb1  | C17  | 107.98(12) | C2   | C1   | Yb1             | 170.0(3)   |
| N1   | Yb1  | C18  | 131.99(11) | C2   | C1   | Pd1             | 116.9(3)   |
| N1   | Yb1  | C19  | 114.75(12) | C3   | C2   | C1              | 121.9(4)   |
| N1   | Yb1  | C20  | 84.62(11)  | C2   | C3   | C4              | 119.6(4)   |
| C1   | Yb1  | Pd1  | 42.70(8)   | C5   | C4   | C3              | 117.5(4)   |
| C6   | Yb1  | Pd1  | 125.07(8)  | N1   | C5   | C4              | 122.8(4)   |
| C6   | Yb1  | C1   | 104.63(11) | C7   | C6   | Yb1             | 76.5(2)    |
| C6   | Yb1  | C7   | 31.26(11)  | C7   | C6   | C10             | 108.0(3)   |
| C6   | Yb1  | C8   | 51.76(11)  | C7   | C6   | C11             | 125.4(3)   |
| C6   | Yb1  | C9   | 51.80(11)  | C10  | C6   | Yb1             | 74.5(2)    |
| C6   | Yb1  | C10  | 31.59(11)  | C10  | C6   | C11             | 126.4(3)   |
| C6   | Yb1  | C16  | 110.03(12) | C11  | C6   | Yb1             | 119.0(2)   |
| C6   | Yb1  | C17  | 95.86(12)  | C6   | C7   | Yb1             | 72.2(2)    |
| C6   | Yb1  | C18  | 112.61(12) | C6   | C7   | C12             | 125.3(3)   |
| C6   | Yb1  | C20  | 141.30(12) | C8   | C7   | Yb1             | 73.6(2)    |
| C7   | Yb1  | Pd1  | 134.10(8)  | C8   | C7   | C6              | 107.8(3)   |
| C7   | Yb1  | C1   | 133.61(11) | C8   | C7   | C12             | 125.2(4)   |
| C8   | Yb1  | Pd1  | 105.82(8)  | C12  | C7   | Yb1             | 131.7(3)   |
| C8   | Yb1  | C1   | 125.89(11) | C7   | C8   | Yb1             | 75.5(2)    |
| C8   | Yb1  | C7   | 30.93(11)  | C7   | C8   | C9              | 108.2(3)   |
| C8   | Yb1  | C9   | 31.23(11)  | C7   | C8   | C13             | 125.0(3)   |
| C8   | Yb1  | C17  | 104.22(12) | C9   | C8   | Yb1             | 74.4(2)    |
| C9   | Yb1  | Pd1  | 83.18(8)   | C9   | C8   | C13             | 125.5(3)   |
| C9   | Yb1  | C1   | 94.69(11)  | C13  | C8   | Yb1             | 126.6(3)   |
| C9   | Yb1  | C7   | 51.31(11)  | C8   | C9   | Yb1             | 74.4(2)    |
| C9   | Yb1  | C17  | 133.80(12) | C8   | C9   | C14             | 124.7(3)   |
| C10  | Yb1  | Pd1  | 93.59(8)   | C10  | C9   | Yb1             | 73.52(19)  |
| C10  | Yb1  | C1   | 82.66(11)  | C10  | C9   | C8              | 108.1(3)   |
| C10  | Yb1  | C7   | 51.63(11)  | C10  | C9   | C14             | 126.8(4)   |
| C10  | Yb1  | C8   | 51.72(11)  | C14  | C9   | Yb1             | 124.2(2)   |
| C10  | Yb1  | C9   | 31.16(12)  | C6   | C10  | Yb1             | 73.9(2)    |
| C10  | Yb1  | C16  | 136.31(12) | C6   | C10  | C15             | 126.0(3)   |
| C10  | Yb1  | C17  | 127.45(12) | C9   | C10  | Yb1             | 75.3(2)    |
| C10  | Yb1  | C18  | 139.37(12) | C9   | C10  | C6              | 108.0(3)   |
| C10  | Yb1  | C20  | 161.71(12) | C9   | C10  | C15             | 125.5(3)   |

| Atom            | Atom | Atom             | Angle/°     | Atom | Atom | Atom | Angle/°  |
|-----------------|------|------------------|-------------|------|------|------|----------|
| C16             | Yb1  | Pd1              | 115.99(9)   | C15  | C10  | Yb1  | 123.1(2) |
| C16             | Yb1  | C1               | 97.49(11)   | C17  | C16  | Yb1  | 75.0(2)  |
| C16             | Yb1  | C7               | 109.85(12)  | C17  | C16  | C20  | 108.1(3) |
| C16             | Yb1  | C8               | 134.70(12)  | C17  | C16  | C21  | 126.2(4) |
| C16             | Yb1  | C9               | 160.50(12)  | C20  | C16  | Yb1  | 73.6(2)  |
| C16             | Yb1  | C17              | 30.87(12)   | C20  | C16  | C21  | 125.0(4) |
| C17             | Yb1  | Pd1              | 138.67(9)   | C21  | C16  | Yb1  | 124.7(3) |
| C17             | Yb1  | C1               | 128.22(11)  | C16  | C17  | Yb1  | 74.1(2)  |
| C17             | Yb1  | C7               | 83.56(12)   | C16  | C17  | C18  | 108.0(3) |
| C18             | Yb1  | Pd1              | 118.89(9)   | C16  | C17  | C22  | 123.5(4) |
| C18             | Yb1  | C1               | 137.66(11)  | C18  | C17  | Yb1  | 73.2(2)  |
| C18             | Yb1  | C7               | 87.77(12)   | C18  | C17  | C22  | 127.3(4) |
| C18             | Yb1  | C8               | 93.67(12)   | C22  | C17  | Yb1  | 128.6(3) |
| C18             | Yb1  | C9               | 123.91(12)  | C17  | C18  | Yb1  | 75.6(2)  |
| C18             | Yb1  | C16              | 51.58(12)   | C17  | C18  | C23  | 126.8(4) |
| C18             | Yb1  | C17              | 31.28(12)   | C19  | C18  | Yb1  | 73.5(2)  |
| C19             | Yb1  | Pd1              | 89.80(9)    | C19  | C18  | C17  | 107.7(3) |
| C19             | Yb1  | C1               | 108.40(11)  | C19  | C18  | C23  | 124.8(4) |
| C19             | Yb1  | C6               | 143.86(12)  | C23  | C18  | Yb1  | 124.1(3) |
| C19             | Yb1  | C7               | 117.98(12)  | C18  | C19  | Yb1  | 75.1(2)  |
| C19             | Yb1  | C8               | 114.78(12)  | C18  | C19  | C24  | 125.6(4) |
| C19             | Yb1  | C9               | 137.01(12)  | C20  | C19  | Yb1  | 75.1(2)  |
| C19             | Yb1  | C10              | 166.48(12)  | C20  | C19  | C18  | 108.3(3) |
| C19             | Yb1  | C16              | 51.72(12)   | C20  | C19  | C24  | 125.7(4) |
| C19             | Yb1  | C17              | 51.66(12)   | C24  | C19  | Yb1  | 121.4(2) |
| C19             | Yb1  | C18              | 31.39(12)   | C16  | C20  | Yb1  | 75.1(2)  |
| C19             | Yb1  | C20              | 31.34(12)   | C16  | C20  | C25  | 124.9(4) |
| C20             | Yb1  | Pd1              | 88.27(8)    | C19  | C20  | Yb1  | 73.6(2)  |
| C20             | Yb1  | C1               | 86.47(11)   | C19  | C20  | C16  | 107.9(3) |
| C20             | Yb1  | C7               | 134.67(12)  | C19  | C20  | C25  | 127.0(4) |
| C20             | Yb1  | C8               | 144.63(12)  | C25  | C20  | Yb1  | 121.6(3) |
| C20             | Yb1  | C9               | 165.92(12)  | C27  | C26  | C32  | 120.8(5) |
| C20             | Yb1  | C16              | 31.28(12)   | C31  | C26  | C27  | 119.2(5) |
| C20             | Yb1  | C17              | 51.45(12)   | C31  | C26  | C32  | 120.0(5) |
| C20             | Yb1  | C18              | 51.77(12)   | C28  | C27  | C26  | 119.8(4) |
| Yb1             | Pd1  | Yb1 <sup>1</sup> | 177.247(15) | C29  | C28  | C27  | 121.3(5) |
| C1              | Pd1  | Yb1 <sup>1</sup> | 115.29(10)  | C30  | C29  | C28  | 119.5(5) |
| C1 <sup>1</sup> | Pd1  | Yb1 <sup>1</sup> | 64.74(10)   | C29  | C30  | C31  | 120.3(5) |
| C1              | Pd1  | Yb1              | 64.74(10)   | C26  | C31  | C30  | 120.0(5) |
| C1 <sup>1</sup> | Pd1  | Yb1              | 115.29(10)  |      |      |      |          |

<sup>1</sup>1-X,+Y,3/2-Z

**Table S12.** Bond Lengths for 6.

| Atom | Atom | Length/Å  | Atom | Atom | Length/Å |
|------|------|-----------|------|------|----------|
| Yb1  | Pd1  | 2.8766(3) | C5   | C6   | 1.408(3) |
| Yb1  | C1   | 2.559(2)  | C5   | C10  | 1.497(4) |
| Yb1  | C2   | 2.552(2)  | C6   | C7   | 1.419(3) |
| Yb1  | C13  | 2.622(2)  | C6   | C11  | 1.492(4) |
| Yb1  | C14  | 2.626(2)  | C7   | C12  | 1.496(3) |
| Yb1  | C15  | 2.629(2)  | C13  | C14  | 1.426(4) |
| Yb1  | C16  | 2.638(2)  | C13  | C17  | 1.414(3) |
| Yb1  | C17  | 2.627(2)  | C13  | C18  | 1.501(3) |
| Yb1  | C23  | 2.606(2)  | C14  | C15  | 1.418(4) |
| Yb1  | C24  | 2.611(2)  | C14  | C19  | 1.496(4) |
| Yb1  | C25  | 2.615(2)  | C15  | C16  | 1.426(3) |
| Yb1  | C26  | 2.639(2)  | C15  | C20  | 1.503(3) |
| Yb1  | C27  | 2.637(2)  | C16  | C17  | 1.414(3) |
| Pd1  | C1   | 2.123(2)  | C16  | C21  | 1.499(3) |
| Pd1  | C2   | 2.123(2)  | C17  | C22  | 1.505(3) |
| Pd1  | C3   | 2.425(2)  | C23  | C24  | 1.420(4) |
| Pd1  | C4   | 2.413(2)  | C23  | C27  | 1.416(4) |
| Pd1  | C5   | 2.303(2)  | C23  | C28  | 1.499(4) |
| Pd1  | C6   | 2.352(2)  | C24  | C25  | 1.413(3) |
| Pd1  | C7   | 2.271(2)  | C24  | C29  | 1.502(4) |
| C3   | C4   | 1.382(4)  | C25  | C26  | 1.415(3) |
| C3   | C7   | 1.457(3)  | C25  | C30  | 1.503(4) |
| C3   | C8   | 1.492(4)  | C26  | C27  | 1.415(3) |
| C4   | C5   | 1.467(4)  | C26  | C31  | 1.498(3) |
| C4   | C9   | 1.497(4)  | C27  | C32  | 1.496(4) |

**Table S13.** Bond Angles for 6.

| Atom | Atom | Atom | Angle/°   | Atom | Atom | Atom | Angle/°    |
|------|------|------|-----------|------|------|------|------------|
| C1   | Yb1  | C13  | 84.89(8)  | C7   | Pd1  | C6   | 35.70(8)   |
| C1   | Yb1  | C14  | 115.72(8) | Pd1  | C1   | Yb1  | 75.18(7)   |
| C1   | Yb1  | C15  | 130.91(7) | Pd1  | C2   | Yb1  | 75.31(7)   |
| C1   | Yb1  | C16  | 105.68(7) | C4   | C3   | Pd1  | 72.91(13)  |
| C1   | Yb1  | C17  | 79.39(7)  | C4   | C3   | C7   | 107.2(2)   |
| C1   | Yb1  | C23  | 91.97(8)  | C4   | C3   | C8   | 128.9(3)   |
| C1   | Yb1  | C24  | 123.56(8) | C7   | C3   | Pd1  | 66.24(12)  |
| C1   | Yb1  | C25  | 130.48(8) | C7   | C3   | C8   | 123.9(3)   |
| C1   | Yb1  | C26  | 101.21(8) | C8   | C3   | Pd1  | 124.14(18) |
| C1   | Yb1  | C27  | 79.56(8)  | C3   | C4   | Pd1  | 73.90(14)  |
| C2   | Yb1  | C1   | 90.78(7)  | C3   | C4   | C5   | 107.9(2)   |
| C2   | Yb1  | C13  | 85.06(7)  | C3   | C4   | C9   | 127.9(3)   |
| C2   | Yb1  | C14  | 79.02(7)  | C5   | C4   | Pd1  | 67.85(12)  |

| Atom | Atom | Atom | Angle/°   | Atom | Atom | Atom | Angle/°    |
|------|------|------|-----------|------|------|------|------------|
| C2   | Yb1  | C15  | 105.42(7) | C5   | C4   | C9   | 124.2(3)   |
| C2   | Yb1  | C16  | 130.71(7) | C9   | C4   | Pd1  | 124.30(18) |
| C2   | Yb1  | C17  | 115.73(7) | C4   | C5   | Pd1  | 76.01(14)  |
| C2   | Yb1  | C23  | 130.22(7) | C4   | C5   | C10  | 124.1(3)   |
| C2   | Yb1  | C24  | 121.86(8) | C6   | C5   | Pd1  | 74.30(13)  |
| C2   | Yb1  | C25  | 90.50(7)  | C6   | C5   | C4   | 108.5(2)   |
| C2   | Yb1  | C26  | 78.97(7)  | C6   | C5   | C10  | 126.5(3)   |
| C2   | Yb1  | C27  | 101.33(8) | C10  | C5   | Pd1  | 124.01(17) |
| C13  | Yb1  | C14  | 31.53(8)  | C5   | C6   | Pd1  | 70.51(13)  |
| C13  | Yb1  | C15  | 51.95(7)  | C5   | C6   | C7   | 106.4(2)   |
| C13  | Yb1  | C16  | 51.83(7)  | C5   | C6   | C11  | 127.3(2)   |
| C13  | Yb1  | C17  | 31.26(8)  | C7   | C6   | Pd1  | 69.03(12)  |
| C13  | Yb1  | C26  | 162.93(7) | C7   | C6   | C11  | 126.3(2)   |
| C13  | Yb1  | C27  | 163.22(8) | C11  | C6   | Pd1  | 124.03(17) |
| C14  | Yb1  | C15  | 31.32(8)  | C3   | C7   | Pd1  | 77.82(13)  |
| C14  | Yb1  | C16  | 51.86(7)  | C3   | C7   | C12  | 124.0(2)   |
| C14  | Yb1  | C17  | 51.76(8)  | C6   | C7   | Pd1  | 75.27(13)  |
| C14  | Yb1  | C26  | 136.85(8) | C6   | C7   | C3   | 109.0(2)   |
| C14  | Yb1  | C27  | 164.71(8) | C6   | C7   | C12  | 125.4(2)   |
| C15  | Yb1  | C16  | 31.41(7)  | C12  | C7   | Pd1  | 125.01(17) |
| C15  | Yb1  | C26  | 127.03(7) | C14  | C13  | Yb1  | 74.37(13)  |
| C15  | Yb1  | C27  | 138.09(8) | C14  | C13  | C18  | 125.5(2)   |
| C16  | Yb1  | C26  | 138.55(7) | C17  | C13  | Yb1  | 74.58(12)  |
| C17  | Yb1  | C15  | 51.71(7)  | C17  | C13  | C14  | 107.7(2)   |
| C17  | Yb1  | C16  | 31.16(7)  | C17  | C13  | C18  | 126.6(2)   |
| C17  | Yb1  | C26  | 165.29(7) | C18  | C13  | Yb1  | 121.52(16) |
| C17  | Yb1  | C27  | 137.24(8) | C13  | C14  | Yb1  | 74.10(12)  |
| C23  | Yb1  | C13  | 144.67(8) | C13  | C14  | C19  | 127.5(2)   |
| C23  | Yb1  | C14  | 140.95(8) | C15  | C14  | Yb1  | 74.49(13)  |
| C23  | Yb1  | C15  | 109.67(8) | C15  | C14  | C13  | 108.0(2)   |
| C23  | Yb1  | C16  | 95.97(8)  | C15  | C14  | C19  | 123.9(2)   |
| C23  | Yb1  | C17  | 113.61(8) | C19  | C14  | Yb1  | 124.83(16) |
| C23  | Yb1  | C24  | 31.58(8)  | C14  | C15  | Yb1  | 74.19(13)  |
| C23  | Yb1  | C25  | 52.17(7)  | C14  | C15  | C16  | 108.0(2)   |
| C23  | Yb1  | C26  | 51.79(7)  | C14  | C15  | C20  | 123.9(2)   |
| C23  | Yb1  | C27  | 31.34(8)  | C16  | C15  | Yb1  | 74.61(12)  |
| C24  | Yb1  | C13  | 136.85(8) | C16  | C15  | C20  | 127.3(2)   |
| C24  | Yb1  | C14  | 114.96(8) | C20  | C15  | Yb1  | 125.20(16) |
| C24  | Yb1  | C15  | 86.59(8)  | C15  | C16  | Yb1  | 73.97(12)  |
| C24  | Yb1  | C16  | 87.10(7)  | C15  | C16  | C21  | 127.4(2)   |
| C24  | Yb1  | C17  | 115.76(8) | C17  | C16  | Yb1  | 74.02(12)  |
| C24  | Yb1  | C25  | 31.37(8)  | C17  | C16  | C15  | 107.6(2)   |
| C24  | Yb1  | C26  | 51.60(7)  | C17  | C16  | C21  | 123.8(2)   |
| C24  | Yb1  | C27  | 51.73(8)  | C21  | C16  | Yb1  | 127.46(16) |

| Atom | Atom | Atom | Angle/°    | Atom | Atom | Atom | Angle/°    |
|------|------|------|------------|------|------|------|------------|
| C25  | Yb1  | C13  | 144.47(8)  | C13  | C17  | Yb1  | 74.16(12)  |
| C25  | Yb1  | C14  | 113.08(8)  | C13  | C17  | C22  | 127.0(2)   |
| C25  | Yb1  | C15  | 96.06(7)   | C16  | C17  | Yb1  | 74.82(12)  |
| C25  | Yb1  | C16  | 110.43(7)  | C16  | C17  | C13  | 108.7(2)   |
| C25  | Yb1  | C17  | 141.58(8)  | C16  | C17  | C22  | 123.5(2)   |
| C25  | Yb1  | C26  | 31.25(8)   | C22  | C17  | Yb1  | 125.00(16) |
| C25  | Yb1  | C27  | 51.76(8)   | C24  | C23  | Yb1  | 74.42(13)  |
| C27  | Yb1  | C16  | 126.96(8)  | C24  | C23  | C28  | 126.1(3)   |
| C27  | Yb1  | C26  | 31.10(8)   | C27  | C23  | Yb1  | 75.56(13)  |
| C1   | Pd1  | Yb1  | 59.30(7)   | C27  | C23  | C24  | 107.7(2)   |
| C1   | Pd1  | C3   | 102.60(9)  | C27  | C23  | C28  | 125.5(3)   |
| C1   | Pd1  | C4   | 134.91(10) | C28  | C23  | Yb1  | 123.55(17) |
| C1   | Pd1  | C5   | 149.06(9)  | C23  | C24  | Yb1  | 74.00(13)  |
| C1   | Pd1  | C6   | 115.20(9)  | C23  | C24  | C29  | 124.3(3)   |
| C1   | Pd1  | C7   | 90.66(9)   | C25  | C24  | Yb1  | 74.47(13)  |
| C2   | Pd1  | Yb1  | 59.13(6)   | C25  | C24  | C23  | 108.3(2)   |
| C2   | Pd1  | C1   | 117.93(9)  | C25  | C24  | C29  | 126.0(3)   |
| C2   | Pd1  | C3   | 126.26(9)  | C29  | C24  | Yb1  | 128.33(17) |
| C2   | Pd1  | C4   | 96.28(9)   | C24  | C25  | Yb1  | 74.16(13)  |
| C2   | Pd1  | C5   | 92.53(9)   | C24  | C25  | C26  | 107.8(2)   |
| C2   | Pd1  | C6   | 121.83(9)  | C24  | C25  | C30  | 127.6(2)   |
| C2   | Pd1  | C7   | 151.33(9)  | C26  | C25  | Yb1  | 75.33(13)  |
| C3   | Pd1  | Yb1  | 148.13(6)  | C26  | C25  | C30  | 124.2(2)   |
| C4   | Pd1  | Yb1  | 147.66(6)  | C30  | C25  | Yb1  | 121.96(16) |
| C4   | Pd1  | C3   | 33.19(9)   | C25  | C26  | Yb1  | 73.43(12)  |
| C5   | Pd1  | Yb1  | 148.86(6)  | C25  | C26  | C31  | 125.6(2)   |
| C5   | Pd1  | C3   | 58.24(9)   | C27  | C26  | Yb1  | 74.37(13)  |
| C5   | Pd1  | C4   | 36.14(10)  | C27  | C26  | C25  | 108.2(2)   |
| C5   | Pd1  | C6   | 35.19(9)   | C27  | C26  | C31  | 125.6(2)   |
| C6   | Pd1  | Yb1  | 150.76(6)  | C31  | C26  | Yb1  | 124.67(16) |
| C6   | Pd1  | C3   | 58.66(9)   | C23  | C27  | Yb1  | 73.10(13)  |
| C6   | Pd1  | C4   | 58.63(9)   | C23  | C27  | C32  | 126.3(3)   |
| C7   | Pd1  | Yb1  | 149.46(6)  | C26  | C27  | Yb1  | 74.53(12)  |
| C7   | Pd1  | C3   | 35.95(8)   | C26  | C27  | C23  | 108.0(2)   |
| C7   | Pd1  | C4   | 58.30(8)   | C26  | C27  | C32  | 125.2(3)   |
| C7   | Pd1  | C5   | 59.32(8)   | C32  | C27  | Yb1  | 124.45(17) |

**Table S14.** Main distances (in Å) and angles (in °) in the compound **1**. “pym” and “imid” designate the pyrimidine and the 2-(benzimidazol-2-yl) moieties on the ligand, respectively.

| Atoms                        | Av. Values (Å or °) |
|------------------------------|---------------------|
| Pd-Me                        | 2.021(3)            |
| Pd-N <sub>py</sub>           | 2.041(2)            |
| Pd-N <sub>pym</sub>          | 2.176(2)            |
| Pd-N <sub>imid</sub>         | 2.035(2)            |
| Ligand plane <sup>^</sup> py | 60.68°              |

**Table S15.** Main distances (in Å) in the compounds **2** and **3**. “pym” and “imid” designate the pyrimidine and the 2-(benzimidazol-2-yl) moieties on the ligand, respectively.

| Atoms                                | Av. Values (Å) |           |
|--------------------------------------|----------------|-----------|
|                                      | 2              | 3         |
| Yb <sub>1</sub> -N <sub>pym</sub>    | 2.317(5)       | 2.328(9)  |
| Yb <sub>2</sub> -N <sub>pym</sub>    | 2.318(5)       | 2.321(8)  |
| Yb <sub>1</sub> -N <sub>imid</sub>   | 2.353(5)       | 2.365(10) |
| Yb <sub>2</sub> -N <sub>imid</sub>   | 2.324(5)       | 2.321(10) |
| Yb <sub>1</sub> – Cp* <sub>ctr</sub> | 2.319          | 2.337     |
| Yb <sub>2</sub> – Cp* <sub>ctr</sub> | 2.336          | 2.334     |
| Pd <sub>1</sub> -N <sub>pym</sub>    | 2.151(5)       | 2.039(9)  |
| Pd <sub>2</sub> -N <sub>pym</sub>    | 2.175(5)       | 2.045(8)  |
| Pd <sub>1</sub> -N <sub>imid</sub>   | 2.035(4)       | 2.192(9)  |
| Pd <sub>2</sub> -N <sub>imid</sub>   | 2.030(5)       | 2.182(10) |
| Pd <sub>1</sub> -N <sub>py</sub>     | 2.027(5)       | 2.029(10) |
| Pd <sub>2</sub> -N <sub>py</sub>     | 2.026(5)       | 2.014(9)  |
| Pd <sub>1</sub> -C <sub>Me</sub>     | 2.032(6)       | 2.013(11) |
| Pd <sub>2</sub> -C <sub>Me</sub>     | 2.022(6)       | 2.000(12) |

**Table S16.** Main distances (in Å) and angles (in °) in the compounds **4** and **5**.

| Atoms                                               | Av. Values (Å or °) |           |
|-----------------------------------------------------|---------------------|-----------|
|                                                     | 4 (Sm)              | 5 (Yb)    |
| Ln-Pd                                               | 2.9078(3)           | 2.9244(2) |
| Ln-N <sub>pyridyl</sub>                             | 2.386(4)            | 2.275(3)  |
| Ln-C <sub>pyridyl</sub>                             | 2.861(4)            | 2.772(4)  |
| Ln – Cp* <sub>ctr</sub>                             | 2.449               | 2.341     |
| Pd-C <sub>pyridyl</sub>                             | 2.080(5)            | 2.079(4)  |
| <(C <sub>pyridyl1</sub> -Pd-C <sub>pyridyl2</sub> ) | 178.87°             | 179.72°   |
| <(Cp* <sub>1 ctr</sub> -Ln- Cp* <sub>2 ctr</sub> )  | 134.70°             | 134.52°   |



**Table S17.** Main distances (in Å) in the compound **6**.

| <b>Atoms</b>                | <b>Av. Values (Å)</b> |
|-----------------------------|-----------------------|
| Yb-Pd                       | 2.8766(3)             |
| Pd-Me (avg)                 | 2.123(2)              |
| Yb-Me (avg)                 | 2.556(2)              |
| Yb-H (avg)                  | 2.206                 |
| Pd-Cp* <sub>ctr</sub>       | 2.017                 |
| Yb-Cp* <sub>ctr</sub> (avg) | 2.332                 |

## V. Theoretical calculations

DFT calculations were mainly done using the ORCA 4.2.1 software<sup>10</sup>. The geometry optimization calculations were performed with the “Tight” convergence criterion using the PBE functional and the scalar relativistic ZORA Hamiltonian.<sup>11</sup> The ZORA-def2-TZVP basis set<sup>12</sup> was used for the geometry optimization calculations of **1** and for the single-point energy calculations. The ZORA-def2-SVP basis set<sup>12</sup> was used for main group elements (C, H, N) for the geometry optimization calculations of the lanthanide-bearing complexes. SARC/J auxiliary basis sets for Coulomb fitting were used in all cases.<sup>13–15</sup> Dispersion corrections were added to the functional used in the D3 framework proposed by Grimme with the addition of the Becke–Johnson damping (D3BJ) in all cases.<sup>16,17</sup> Frequencies were calculated (analytically for the precursors and numerically for the complexes containing lanthanides) to ensure these structures corresponded to energy minima. Single-point energy calculations starting from PBE optimized geometries were then performed in the gas phase using the PBE, PBE0<sup>18</sup>, TPSSH<sup>19,20</sup> and  $\omega$ B97X-D3<sup>21</sup> functionals associated with the D3BJ dispersion corrections.

The transition state calculations were performed at the DFT level using the ORCA software. The transition state was confirmed by the presence of one imaginary frequency of high numeric value.

Complete active space self-consistent field (CASSCF) calculations were performed using the OpenMolcas 18.09 software,<sup>22,23</sup> using a DKH2 Hamiltonian to account for relativistic effects and ANO-RCC-VDZP basis sets for all elements.<sup>24</sup> The Cholesky decomposition framework<sup>25</sup> was also used to accelerate the calculation of the two-electron integrals.

All quantum chemical topological analyses<sup>26,27</sup> were performed with the Multiwfn code<sup>28</sup> by analyzing the electron density generated from the Orca code. The analyses of both covalent and non-covalent interactions were calculated based on the Density Overlap Regions Indicator (DORI).<sup>29</sup> Calculations of bond critical points in the quantum theory of atoms in molecule (QTAIM) framework were performed<sup>30,31</sup> associated to the computation of several descriptors, such as the electron density  $\rho(r)$ , the energy density  $H(r)$ , and the Laplacian of the electron density to characterize the bonding.<sup>32</sup> Then, the electron localization function (ELF) was calculated<sup>33</sup> to analyze the valence basins.

The ADF program package<sup>34</sup> was used for molecular orbital and energy decomposition

## 1. Geometry optimisations and electronic structure

### a) Compound 1

**Table S18.** Main distances (in Å) for the compound 1, as observed in the crystal structure and in the DFT optimized geometry with several different density functionals. "pym" and "imid" designate the pyrimidine and the 2-(benzimidazol-2-yl) moieties on the ligand, respectively.

| Distance \ source    | XRD structure | PBE-D3 | $\omega$ B97X-D3 | PBE0-D3 |
|----------------------|---------------|--------|------------------|---------|
| Pd-Me                | 2.022(3)      | 2.035  | 2.008            | 2.008   |
| Pd-N <sub>py</sub>   | 2.040(2)      | 2.041  | 2.086            | 2.049   |
| Pd-N <sub>pym</sub>  | 2.176(2)      | 2.162  | 2.203            | 2.166   |
| Pd-N <sub>imid</sub> | 2.034(2)      | 2.020  | 2.019            | 2.005   |

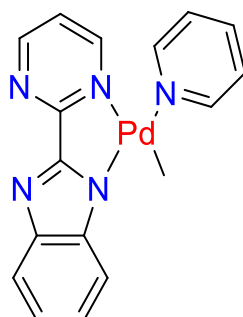

**Table S19.** Orbital energies of 1 after single point energy calculation using geometry optimized at the DFT/PBE-D3 level of theory using several different density functionals.

| Calculation type / Orbital energy (eV) | PBE-D3 | PBE0-D3 | TPSSH-D3 | $\omega$ B97X-D3 |
|----------------------------------------|--------|---------|----------|------------------|
| HOMO-2                                 | -5.14  | -6.42   | -5.62    | -8.56            |
| HOMO-1                                 | -4.95  | -5.67   | -5.17    | -7.39            |
| HOMO                                   | -4.68  | -5.55   | -4.98    | -7.37            |
| LUMO                                   | -3.01  | -2.22   | -2.56    | -0.33            |
| LUMO+1                                 | -2.57  | -1.78   | -2.11    | 0.003            |
| LUMO+2                                 | -2.51  | -1.67   | -2.02    | 0.23             |
| HOMO-LUMO gap                          | 1.66   | 3.34    | 2.41     | 7.07             |
| HOMO-LUMO gap (kcal/mol)               | 38.34  | 76.92   | 55.63    | 163.09           |
| LUMO-LUMO+1 gap (kcal/mol)             | 10.25  | 10.10   | 10.44    | 7.56             |

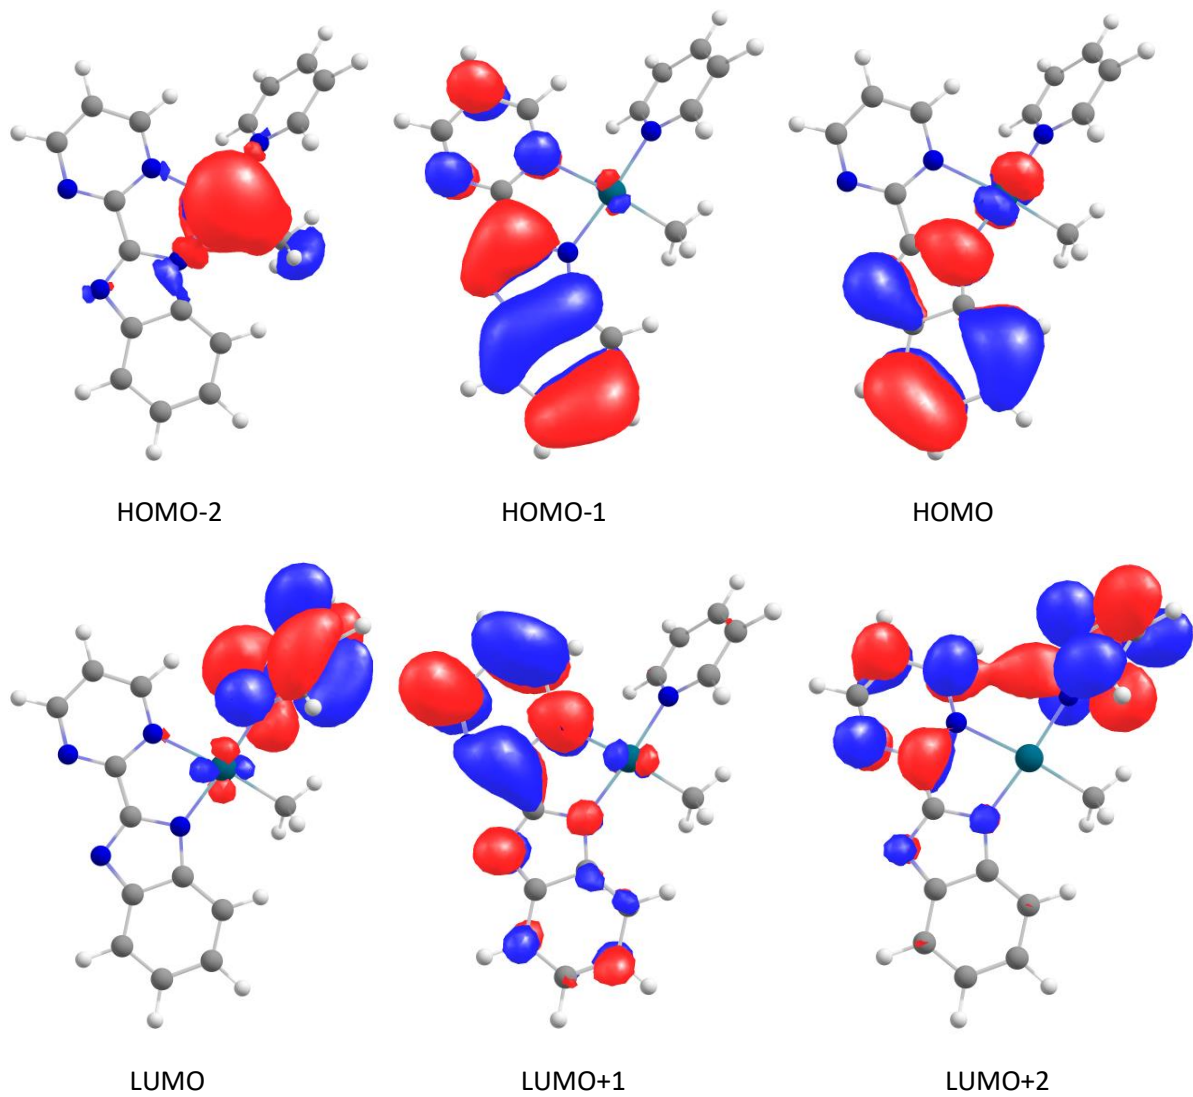

**Figure S37.** Preview of main orbitals (isocontour value = 0.3) of **1**, following single-point energy calculation using TPSSH-D3 density functional. The shape of the main orbitals is invariant of the functional used.

## b) Compound 4

### 1) DFT calculations

**Table S20** : Main distances (in Å) and angles (in °), as observed in the crystal structure and in the DFT optimized geometries using the PBE-D3 density functional.

| Distance \ source                                              | XRD structure | PBE-D3  |
|----------------------------------------------------------------|---------------|---------|
| Sm <sub>1</sub> -Pd                                            | 2.908(1)      | 2.924   |
| Sm <sub>2</sub> -Pd                                            | 2.908(1)      | 2.876   |
| Sm <sub>1</sub> -N <sub>pyridyl</sub>                          | 2.386(3)      | 2.428   |
| Sm <sub>2</sub> -N <sub>pyridyl</sub>                          | 2.386(3)      | 2.418   |
| Sm <sub>1</sub> -C <sub>pyridyl</sub>                          | 2.861(4)      | 2.952   |
| Sm <sub>2</sub> -C <sub>pyridyl</sub>                          | 2.861(4)      | 2.907   |
| Sm <sub>1</sub> – Cp* <sub>1</sub> ctr                         | 2.452         | 2.465   |
| Sm <sub>1</sub> – Cp* <sub>2</sub> ctr                         | 2.446         | 2.456   |
| Sm <sub>2</sub> – Cp* <sub>1</sub> ctr                         | 2.452         | 2.455   |
| Sm <sub>2</sub> – Cp* <sub>2</sub> ctr                         | 2.446         | 2.456   |
| Pd-C <sub>pyridyl1</sub>                                       | 2.081(4)      | 2.075   |
| Pd-C <sub>pyridyl2</sub>                                       | 2.081(4)      | 2.093   |
| <(C <sub>pyridyl1</sub> -Pd-C <sub>pyridyl2</sub> )            | 179.8(2)°     | 177.39° |
| <(Cp* <sub>1</sub> ctr -Sm <sub>1</sub> -Cp* <sub>2</sub> ctr) | 134.52°       | 135.09° |
| <(Cp* <sub>1</sub> ctr -Sm <sub>2</sub> -Cp* <sub>2</sub> ctr) | 134.52°       | 131.87° |

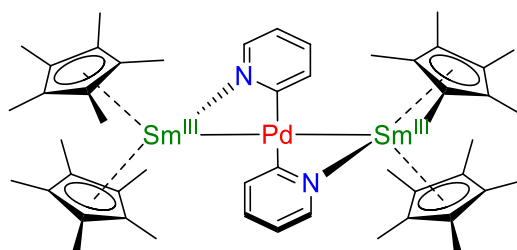

**Table S21.** Preview of main alpha orbitals of **4** (isocontour value = 0.3), following single point energy calculation using several different density functionals

| Functional / Orbital | PBE-D3                                                                              | PBE0-D3                                                                             | TPSSH-D3                                                                             | $\omega$ B97X-D3                                                                      |
|----------------------|-------------------------------------------------------------------------------------|-------------------------------------------------------------------------------------|--------------------------------------------------------------------------------------|---------------------------------------------------------------------------------------|
| SOMO-3               | 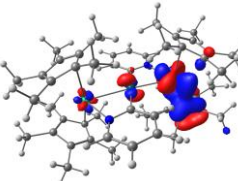   |    |    |    |
| SOMO-2               |    |    |    |    |
| SOMO-1               |    |    |    |    |
| SOMO                 |  |  |  |  |
| LUMO                 |  |  |  |  |
| LUMO+1               |  |  |  |  |
| LUMO+2               |  |  |  |  |

LUMO+3

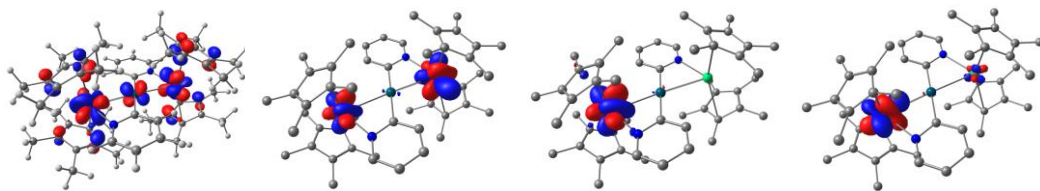

Table S22. Preview of main beta orbitals of **4** (isocontour value = 0.3), following single point energy calculation using several different density functionals

| Functional / Orbital | PBE-D3                                                                              | PBE0-D3                                                                             | TPSSH-D3                                                                             | $\omega$ B97X-D3                                                                      |
|----------------------|-------------------------------------------------------------------------------------|-------------------------------------------------------------------------------------|--------------------------------------------------------------------------------------|---------------------------------------------------------------------------------------|
| SOMO-3               | 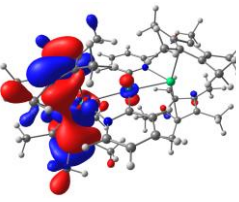   |    |    |    |
| SOMO-2               |    |    |    |    |
| SOMO-1               |   |   |   |   |
| SOMO                 |  |  |  |  |
| LUMO                 |  |  |  |  |
| LUMO+1               |  |  |  |  |
| LUMO+2               |  |  |  |  |



LUMO+3

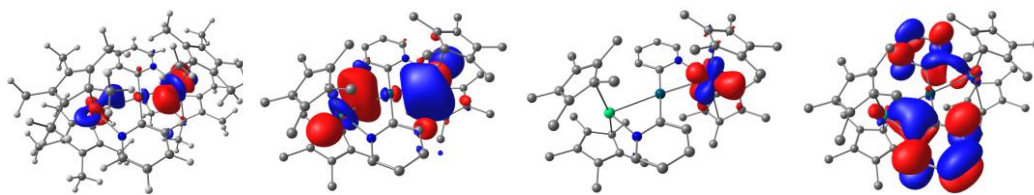

| Orbital | $\Delta E$ (SOMO vs orbital, Eh) |                                                                                      |
|---------|----------------------------------|--------------------------------------------------------------------------------------|
| SOMO-18 | -0.3090                          | 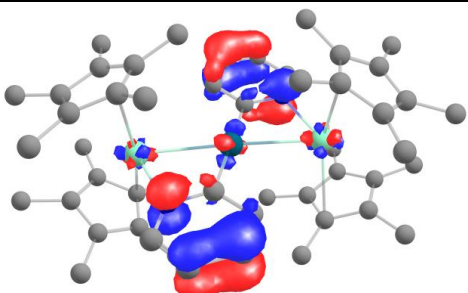   |
| SOMO-17 | -0.3074                          |    |
| SOMO-16 | -0.2994                          |   |
| SOMO-13 | -0.2676                          |  |
| SOMO-8  | -0.2147                          |  |

**Figure S38.** Preview of miscellaneous orbitals (isocontour value = 0.5) of interest in compound **4**, computed at the DFT/PBE0-D3 level of theory.

## 2) CASSCF calculations

CASSCF computations were performed with an initial active space of 10 electrons in 12 orbitals (10,12). This active space was progressively increased up to the (18,18) configuration, in order to take into account the Sm 4f electrons and Pd 4d electrons. Manual orbital permutations were undertaken in order to attempt to promote the Pd 4d electrons into the active space. Despite several attempts, including varying the size of the active space, these permutations were not successful.

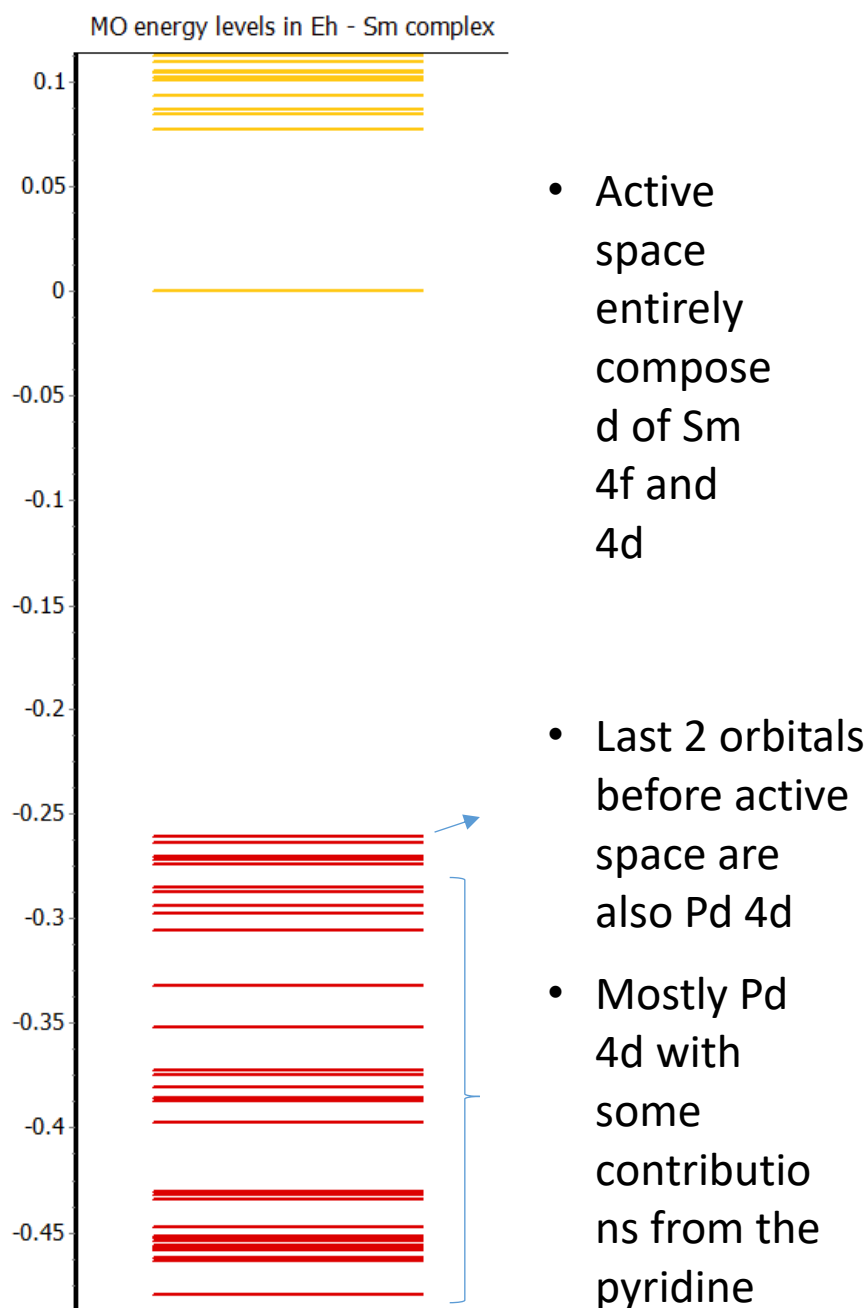

**Figure S39.** Schematic representation of the relative energies of the orbitals involving contributions from the metals in compound **4** at the CASSCF level of theory.

**Table S23:** CASSCF-derived orbitals of compound 4.

| Orbital type                           | $\Delta E$ (active space vs orbital, Eh)                                      | Orbital                                                                              |
|----------------------------------------|-------------------------------------------------------------------------------|--------------------------------------------------------------------------------------|
| Orbitals with contributions from Pd 4d | 0.4798                                                                        | 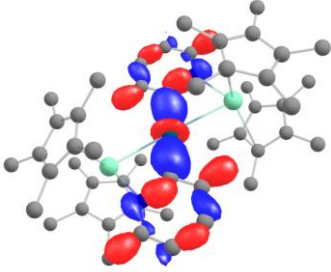   |
|                                        | 10 consecutive comparable orbitals between 0.4308-0.3060 Eh from active space |    |
|                                        | 0.2642                                                                        |   |
| Active space                           | 0                                                                             |  |
|                                        | 0                                                                             |  |

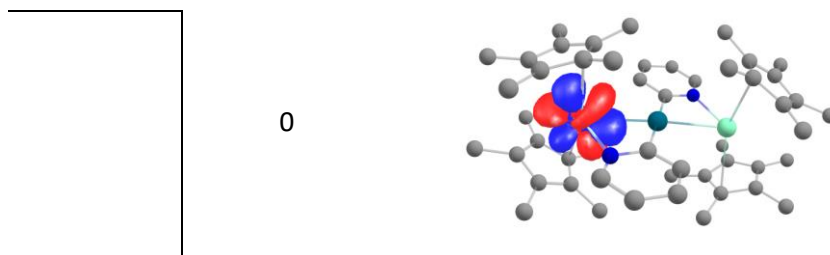

c) Compound 5

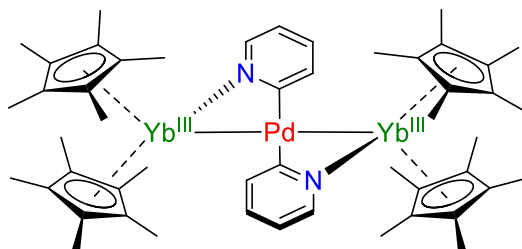

1) DFT calculations

**Table S24.** Main distances (in Å) and angles (in °) in **5**, as observed in the crystal structure and in the DFT optimized geometries using the PBE-D3 density functional.

| Distance \ source                                                | XRD structure | PBE-D3  |
|------------------------------------------------------------------|---------------|---------|
| Yb <sub>1</sub> -Pd                                              | 2.924(1)      | 2.902   |
| Yb <sub>2</sub> -Pd                                              | 2.924(1)      | 2.902   |
| Yb <sub>1</sub> -N <sub>pyridyl</sub>                            | 2.275(3)      | 2.320   |
| Yb <sub>2</sub> -N <sub>pyridyl</sub>                            | 2.275(3)      | 2.320   |
| Yb <sub>1</sub> -C <sub>pyridyl</sub>                            | 2.773(4)      | 2.844   |
| Yb <sub>2</sub> -C <sub>pyridyl</sub>                            | 2.773(4)      | 2.843   |
| Yb <sub>1</sub> - Cp* <sub>1 ctr</sub>                           | 2.345         | 2.370   |
| Yb <sub>1</sub> - Cp* <sub>2 ctr</sub>                           | 2.339         | 2.371   |
| Yb <sub>2</sub> - Cp* <sub>1 ctr</sub>                           | 2.345         | 2.370   |
| Yb <sub>2</sub> - Cp* <sub>2 ctr</sub>                           | 2.339         | 2.371   |
| Pd-C <sub>pyridyl1</sub>                                         | 2.078(4)      | 2.077   |
| Pd-C <sub>pyridyl2</sub>                                         | 2.078(4)      | 2.077   |
| <(C <sub>pyridyl1</sub> -Pd-C <sub>pyridyl2</sub> )              | 178.88(18)°   | 176.44° |
| <(Cp* <sub>1 ctr</sub> -Yb <sub>1</sub> - Cp* <sub>2 ctr</sub> ) | 134.70°       | 131.92° |
| <(Cp* <sub>1 ctr</sub> -Yb <sub>2</sub> - Cp* <sub>2 ctr</sub> ) | 134.70°       | 131.92° |

**Table S25.** Preview of main alpha orbitals of **5** (isocontour value = 0.3), following single point energy calculation using different density functionals

| Functional /<br>Orbital | PBE0-D3                                                                             | TPSSH-D3                                                                             | $\omega$ B97X-D3                                                                      |
|-------------------------|-------------------------------------------------------------------------------------|--------------------------------------------------------------------------------------|---------------------------------------------------------------------------------------|
| SOMO-3                  | 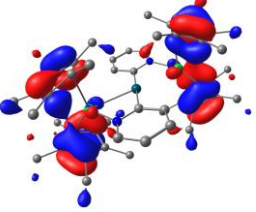   |    |    |
| SOMO-2                  |    |    |    |
| SOMO-1                  |   |   |   |
| SOMO                    |  |  |  |
| LUMO                    |  |  |  |
| LUMO+1                  |  |  |  |

LUMO+2

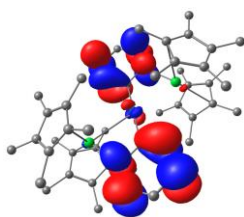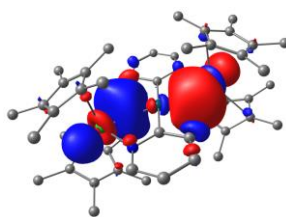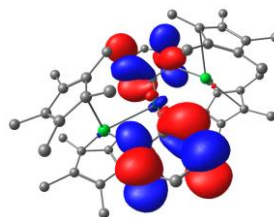

LUMO+3

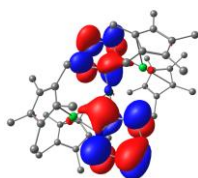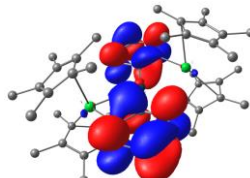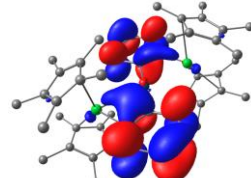

**Table S26.** Preview of main beta orbitals of **5** (isocontour value = 0.3), following single point energy calculation using different density functionals

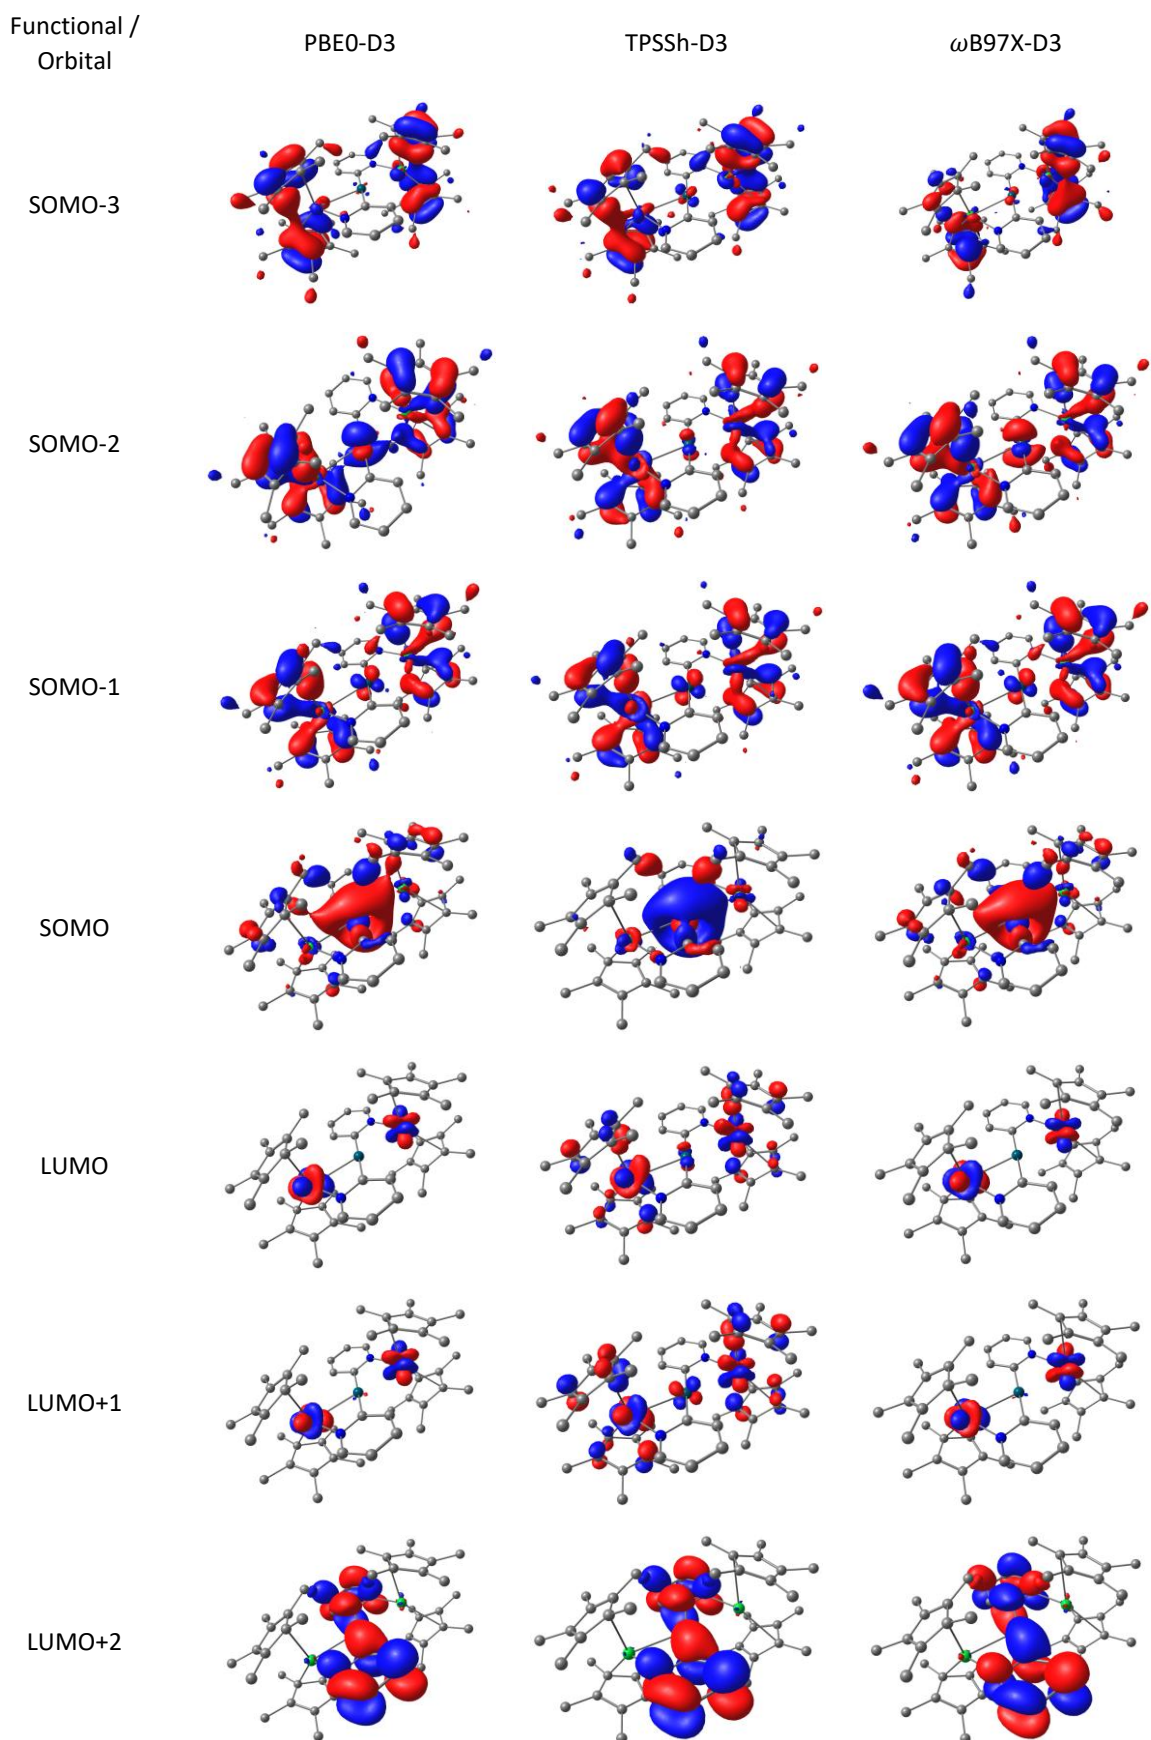



LUMO+3

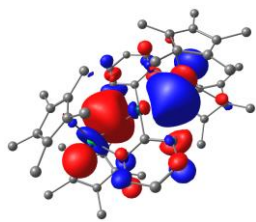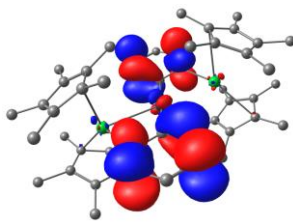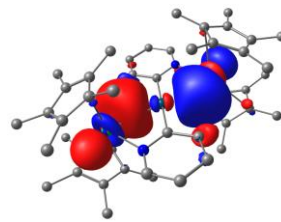

| Orbital | $\Delta E$ (SOMO vs orbital, Eh) |                                                                                      |
|---------|----------------------------------|--------------------------------------------------------------------------------------|
| SOMO-64 | 0.2214                           | 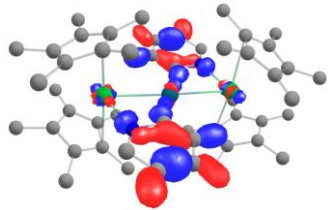   |
| SOMO-32 | 0.1654                           |    |
| SOMO-18 | 0.1194                           |   |
| SOMO-16 | 0.113                            |  |
| SOMO-13 | 0.0731                           |  |

**Figure S40.** Preview of miscellaneous orbitals (isocontour value = 0.5) of interest in compound **5**, computed at the DFT/PBE0-D3 level of theory.

## 2) CASSCF calculations

CASSCF computations were performed with an initial active space of 6 electrons in 12 orbitals (6,12). This active space was progressively increased up to the (12,16) configuration, in order to take into account the Yb 4f electrons and Pd 4d electrons. Manual orbital permutations were undertaken in order to attempt to promote the Yb 4f electrons into the active space. Despite several attempts, including varying the size of the active space, these permutations were not successful.

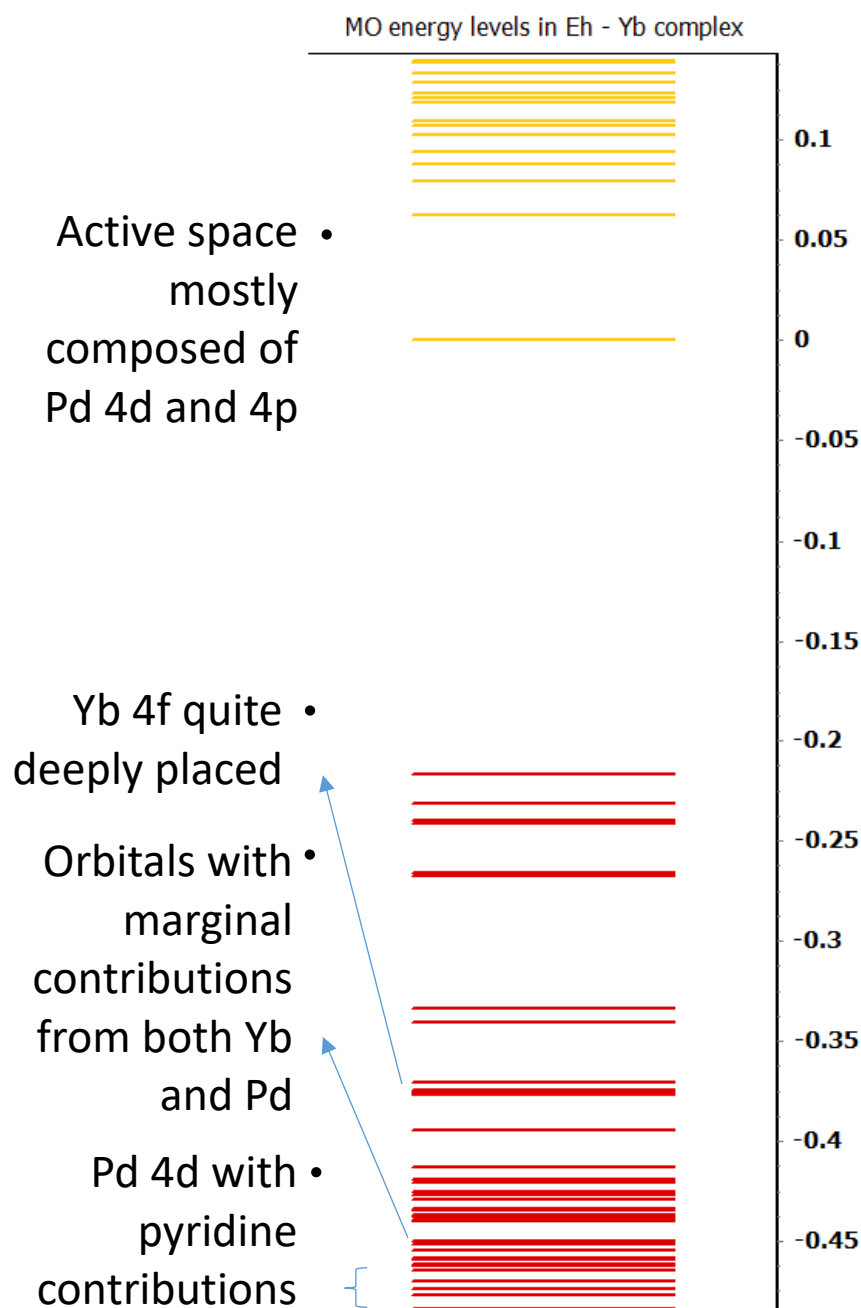

**Figure S41.** Schematic representation of the relative energies of the orbitals involving contributions from the metals in compound **5** at the CASSCF level of theory.

**Table S27.** CASSCF-derived orbitals of compound 5.

| Orbital type                                             | $\Delta E$ (active space vs orbital, Eh)    | Orbital |
|----------------------------------------------------------|---------------------------------------------|---------|
| Orbitals with marginal contributions from both Yb and Pd | 0.4612                                      |         |
|                                                          | 0.4590                                      |         |
|                                                          | 0.4579                                      |         |
|                                                          | 0.4499                                      |         |
|                                                          | Several such orbitals between 0.4397-0.4370 |         |

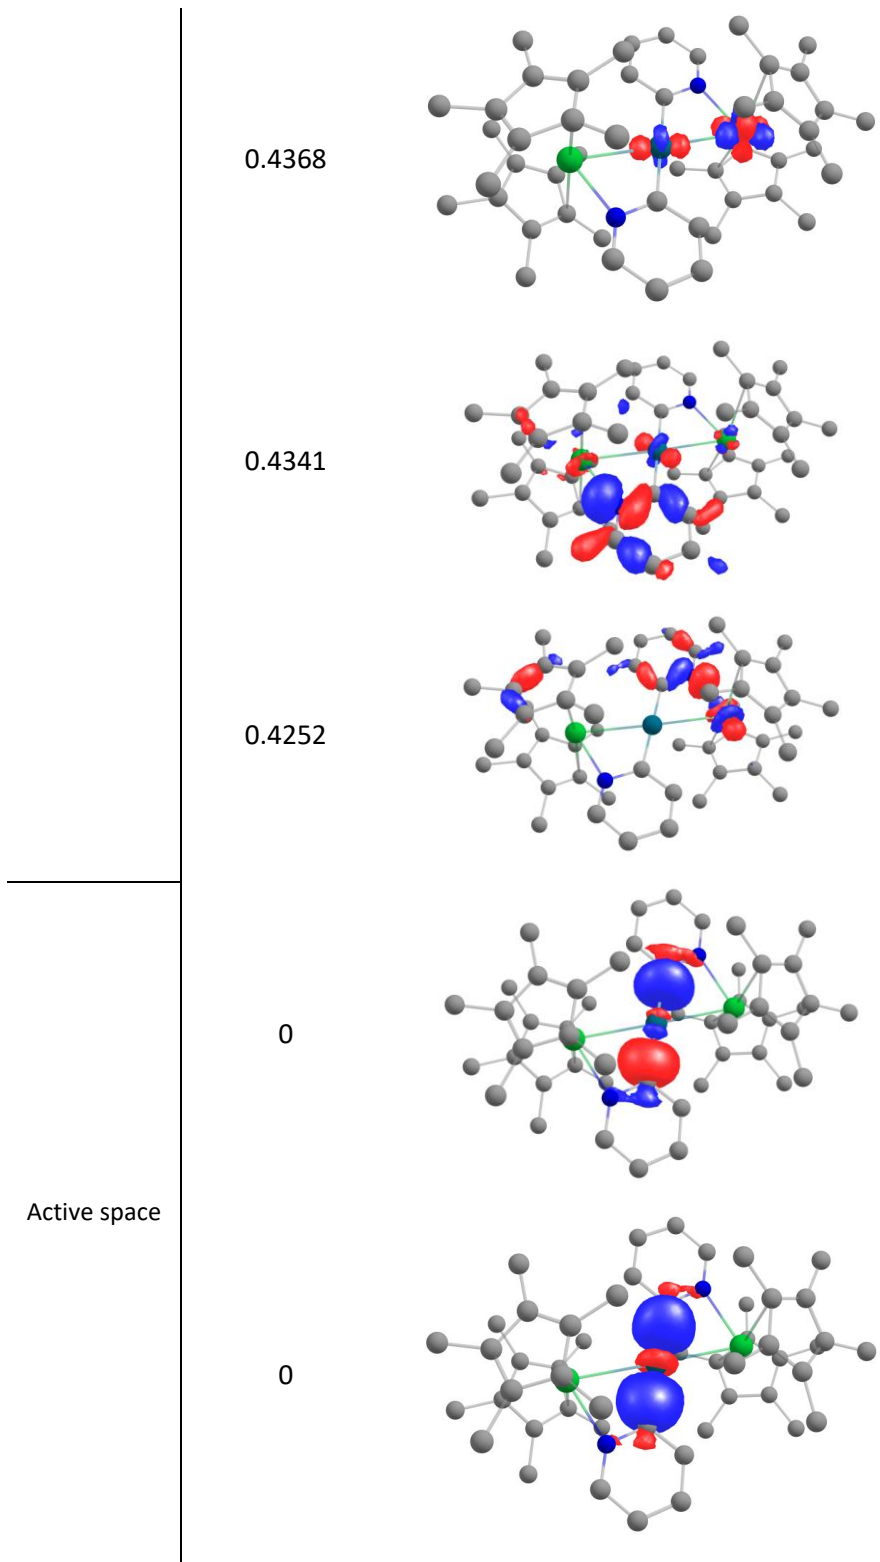

Vacant  
active space

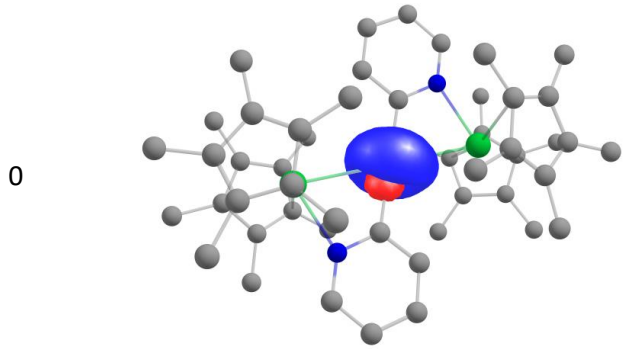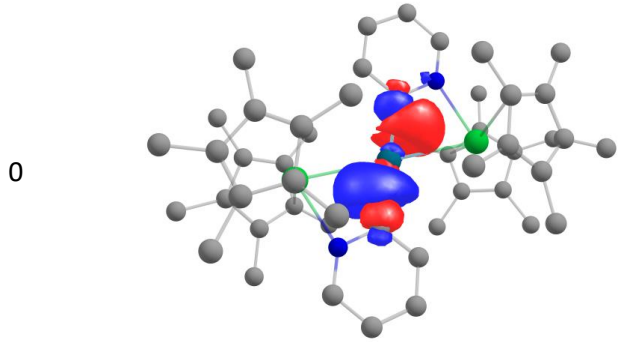

d) Compound 6

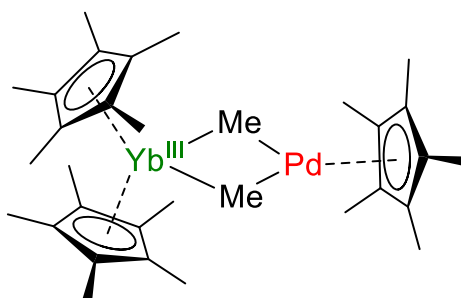

**Table S28.** Summary of main distances (in Å) and angles in **6** in the crystal structure and in the DFT optimized geometry.

| Distance \ source   | XRD structure | PBE-D3 doublet |
|---------------------|---------------|----------------|
| Yb-Pd               | 2.877(1)      | 2.922          |
| Pd-Me <sub>1</sub>  | 2.123(2)      | 2.116          |
| Pd-Me <sub>2</sub>  | 2.123(2)      | 2.120          |
| Yb-H <sub>Me1</sub> | 2.179         | 2.196          |
| Yb-H <sub>Me2</sub> | 2.233         | 2.205          |
| Yb-C <sub>Me1</sub> | 2.552(2)      | 2.602          |
| Yb-C <sub>Me2</sub> | 2.559(2)      | 2.602          |
| Pd – Cp*ctr         | 2.017         | 2.036          |
| Yb – Cp*ctr (avg)   | 2.332         | 2.359          |

**Table S29.** Preview of miscellaneous orbitals (isocontour value = 0.5) of interest in compound **6**, computed at the DFT/PBE0-D3 level of theory.

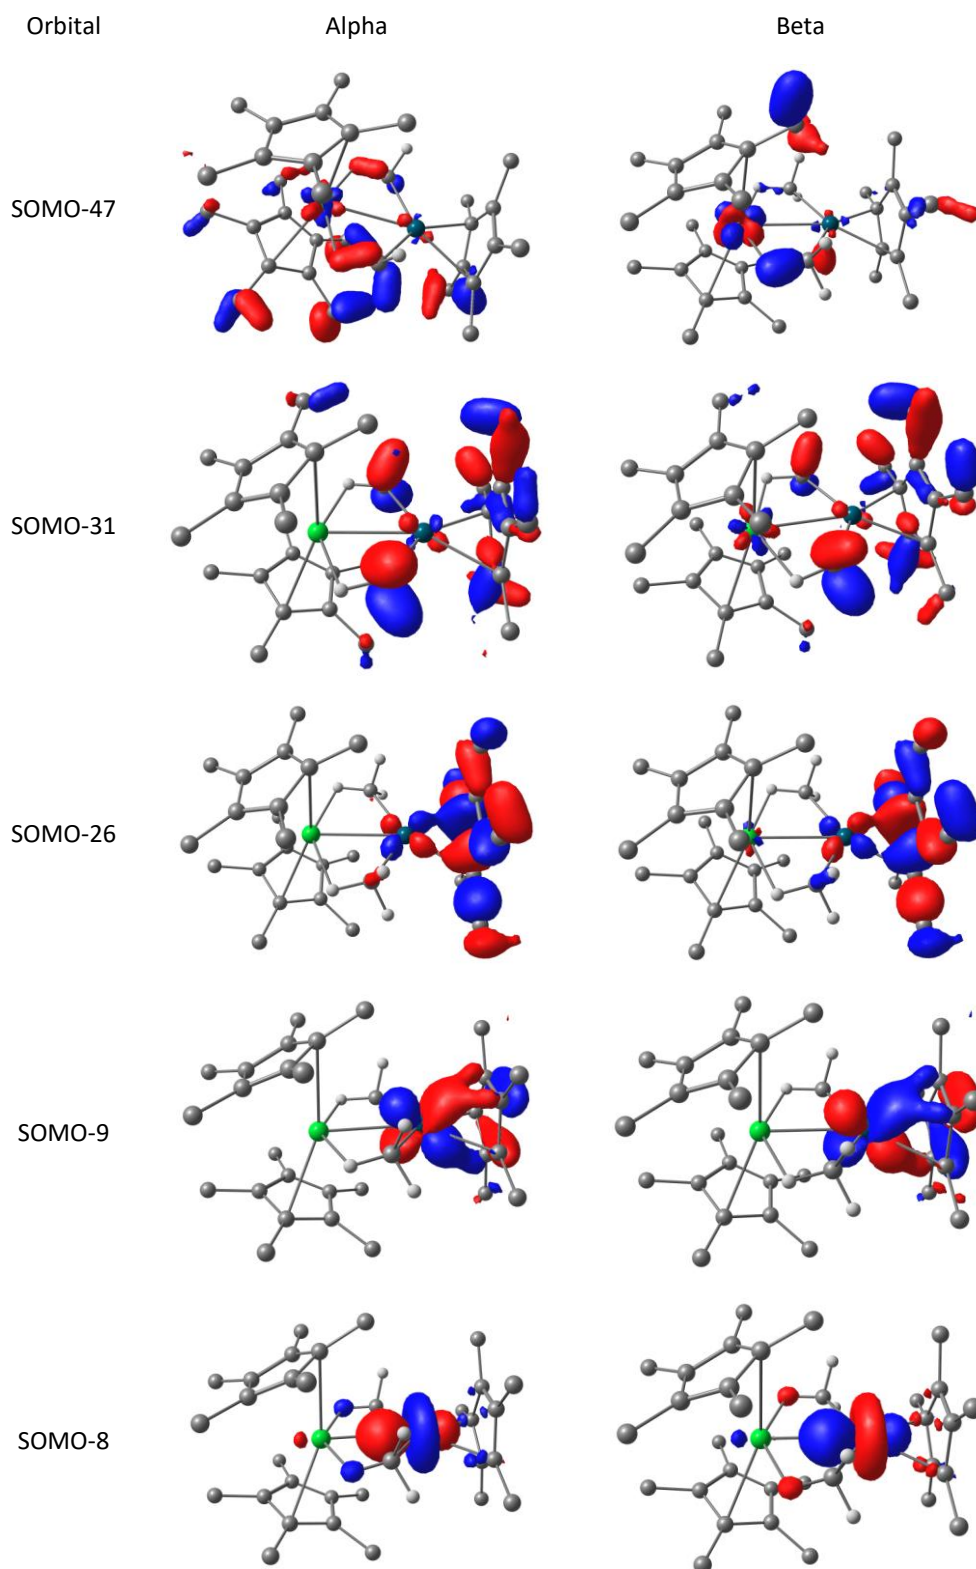



SOMO

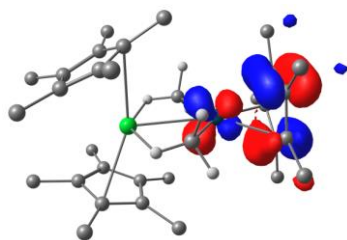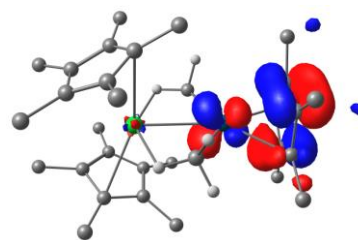

LUMO

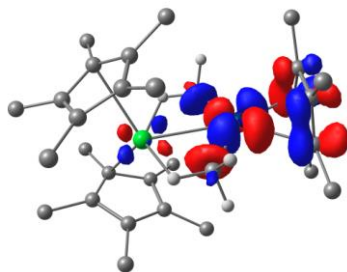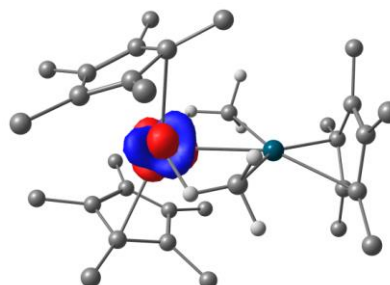

**Table S30.** Preview of representative CASSCF-generated orbitals of the compound **6**.

| Orbital type                                          | $\Delta E$ (active space vs orbital, Eh) | Orbital |
|-------------------------------------------------------|------------------------------------------|---------|
| Pd 4d – Cp*                                           | 0.4748                                   |         |
|                                                       | 0.4551                                   |         |
| Orbitals with contributions from both Pd 4d and Yb 4f | 0.4063                                   |         |
|                                                       | 0.3970                                   |         |

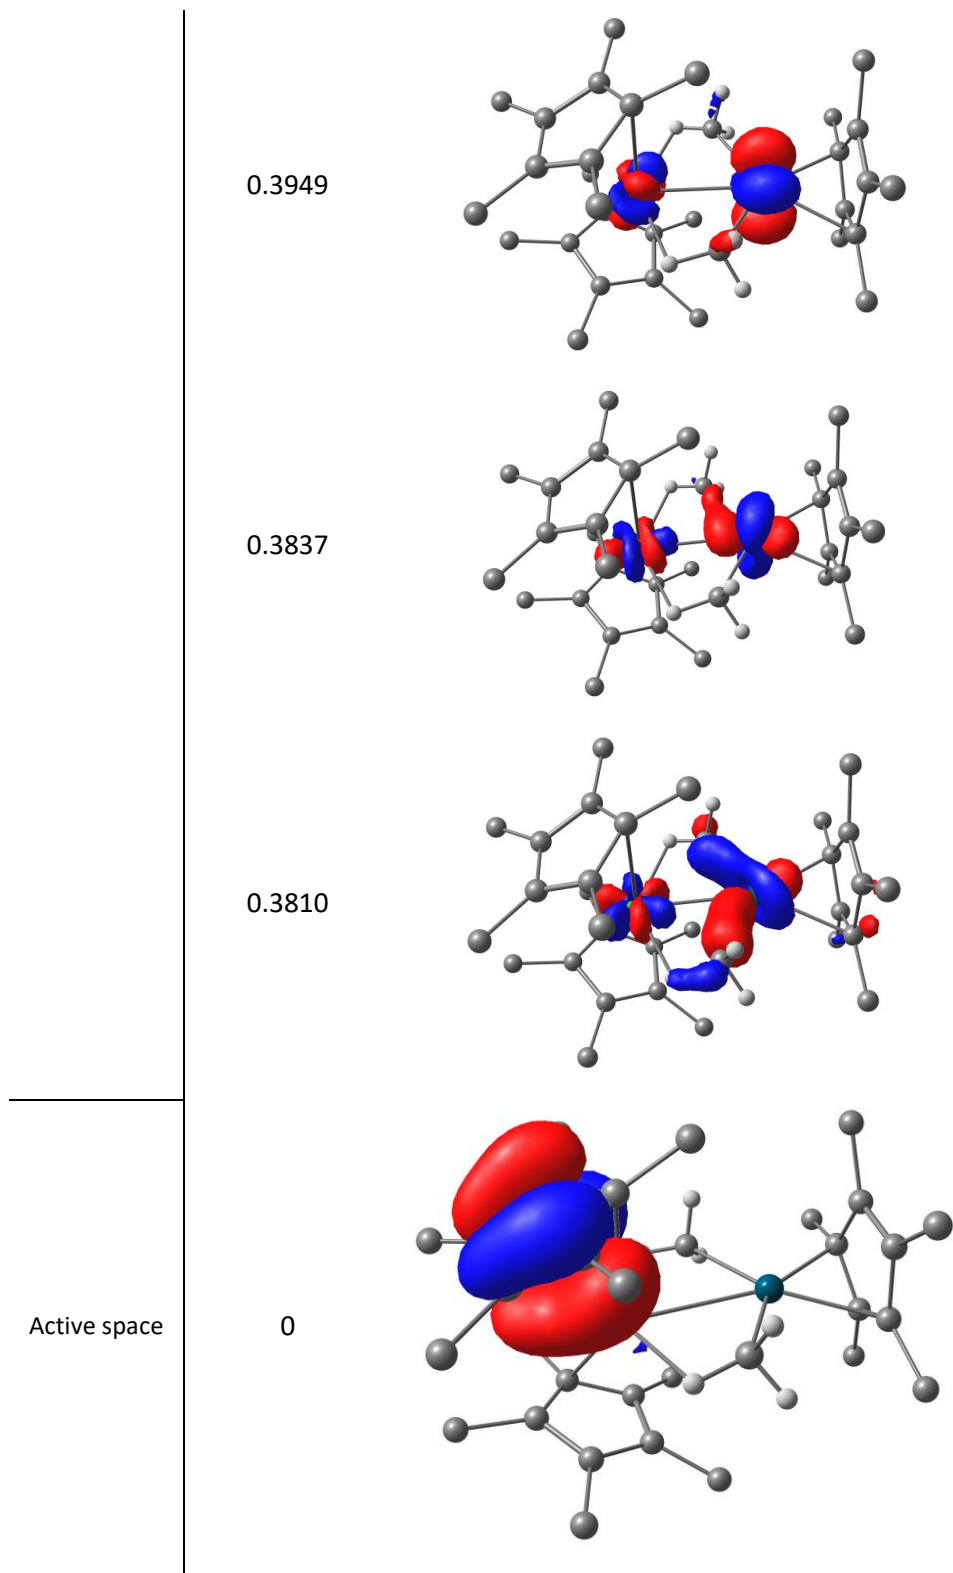

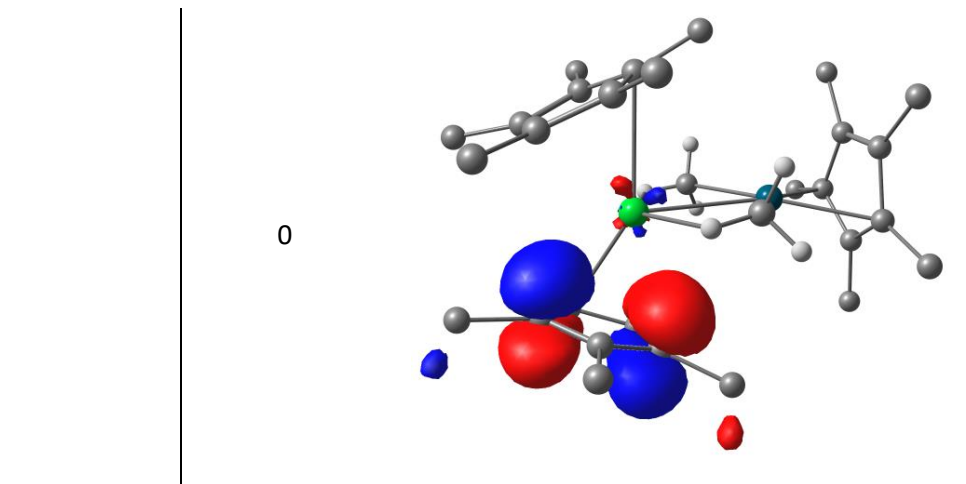

## 2. Topological analyses

### a) Density Overlap Regions Indicator (DORI) results

Color code: non-covalent interaction in green, repulsion in red, covalent interaction in blue.

DORI plot for **4** : signature of a covalent interaction between Sm and N.

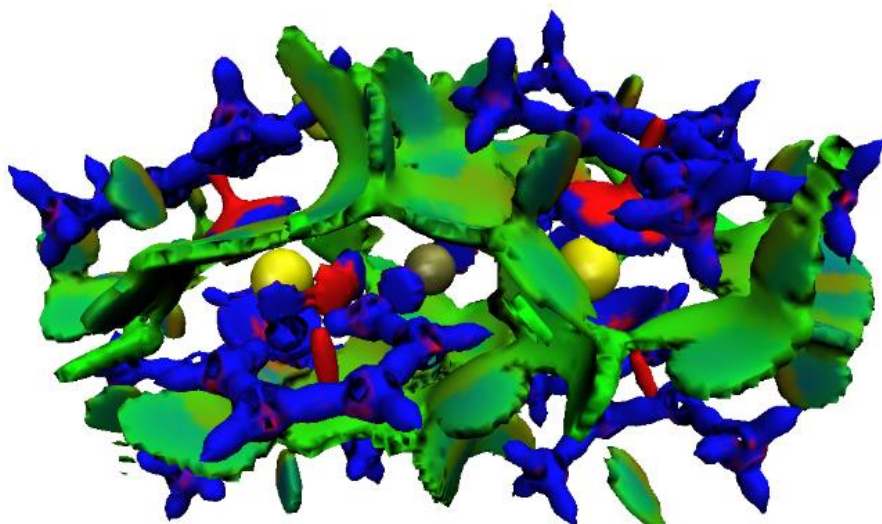

*Figure S42: DORI plot for 4.*

DORI plot for **5** : signature of a covalent interaction between Yb and N.

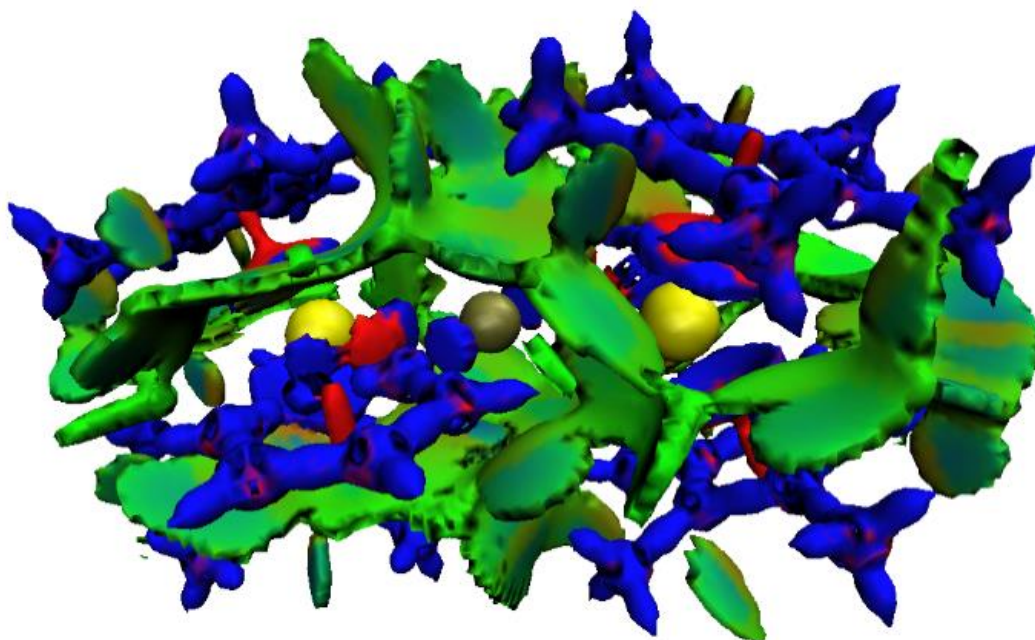

*Figure S43: DORI plot for 5.*

### b) QTAIM analysis

The value of the Laplacian  $\nabla^2(\rho(\text{BCP}))$  is an indication of the type of interactions, which is to be paired with the value of the total energy density  $H(\text{BCP})$ . The absolute values are related to the strength of the interactions. For example, a covalent bond is described by large negative values for both metrics, whilst positive ones correspond to ionic interactions. In our case, the values correspond to weak dative interactions.<sup>35</sup> Further, the delocalisation index (DI) is a measure of the quantitative sharing of electrons between the two considered atoms, but, according to Bader, is not equivalent to a bond order.<sup>36</sup>

Table S31: QTAIM analysis of the intermetallic adducts. Nomenclature:  $\rho(\text{BCP})$  – electron density at the BCP;  $\nabla^2(\rho(\text{BCP}))$  – Laplacian of the density;  $H(\text{BCP})$  – energy density at the BCP; DI – delocalisation index.

|   | Property            | $\rho(\text{BCP})$ | $\nabla^2(\rho(\text{BCP}))$ | $H(\text{BCP})$ | DI    |
|---|---------------------|--------------------|------------------------------|-----------------|-------|
| 4 | Sm-N <sub>pyr</sub> | 0.06               | 0.183                        | -0.007          | 0.346 |
|   | Sm-Pd               | 0.04               | 0.083                        | -0.008          | 0.354 |
|   | Pd-C <sub>pyr</sub> | 0.11               | 0.305                        | -0.032          | 0.847 |
| 5 | Yb-N <sub>pyr</sub> | 0.06               | 0.217                        | -0.008          | 0.339 |
|   | Yb-Pd               | 0.03               | 0.058                        | -0.007          | 0.267 |
|   | Pd-C <sub>pyr</sub> | 0.11               | 0.313                        | -0.033          | 0.860 |
| 6 | Yb-C <sub>Me</sub>  | 0.04               | 0.129                        | -0.002          | 0.192 |
|   | Yb-Pd               | 0.04               | 0.064                        | -0.007          | 0.200 |

c) **ELF** analysis

Description and plot of the valence basins for the interaction in **4**

Table S32: Main ELF basins in **4**.

| Basins                                                                             | Integration | Nature | Localization Index |
|------------------------------------------------------------------------------------|-------------|--------|--------------------|
| 50                                                                                 | 56.6        | Sm     | 4.22               |
| 51                                                                                 | 5.8         | Pd-C   | 0.395              |
| 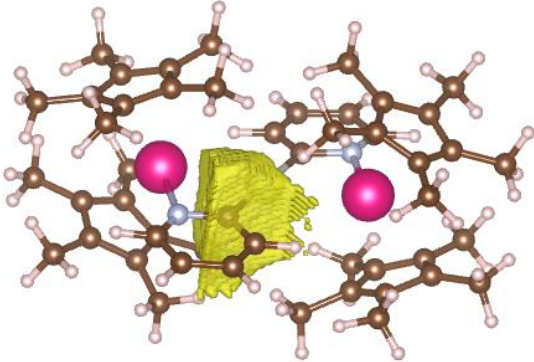  |             |        |                    |
| 53                                                                                 | 8.2         | Sm-N   | 0.401              |
|  |             |        |                    |
| 63                                                                                 | 45.6        | Pd-C   | 0.417              |
| 83                                                                                 | 8.3         | Sm-N   | 0.340              |
| 84                                                                                 | 59.6        | Sm     | 3.949              |
| 85                                                                                 | 5.8         | Pd-C   | 0.412              |



Description and plot of the valence basins for the interaction in 5

Table S33: Main ELF basins in 5.

| Basins | Integration | Nature | Localization Index |
|--------|-------------|--------|--------------------|
| 78     | 2.81        | Yb-N   | 4.31               |
| 88     | 2.15        | Yb-Pd  | 1.89               |
| 92     | 2.14        | Yb-(N) | 0.226              |
| 105    | 2.29        | Pd-C   | 1.046              |
| 108    | 2.11        | Pd-C   | 1.041              |
| 120    | 2.84        | Yb-N   | 1.533              |
| 127    | 0.32        | Yb-Pd  | 0.019              |
| 148    | 2.11        | Yb-(N) | 1.863              |

|     |                                                                                   |      |         |       |
|-----|-----------------------------------------------------------------------------------|------|---------|-------|
| 152 | 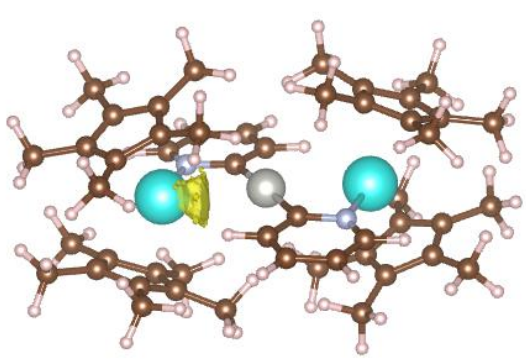 | 0.77 | Yb-(Pd) | 0.142 |
| 158 |                                                                                   | 0.73 | Yb-(N)  | 1.317 |

d) Energy decomposition analysis (EDA)

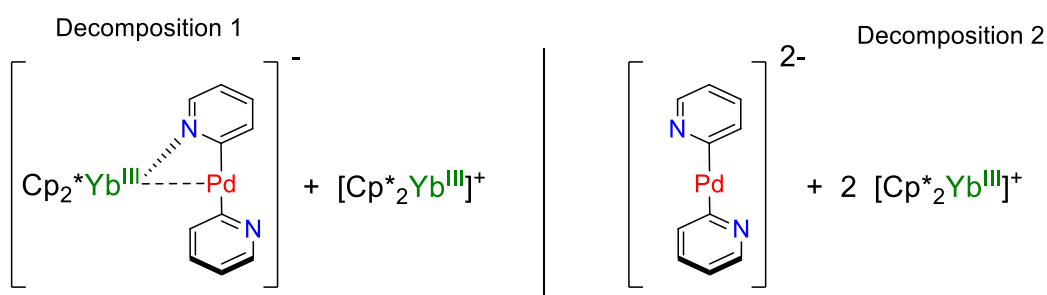

Figure S44. EDA decomposition schemes for the trimetallic complexes (5 is shown as an example).

Table S34. EDA results for complex 5, following the two proposed decomposition schemes. The fragments are computed as neutral fragments. All energies are given in kcal/mol.

|                          | Decomposition 1 |                   | Decomposition 2   |                   |
|--------------------------|-----------------|-------------------|-------------------|-------------------|
|                          | 4               | 5                 | 4                 | 5                 |
| Pauli repulsion (steric) | 239.88<br>(67)  | 227.55<br>(62.07) | 466.72<br>(41.49) | 466.59<br>(42.44) |
| Electrostatic            | -172.88         | -165.47           | -425.23           | -404.15           |
| Orbital                  | -169.31         | -160.41           | -201.36           | -203.61           |
| Dispersion               | -22.01          | -22.59            | -31.57            | -32.69            |
| Bonding Energy           | -124.32         | -120.92           | -191.44           | -193.87           |
| Orbital %                | 46              | 46                | 31                | 32                |

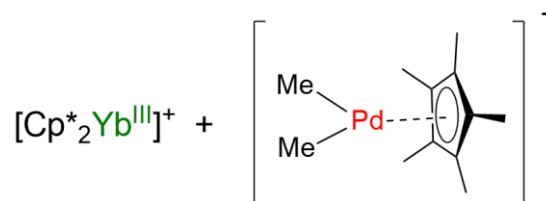

Figure S45. EDA decomposition schemes for 6.

Table S35. EDA results for complex 6, computed as either neutral and charged fragments. Hirshfeld charges and Mayer bond order as well as “WBO” – Wiberg bond order; “FSR” – formal shortness ratio. All energies are given in kcal/mol.

|                          | Neutral fragments  | Charged fragments  |
|--------------------------|--------------------|--------------------|
| Pauli repulsion (steric) | 424.94<br>(261.15) | 102.54<br>(-65.62) |
| Electrostatic            | -163.79            | -168.16            |
| Orbital                  | -354.5             | -83.75             |
| Dispersion               | -17.94             | -17.94             |
| Bonding Energy           | -111.29            | -167.31            |
| Orb%                     | 66                 | 31                 |

#### Hirshfeld charges

Table S36: Hirshfeld charges computed for the trimetallic adducts 4 and 5.

| 4              | 5       |
|----------------|---------|
| Sm 0.47 / 0.48 | Yb 0.57 |
| Pd 0.17        | Pd 0.17 |
| N -0.13        | N -0.14 |

#### Mayer bond order

Table S37: Mayer bond orders computed for the trimetallic adducts 4 and 5.

| 4          | 5           |
|------------|-------------|
| Sm-N 0.08  | Yb-N 0.31   |
| Pd-C 0.94  | Pd-C 1.31   |
| Sm-Pd 0.09 | Yb-Pd <0.05 |

#### Bond Indices

Table S38: Commonly used bond indices, computed for 4-6.

|     | 4    | 5    | 6    |
|-----|------|------|------|
| WBO | 0.77 | 0.62 | 0.53 |
| FSR | 0.99 | 1.01 | 0.99 |

### 3. C-H activation – calculating the transition state

In the interests of reducing the computational cost, transition state computations were initially undertaken on simplified structures, as shall be described below.

#### 1. Computations on the compound **1**

The calculated transition state – henceforth referred to as **1-TS** – had a single imaginary frequency of  $1065\text{ cm}^{-1}$ . This frequency corresponds to an oscillatory motion of the activated hydrogen (in the  $\alpha$  position of the pyridine) between the two carbons. The methyl also displays bending motions of the three H atoms, in order to adopt a geometry closer to tetrahedral, characteristic of free methane.

##### a) Transition state calculations

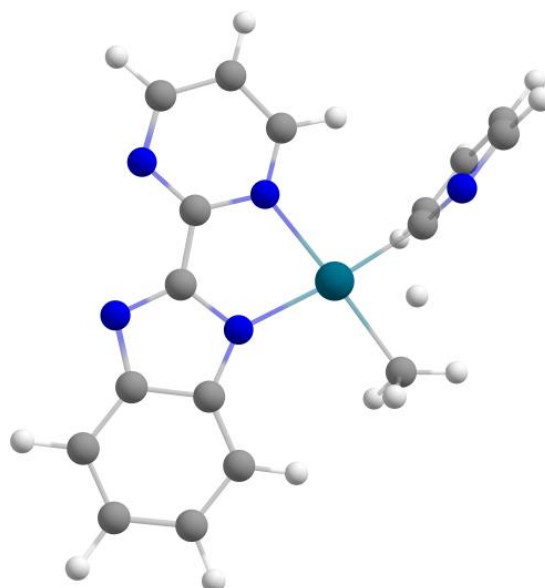

*Figure S46: Structure of 1-TS.*

Both the difference in enthalpy ( $\Delta H$ ) and in the Gibbs free energy ( $\Delta G$ ) are computed. These show that the **1-TS** is higher in energy by approximately 29.5-36 kcal/mol (depending on the density functional).

b) Second possible transition state

Multiple starting geometries were tested to probe whether there are other TS available on the potential energy surface. Across these trials, only one configuration led to a different structure, shown in **Figure S47**, where the pyridyl is fully coordinated to the C in the  $\alpha$  position and the N acts as a proton shuttle. The methyl is rearranged in an intermediate configuration between that of the GS and that of free methane. Frequency calculations resulted in a single imaginary frequency ( $1488\text{ cm}^{-1}$ ), which is consistent with a second possible TS, **1-TS2**.

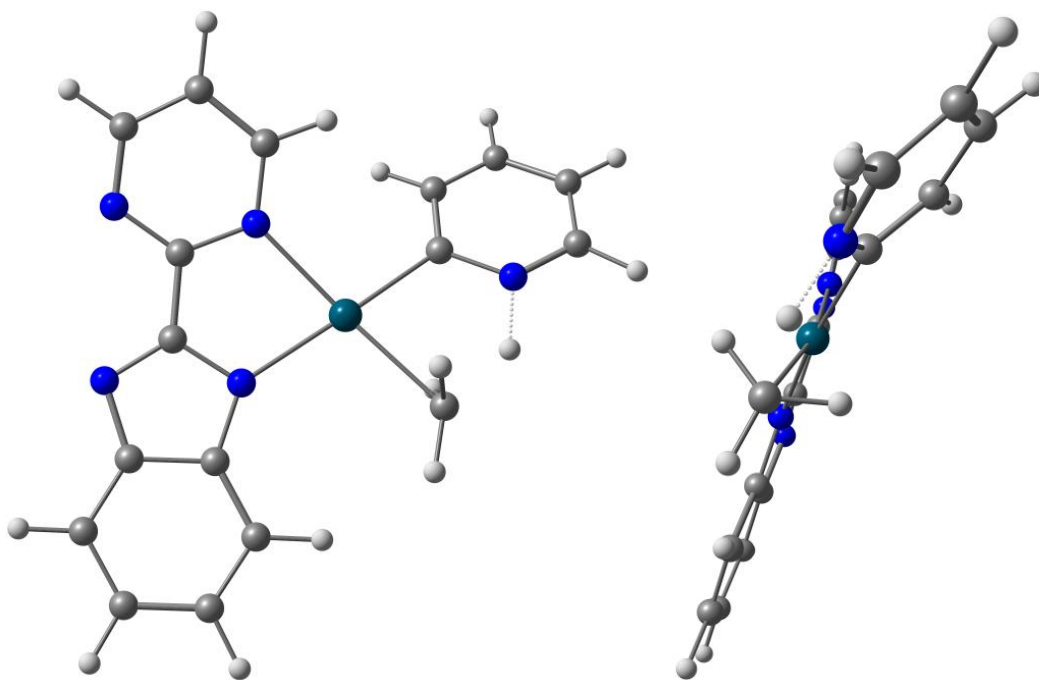

*Figure S47 : Second possible TS, front and side view.*

The steric repulsion that is inherent to the second TS configuration exerts a cost from an energetic standpoint, as the computations show it to be approximately 12-20 kcal/mol higher in energy than **1-TS**, depending on the density functional that was used. Overall, it is around 45-50 kcal/mol higher in energy than the GS. This energy barrier is very large and unfeasible for a transformation in ambient conditions. Because of this difference, **1-TS2** is not considered in further computations.

c) Computing the departure of the methyl

The next step, consistent with the expected reorganisation leading to the structures of the trimetallic edifices, would be the departure of the methyl moiety as methane. To this effect, they were removed and the structure was reoptimized.

The reduction of the number of substituents in the coordination sphere of the Pd metal centre results in an  $\eta^2$ -coordination mode, where the pyridyl is coordinated by both the N atom and the activated vicinal C atom. This configuration shall henceforth be referred to as **1- $\eta^2$** .

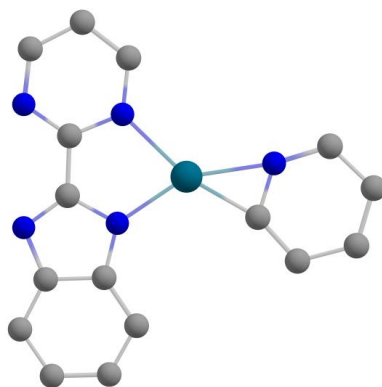

**Figure S48:** Structure of **1- $\eta^2$** .

d) Comparison between the two possible transition states

**Table S39.** Main distances (in Å) in the crystal structure, as well as in the two possible TS. “pym” and “imid” designate the pyrimidine and the 2-(benzimidazol-2-yl) moieties on the ligand, respectively. The computations were performed at the DFT/PBE-D3 level of theory.

| Distance \ source    | XRD structure | <b>1-TS</b> | <b>1-TS2</b> |
|----------------------|---------------|-------------|--------------|
| Pd-C <sub>Me</sub>   | 2.022(3)      | 2.148       | 2.224        |
| Pd-N <sub>py</sub>   | 2.040(2)      |             |              |
| Pd-C <sub>py</sub>   |               | 2.098       | 2.043        |
| Pd-H <sub>Me</sub>   |               | 1.650       | 1.975        |
| N-H <sub>Me</sub>    |               |             | 1.282        |
| Pd-N <sub>pym</sub>  | 2.176(2)      | 2.115       | 2.137        |
| Pd-N <sub>imid</sub> | 2.034(2)      | 2.060       | 2.070        |

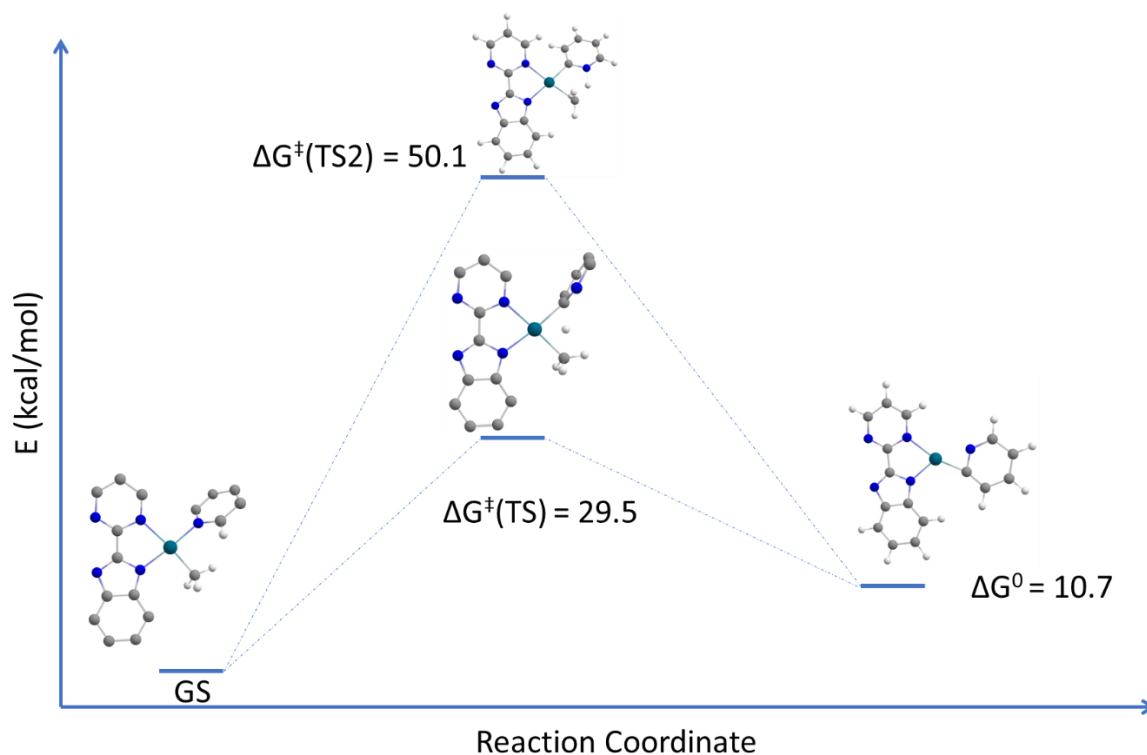

*Figure S49: Schematic representation of the two computed TS with respect to the energy of the transformation.*

The energy profile is consistent with the fact that the C-H activation does not occur on 1 under the attempted experimental conditions (UV light and/or temperatures above 80 °C). Closer approximations to the experimental system were sought out.

## 2. Computations with addition of lanthanides

### a) Modelling an interaction between Cp\*<sub>2</sub>Ln and compound **1**

Computations were performed on putative heterobimetallic adducts between the Cp\*<sub>2</sub>Sm precursor and compound **1** with a spin state  $S = 5/2$ , which will henceforth be designated as **1-Sm** and the analogous Yb (with a spin state of  $S = 1$ ) adduct, **1-Yb**. The geometries were optimized at the DFT/PBE-D3 level of theory.

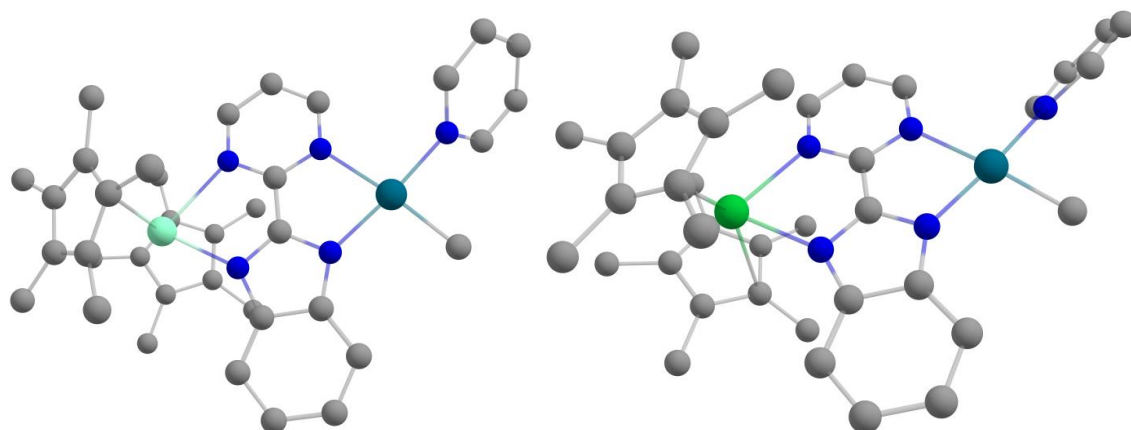

*Figure S50. Optimized geometry of 1-Sm (left) and 1-Yb (right).*



**Table S40.** Main distances (in Å) and angles (in °) in the XRD structure of **1** and in the optimized geometry of **1-Sm**, **1-Yb** and **1-Eu**. “pym” and “imid” designate the pyrimidine and the 2-(benzimidazol-2-yl) moieties on the ligand, respectively.

| Atoms                               | Av. Values |             |             |
|-------------------------------------|------------|-------------|-------------|
|                                     | <b>1</b>   | <b>1-Sm</b> | <b>1-Yb</b> |
| Pd-Me                               | 2.022(3)   | 2.033       | 2.034       |
| Pd-N <sub>pyr</sub>                 | 2.040(2)   | 2.032       | 2.031       |
| Pd-N <sub>pym</sub>                 | 2.176(2)   | 2.177       | 2.176       |
| Pd-N <sub>imid</sub>                | 2.034(2)   | 2.035       | 2.032       |
| C <sub>pym</sub> -C <sub>imid</sub> | 1.462(4)   | 1.444       | 1.419       |
| Ligand plane <sup>^</sup> pyr       | 60.68      | 59.50       | 58.74       |
| Ln-N <sub>pym</sub>                 |            | 2.521       | 2.422       |
| Ln-N <sub>imid</sub>                |            | 2.500       | 2.326       |
| Ln – Cp* <sub>ctr</sub> (avg)       |            | 2.458       | 2.349       |

**Table S41.** Preview of main alpha orbitals (isocontour value = 0.3) of **1-Sm**, following single point energy calculation using different density functionals

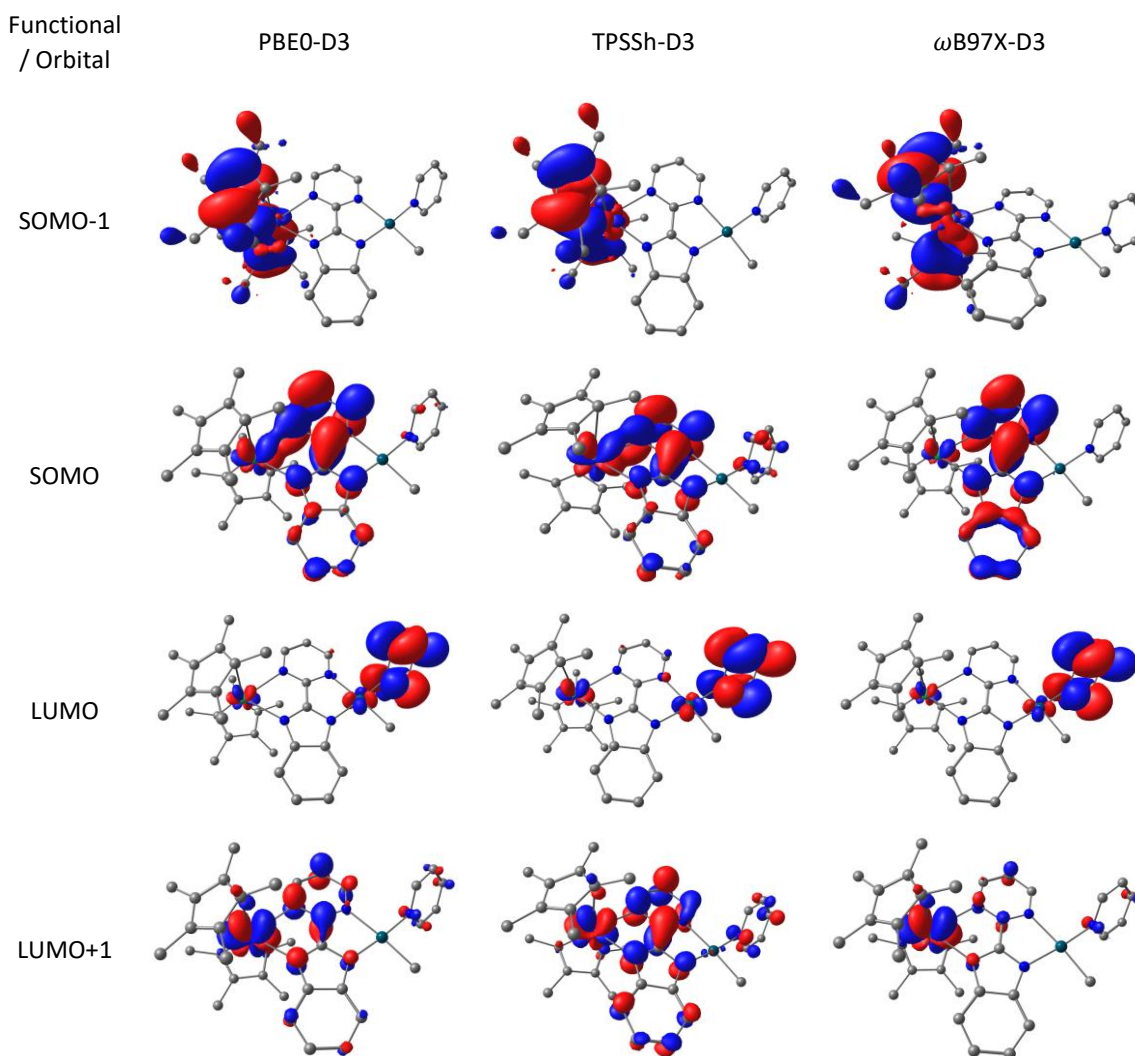

**Table S42.** Preview of main beta orbitals (isocontour value = 0.3) of **1-Sm**, following Single Point calculation using multiple density functionals.

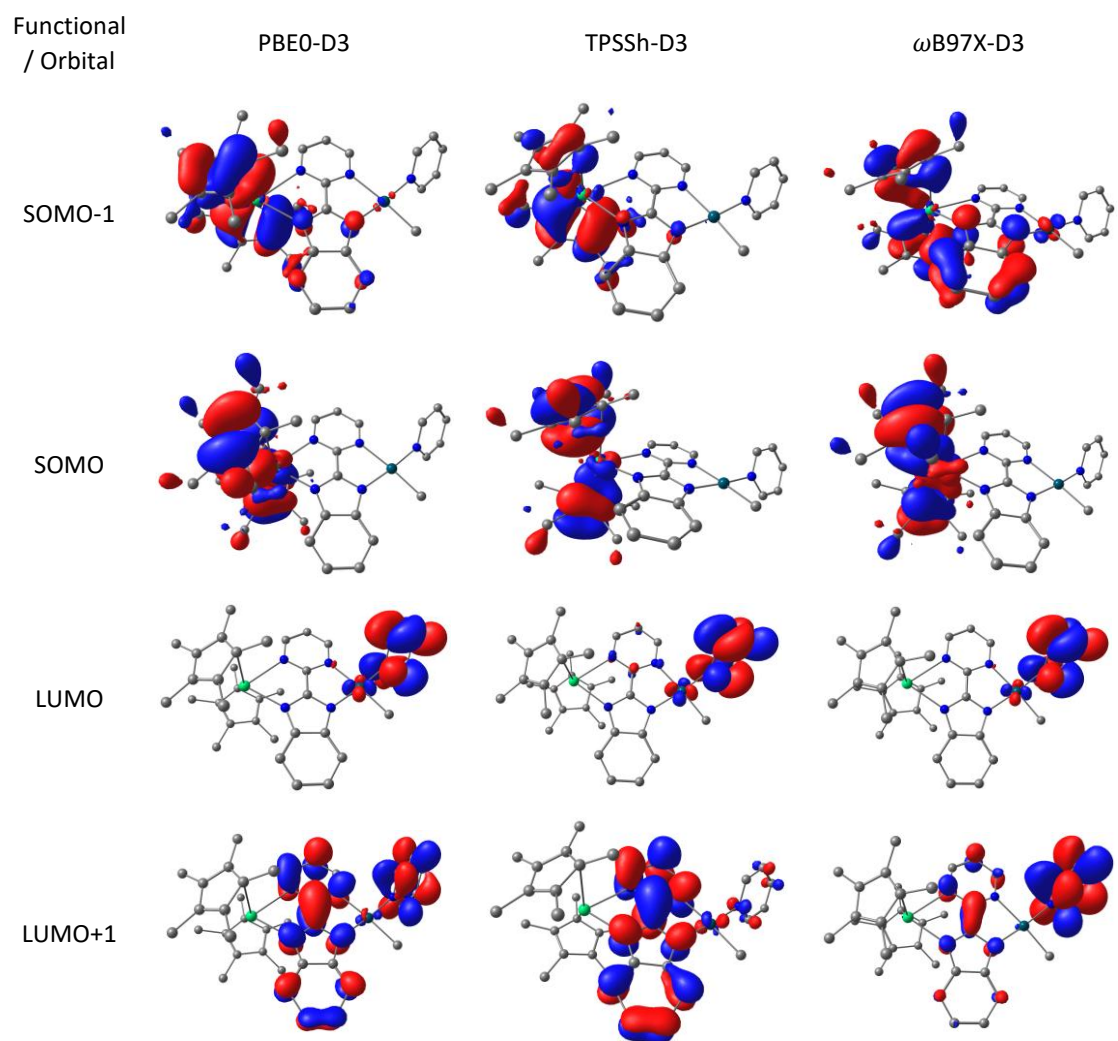

**Table S43.** Preview of main alpha orbitals (isocontour value = 0.5) of **1-Yb**, following single point energy calculation using different density functionals.

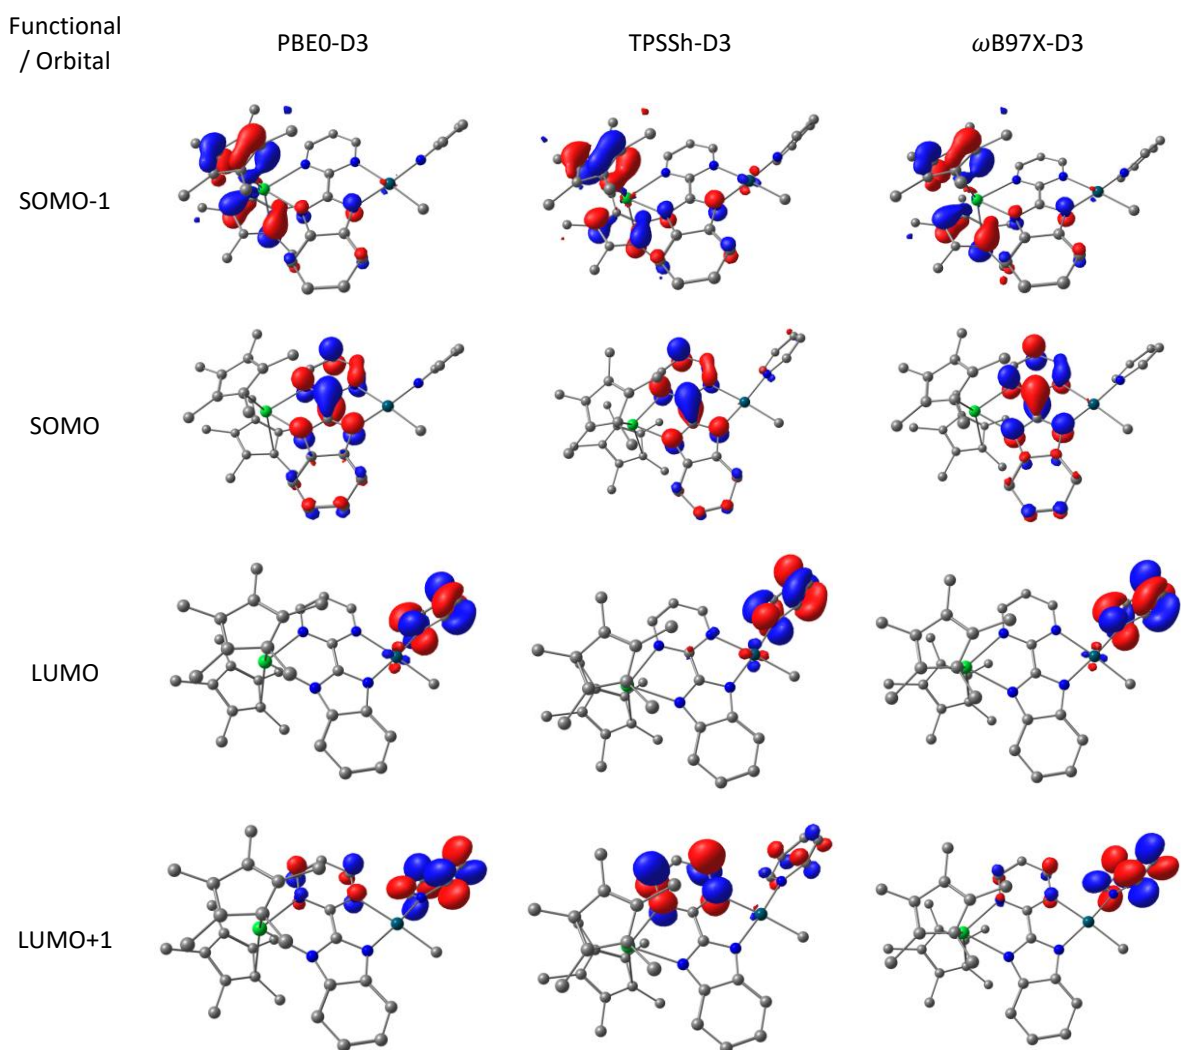

**Table S44.** Preview of main beta orbitals (isocontour value = 0.5) of **1-Yb**, following single point energy calculation using different density functionals.

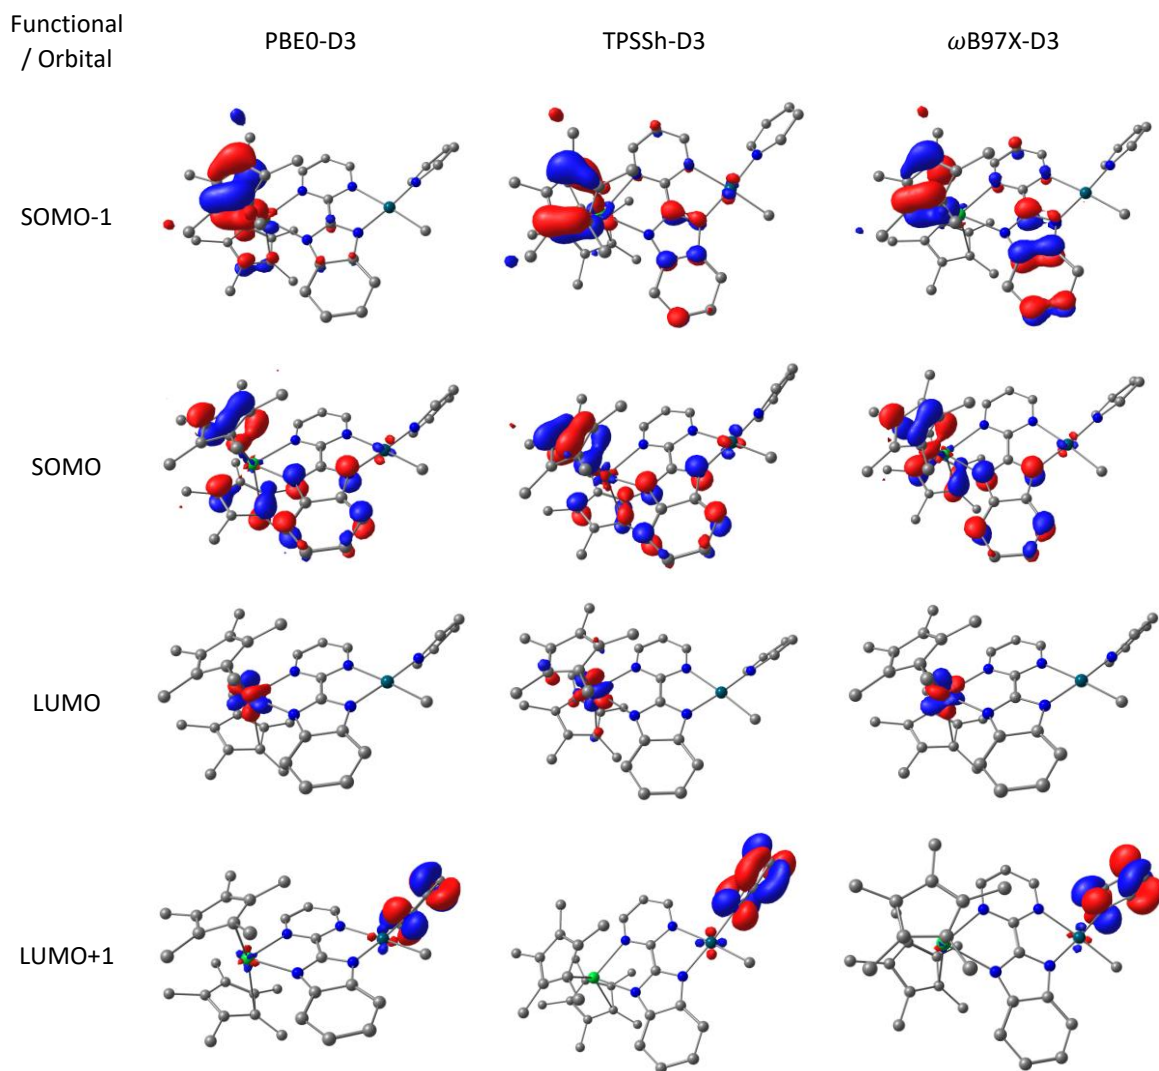

### 3. Computations with the explicit addition of another lanthanide

#### a) Modelling the addition of a further lanthanide

One further molecule of  $\text{Cp}^*_2\text{Ln}$  was added to **1-Ln** by nestling it in the cavity formed by  $\text{C}_{\text{Me}}\text{-Pd-py}$  so that steric hindrance is minimized. Geometry optimizations were then performed to optimize the resulting structures. These complexes shall henceforth be referred to as **8** (Yb) and **14** (Sm). In both cases, the  $\text{Cp}^*_2\text{Ln}$  fragment remained tilted below the plane formed by the ligand.

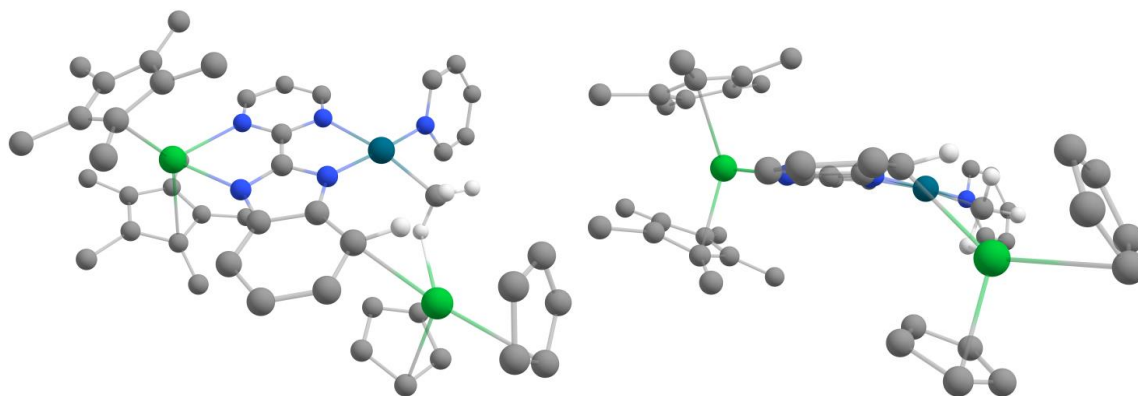

*Figure S51. Optimized geometry of 8.*

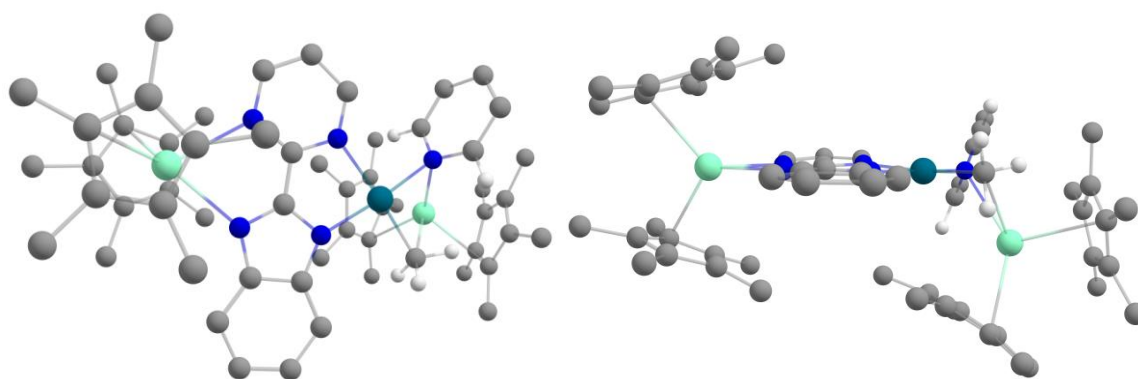

*Figure S52. Optimized geometry of 14.*

**Table S45.** Comparison of the main distances (in Å) and angles (in °) in **1** and in all the computed heterobimetallic species. "pym" and "imid" designate the pyrimidine and the 2-(benzimidazol-2-yl) moieties on the ligand, respectively.

| Atoms                                      | Av. Values |           |             |             |           |          |
|--------------------------------------------|------------|-----------|-------------|-------------|-----------|----------|
|                                            | <b>1</b>   | <b>TS</b> | <b>1-Sm</b> | <b>1-Yb</b> | <b>14</b> | <b>8</b> |
| Pd-Me                                      | 2.022(3)   | 2.149     | 2.033       | 2.034       | 2.053     | 2.036    |
| Pd-N <sub>py</sub> (or C <sub>py</sub> )   | 2.040(2)   | 2.105     | 2.032       | 2.031       | 2.083     | 2.037    |
| Pd-N <sub>pym</sub>                        | 2.176(2)   | 2.127     | 2.177       | 2.176       | 2.164     | 2.154    |
| Pd-N <sub>imid</sub>                       | 2.034(2)   | 2.065     | 2.034       | 2.032       | 2.056     | 2.027    |
| C <sub>pym</sub> -C <sub>imid</sub>        | 1.462(4)   | 1.445     | 1.444       | 1.419       | 1.434     | 1.418    |
| Ligand plane <sup>^</sup> py               | 60.68°     | 89.25°    | 59.50°      | 58.74°      | 70.89°    | 69.19°   |
| Ln-N <sub>pym</sub>                        |            |           | 2.521       | 2.422       | 2.557     | 2.450    |
| Ln-N <sub>imid</sub>                       |            |           | 2.500       | 2.326       | 2.482     | 2.398    |
| Ln <sub>1</sub> – Cp* <sub>ctr</sub> (avg) |            |           | 2.458       | 2.349       | 2.448     | 2.345    |
| Ln <sub>2</sub> – Cp* <sub>ctr</sub> (avg) |            |           |             |             | 2.486     | 2.350    |
| Pd-H <sub>α</sub>                          |            | 1.653     |             |             |           |          |
| Ln <sub>2</sub> -ligand plane              |            |           |             |             | ~55°      | ~49°     |
| Ln <sub>2</sub> -H <sub>α</sub>            |            |           |             |             | 2.816     | 2.672    |
| Ln <sub>2</sub> -H <sub>1Me</sub>          |            |           |             |             | 2.531     | 2.369    |
| Ln <sub>2</sub> -H <sub>1Me</sub>          |            |           |             |             | 2.680     | 2.692    |
| Ln <sub>2</sub> -C <sub>Me</sub>           |            |           |             |             | 2.796     | 2.936    |
| (Pyr plane) <sup>^</sup> (Pd-N bond)       |            |           |             |             | 148.17°   | 176.3°   |

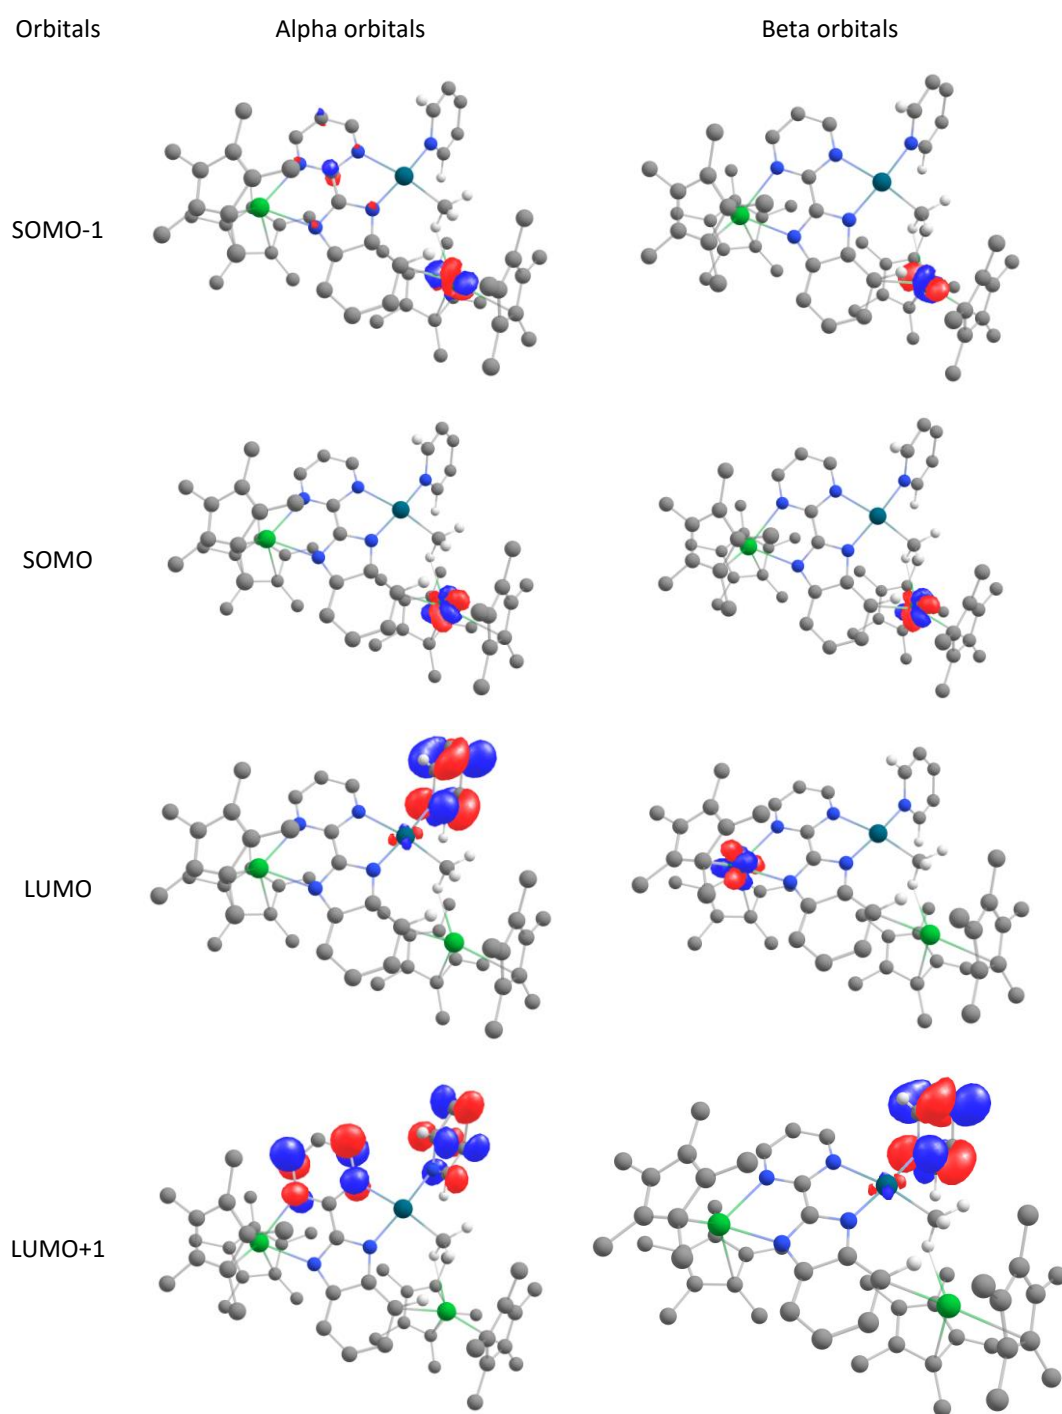

**Figure S42.** Preview of main orbitals (isocontour value = 0.5) of **8**, following single point energy calculation at the DFT/PBE0-D3 level of theory.

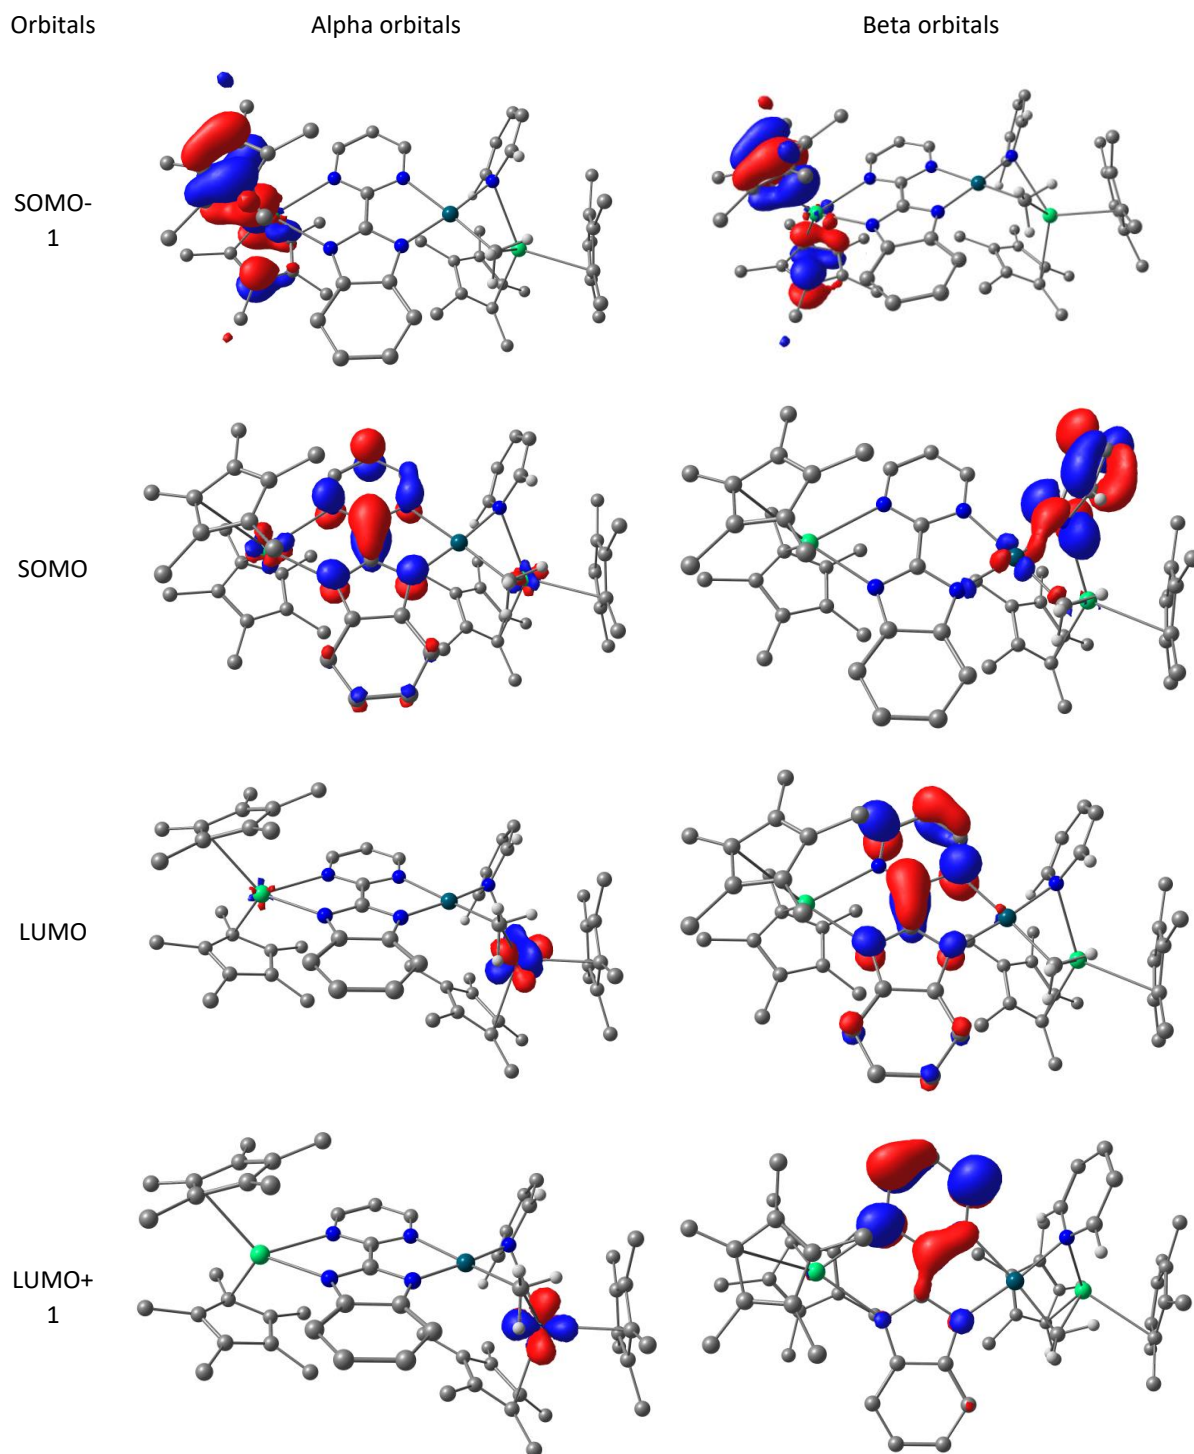

**Figure S54.** Preview of main orbitals (isocontour value = 0.5) of **14**, following single point energy calculation at the DFT/PBE0-D3 level of theory.



b) Species on the full C-H activation energy profile

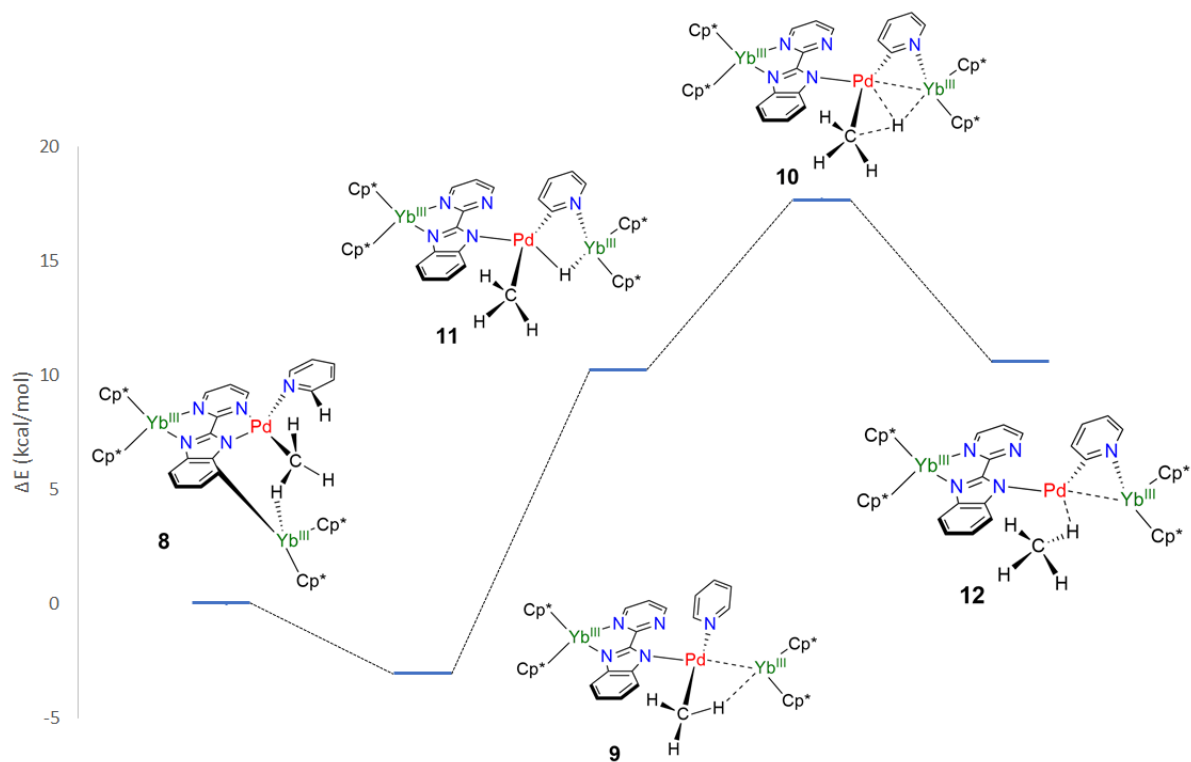

Figure S43: Energy profile of the C-H activation step.

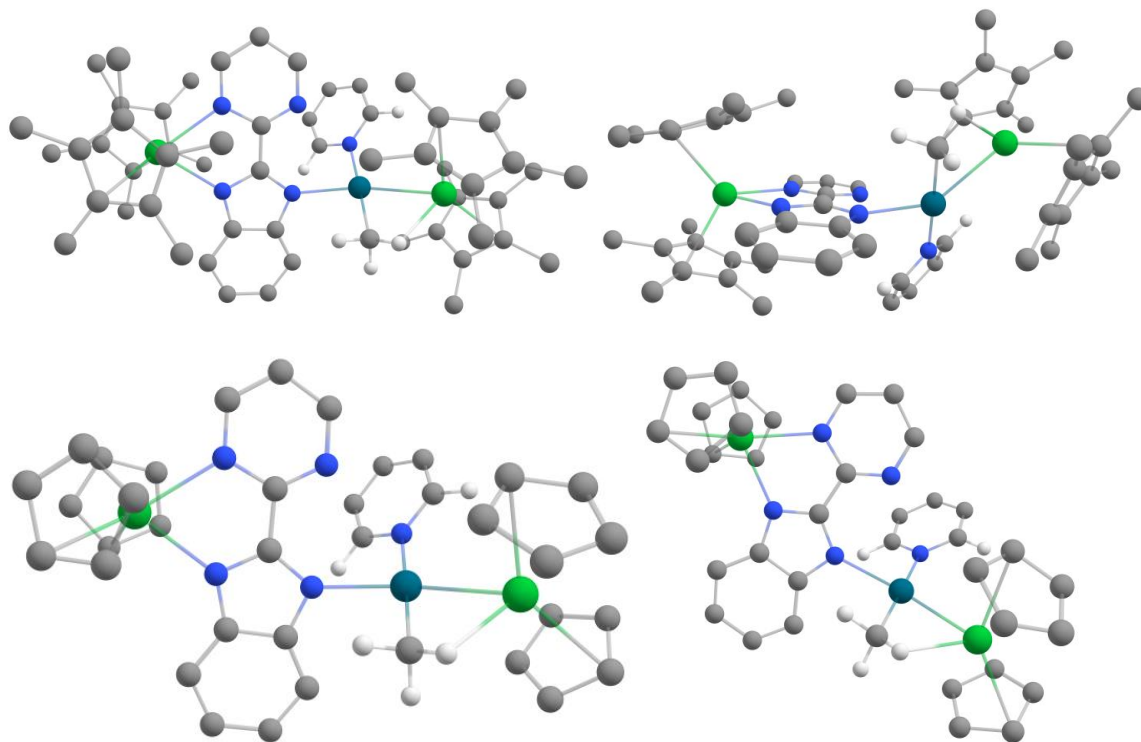

Figure S44: Structure of 9. The majority of H atoms and the  $C_{Me}$  of the Cp\* co-ligands are hidden in the interest of clarity.

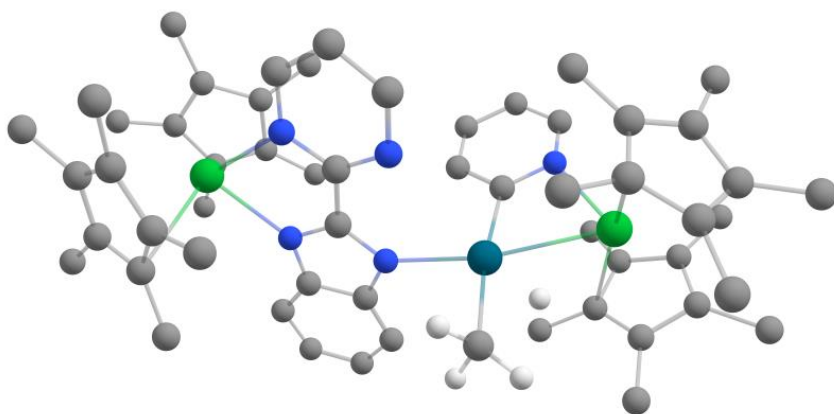

**Figure S57:** Structure of the transition state, **10**. The majority of H atoms are hidden in the interest of clarity.

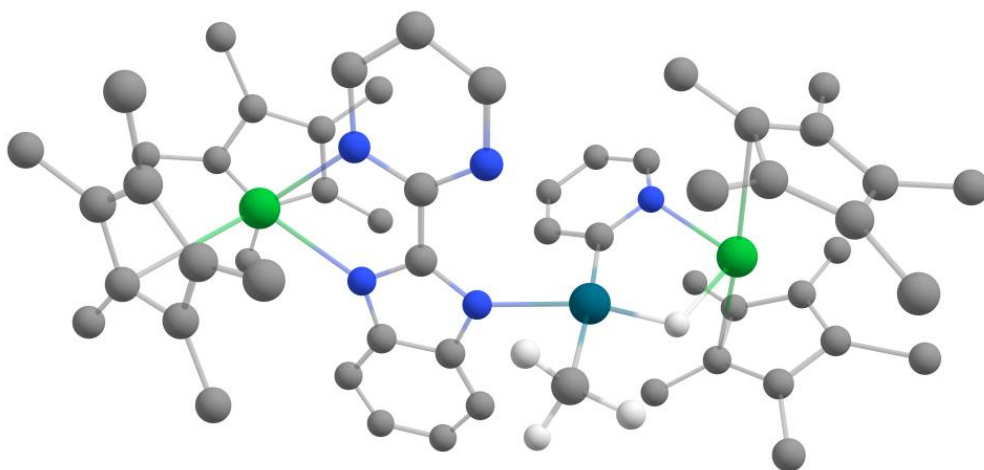

**Figure S58:** Structure of **11**, obtained following an intrinsic reaction coordinate computation performed in the backward direction starting from the TS, **10**. The majority of H atoms are hidden in the interest of clarity.

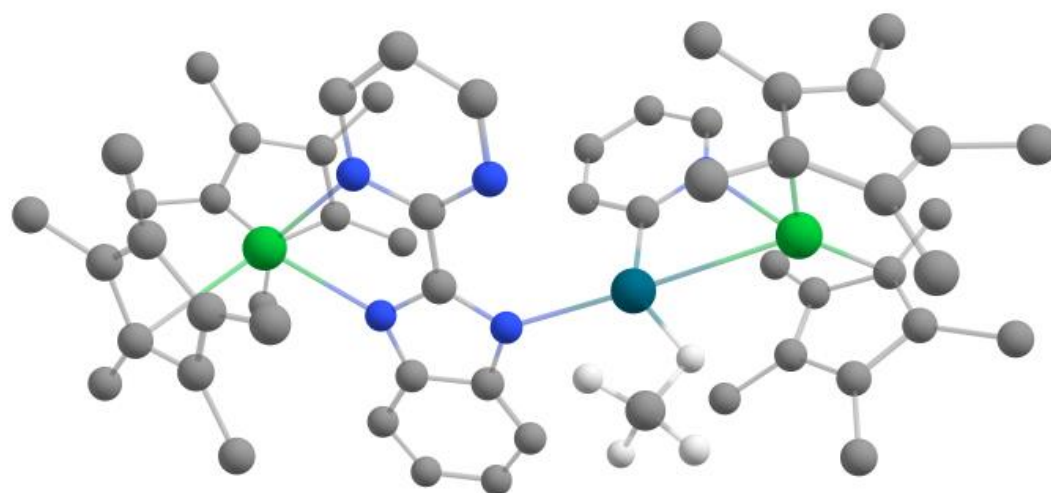

**Figure S45:** Structure of **12**, obtained following an intrinsic reaction coordinate computation performed in the forward direction starting from the TS, **10**. The majority of H atoms are hidden in the interest of clarity. **12** was reoptimized with a fixed Pd-H<sub>α</sub> distance of 1.891 Å.

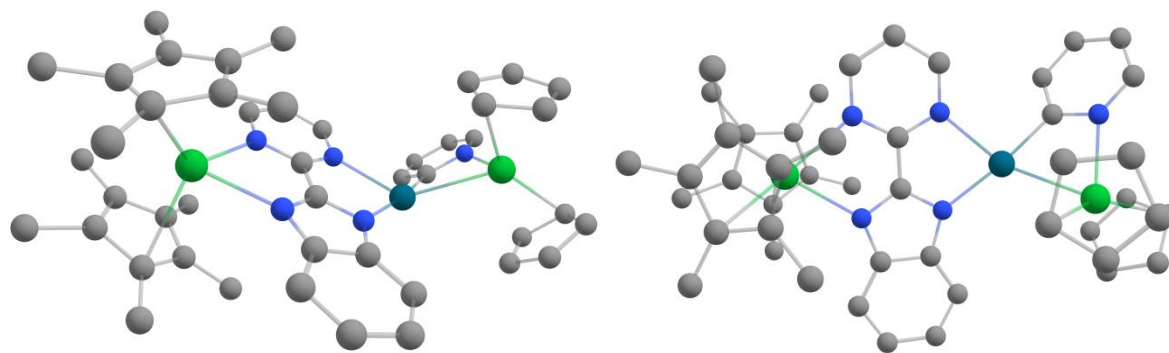

**Figure S60:** Structure of **13**, obtained following removal of the methane from **12**. The majority of H atoms and the  $C_{Me}$  of the  $Cp^*$  co-ligands are hidden in the interest of clarity.

**Table S46.** Main distances (in Å) and angles (in °) in the heterotrimetallic complexes **8-13**.

| Atoms                                      | Av. Values |       |       |       |       |       |
|--------------------------------------------|------------|-------|-------|-------|-------|-------|
|                                            | 8          | 9     | 10    | 11    | 12    | 13    |
| Pd-C <sub>Me</sub>                         | 2.036      | 2.106 | 2.192 | 2.089 | 2.668 |       |
| Pd-N <sub>py</sub> (or C <sub>py</sub> )   | 2.037      | 2.139 | 2.106 | 2.158 | 2.003 |       |
| Pd-H <sub>α</sub>                          | 2.949      | 3.011 | 1.623 | 1.593 | 1.891 |       |
| Pd-N <sub>pym</sub>                        | 2.154      | 3.449 | 3.162 | 3.220 | 2.980 | 2.319 |
| Pd-N <sub>imid</sub>                       | 2.027      | 2.254 | 2.270 | 2.134 | 2.246 | 2.142 |
| Yb-Pd                                      |            | 2.817 | 2.838 | 2.991 | 2.952 | 2.867 |
| Yb <sub>1</sub> -N <sub>pym</sub>          | 2.450      | 2.410 | 2.420 | 2.417 | 2.416 | 2.429 |
| Yb <sub>1</sub> -N <sub>imid</sub>         | 2.398      | 2.344 | 2.332 | 2.337 | 2.359 | 2.379 |
| Yb <sub>1</sub> – Cp* <sub>ctr</sub> (avg) | 2.345      | 2.343 | 2.344 | 2.342 | 2.344 | 2.340 |
| Yb <sub>2</sub> – Cp* <sub>ctr</sub> (avg) | 2.350      | 2.332 | 2.371 | 2.368 | 2.342 | 2.351 |
| Yb <sub>2</sub> -ligand plane              | ~49°       | ~39°  |       |       |       | ~46°  |
| Yb <sub>2</sub> -H <sub>α</sub>            | 2.672      | 3.679 | 2.436 | 2.117 | 3.341 |       |
| Yb <sub>2</sub> -H <sub>1Me</sub>          | 2.369      | 2.270 |       |       |       |       |
| Yb <sub>2</sub> -H <sub>2Me</sub>          | 2.692      | 3.238 |       |       |       |       |
| Yb <sub>2</sub> -C <sub>Me</sub>           | 2.936      | 2.659 |       |       |       |       |

## References

- 1 M. Haga, M. Ishizuya, T. Kanesugi, T. Yutaka, D. Sakiyama, J. Fees and W. Kaim, *Indian J. Chem Sect. A*, 2003, **42A**, 2290-2299.
- 2 Wim. De Graaf, Jaap. Boersma, W. J. J. Smeets, A. L. Spek and Gerard. Van Koten, *Organometallics*, 1989, **8**, 2907–2917.
- 3 D. J. Berg, C. J. Burns, R. A. Andersen and A. Zalkin, *Organometallics*, 1989, **8**, 1865–1870.
- 4 T. D. Tilley, J. M. Boncella, D. J. Berg, C. J. Burns, R. A. Andersen, G. A. Lawless, M. A. Edelman and M. F. Lappert, in *Inorganic Syntheses*, ed. A. P. Ginsberg, John Wiley & Sons, Inc., Hoboken, NJ, USA, 2007, pp. 146–150.
- 5 G. M. Sheldrick, *Acta Crystallogr. Sect. Found. Adv.*, 2015, **71**, 3–8.
- 6 G. M. Sheldrick, *Acta Crystallogr. A*, 2008, **64**, 112–122.
- 7 G. M. Sheldrick, *Acta Crystallogr. Sect. C Struct. Chem.*, 2015, **71**, 3–8.
- 8 O. V. Dolomanov, L. J. Bourhis, R. J. Gildea, J. A. K. Howard and H. Puschmann, *J. Appl. Crystallogr.*, 2009, **42**, 339–341.
- 9 C. F. Macrae, I. J. Bruno, J. A. Chisholm, P. R. Edgington, P. McCabe, E. Pidcock, L. Rodriguez-Monge, R. Taylor, J. van de Streek and P. A. Wood, *J. Appl. Crystallogr.*, 2008, **41**, 466–470.
- 10 F. Neese, *WIREs Comput. Mol. Sci.*, 2012, **2**, 73–78.
- 11 E. van Lenthe, E. J. Baerends and J. G. Snijders, *J. Chem. Phys.*, 1994, **101**, 9783–9792.
- 12 F. Weigend and R. Ahlrichs, *Phys. Chem. Chem. Phys.*, 2005, **7**, 3297.
- 13 F. Weigend, *Phys. Chem. Chem. Phys.*, 2006, **8**, 1057.
- 14 D. A. Pantazis and F. Neese, *J. Chem. Theory Comput.*, 2009, **5**, 2229–2238.
- 15 D. A. Pantazis, X.-Y. Chen, C. R. Landis and F. Neese, *J. Chem. Theory Comput.*, 2008, **4**, 908–919.
- 16 S. Grimme, S. Ehrlich and L. Goerigk, *J. Comput. Chem.*, 2011, **32**, 1456–1465.
- 17 S. Grimme, J. Antony, S. Ehrlich and H. Krieg, *J. Chem. Phys.*, 2010, **132**, 154104.
- 18 C. Adamo and V. Barone, *J. Chem. Phys.*, 1999, **110**, 6158–6170.
- 19 J. Tao, J. P. Perdew, V. N. Staroverov and G. E. Scuseria, *Phys. Rev. Lett.*, 2003, **91**, 146401.
- 20 O. A. Vydrov and G. E. Scuseria, *J. Chem. Phys.*, 2006, **125**, 234109.
- 21 J.-D. Chai and M. Head-Gordon, *J. Chem. Phys.*, 2008, **128**, 084106.
- 22 F. Aquilante, J. Autschbach, R. K. Carlson, L. F. Chibotaru, M. G. Delcey, L. De Vico, I. Fdez. Galván, N. Ferré, L. M. Frutos, L. Gagliardi, M. Garavelli, A. Giussani, C. E. Hoyer, G. Li Manni, H. Lischka, D. Ma, P. Å. Malmqvist, T. Müller, A. Nenov, M. Olivucci, T. B. Pedersen, D. Peng, F. Plasser, B. Pritchard, M. Reiher, I. Rivalta, I. Schapiro, J. Segarra-Martí, M. Stenrup, D. G. Truhlar, L. Ungur, A. Valentini, S. Vancoillie, V. Veryazov, V. P. Vysotskiy, O. Weingart, F. Zapata and R. Lindh, *J. Comput. Chem.*, 2016, **37**, 506–541.
- 23 V. Veryazov, P.-O. Widmark, L. Serrano-Andrés, R. Lindh and B. O. Roos, *Int. J. Quantum Chem.*, 2004, **100**, 626–635.
- 24 B. O. Roos, R. Lindh, P.-Å. Malmqvist, V. Veryazov, P.-O. Widmark and A. C. Borin, *J. Phys. Chem. A*, 2008, **112**, 11431–11435.
- 25 F. Aquilante, T. B. Pedersen, R. Lindh, B. O. Roos, A. Sánchez de Merás and H. Koch, *J. Chem. Phys.*, 2008, **129**, 024113.
- 26 P. L. A. Popelier, in *The Chemical Bond*, eds. G. Frenking and S. Shaik, Wiley-VCH Verlag GmbH & Co. KGaA, Weinheim, Germany, 2014, pp. 271–308.
- 27 P. L. A. Popelier, J. Burke and N. O. J. Malcolm, *Int. J. Quantum Chem.*, 2003, **92**, 326–336.

- 28 T. Lu and F. Chen, *J. Comput. Chem.*, 2012, **33**, 580–592.
- 29 P. de Silva and C. Corminboeuf, *J. Chem. Theory Comput.*, 2014, **10**, 3745–3756.
- 30 R. F. W. Bader, *J. Phys. Chem. A*, 1998, **102**, 7314–7323.
- 31 R. F. W. Bader, *Acc. Chem. Res.*, 1985, **18**, 9–15.
- 32 R. Bianchi, G. Gervasio and D. Marabello, *Inorg. Chem.*, 2000, **39**, 2360–2366.
- 33 A. D. Becke and K. E. Edgecombe, *J. Chem. Phys.*, 1990, **92**, 5397–5403.
- 34 G. te Velde, F. M. Bickelhaupt, E. J. Baerends, C. Fonseca Guerra, S. J. A. van Gisbergen, J. G. Snijders and T. Ziegler, *J. Comput. Chem.*, 2001, **22**, 931–967.
- 35 B. M. Gardner, D. Patel, A. D. Cornish, J. McMaster, W. Lewis, A. J. Blake, S. T. Liddle, *Chem. - Eur. J.* 2011, **17**, 11266–11273.
- 36 X. Fradera, M. A. Austen, R. F. W. Bader, *J. Phys. Chem. A* 1999, **103**, 304–314.
